# Supplementary material for: Automatic generation of explanations in autonomous systems: enhancing human interaction in smart home environments
Source: PeerJ Comput Sci. 2025 Aug 29;11:e3041. doi: 10.7717/peerj-cs.3041 (PMC12453768; doi:10.7717/peerj-cs.3041)
Supplement: Supplemental Information 1 [file peerj-cs-11-3041-s001.xlsx]

## Sheet: Data Questionnaire
General Data				Scenario 01								Scenario 02								Scenario 03								Scenario 04								Scenario 05
Date	How old are you?	What is your gender?	What do you consider to be your technological expertise?	(1) Annoying - Agreeable	(2) Complicated - Easy	(3) Useless - Useful	(4) Confused - Clear	(5) Boring - Lively	(6) No interest - Of interest	(7) Doubtful - Reliable	(8) Out of place - Adapted to the situation	(1) Annoying - Agreeable	(2) Complicated - Easy	(3) Useless - Useful	(4) Confused - Clear	(5) Boring - Lively	(6) No interest - Of interest	(7) Doubtful - Reliable	(8) Out of place - Adapted to the situation	(1) Annoying - Agreeable	(2) Complicated - Easy	(3) Useless - Useful	(4) Confused - Clear	(5) Boring - Lively	(6) No interest - Of interest	(7) Doubtful - Reliable	(8) Out of place - Adapted to the situation	(1) Annoying - Agreeable	(2) Complicated - Easy	(3) Useless - Useful	(4) Confused - Clear	(5) Boring - Lively	(6) No interest - Of interest	(7) Doubtful - Reliable	(8) Out of place - Adapted to the situation	(1) Annoying - Agreeable	(2) Complicated - Easy	(3) Useless - Useful	(4) Confused - Clear	(5) Boring - Lively	(6) No interest - Of interest	(7) Doubtful - Reliable	(8) Out of place - Adapted to the situation
2024-07-02 12:06:05	25	Male	I surround myself with electronic devices in my day-to-day life.	3	5	5	5	5	4	4	3	4	5	5	5	4	5	4	5	4	4	5	5	4	5	5	5	4	5	5	4	4	5	5	5	4	5	5	5	4	5	5	5
2024-07-02 12:29:55	28	Female	I use an electronic device on a daily basis (cell phone, smart TV, smartwatch, etc.).	2	3	4	3	3	4	3	2	5	4	4	4	4	4	3	4	5	5	5	5	5	5	5	5	4	4	4	4	4	4	4	4	5	5	5	5	5	5	5	5
2024-07-02 13:06:37	20	Male	I surround myself with electronic devices in my day-to-day life.	1	1	1	1	1	1	1	1	2	2	2	2	2	2	2	2	3	3	3	3	3	3	3	3	3	3	3	3	3	3	3	3	3	3	5	5	5	3	5	5
2024-07-02 13:26:18	29	Female	I surround myself with electronic devices in my day-to-day life.	4	4	5	5	5	5	5	5	4	4	5	4	4	4	4	5	4	4	4	4	4	4	4	4	4	4	4	4	4	5	4	4	4	4	4	4	5	5	5	5
2024-07-02 13:29:38	56	Male	I surround myself with electronic devices in my day-to-day life.	1	1	5	5	5	5	5	5	1	1	5	5	1	5	5	5	5	5	5	5	5	5	5	5	1	1	5	5	1	5	5	5	5	5	5	5	5	5	5	5
2024-07-02 14:01:21	29	Male	I surround myself with electronic devices in my day-to-day life.	2	2	2	1	2	2	3	3	1	2	4	2	3	4	2	2	1	3	2	2	2	4	2	3	1	2	2	2	3	4	1	1	1	2	4	2	3	4	3	1
2024-07-02 14:03:19	36	Male	I use an electronic device on a daily basis (cell phone, smart TV, smartwatch, etc.).	4	4	5	5	4	5	4	4	2	4	5	4	4	5	4	4	4	4	5	4	4	5	4	4	4	4	5	4	4	4	4	4	4	4	5	4	5	5	4	4
2024-07-02 14:09:55	51	Male	I surround myself with electronic devices in my day-to-day life.	2	3	2	2	3	3	3	2	3	3	3	3	3	3	3	3	3	3	3	3	3	3	3	3	3	3	3	3	3	3	3	3	3	3	3	3	3	3	3	3
2024-07-02 14:55:41	44	Male	I surround myself with electronic devices in my day-to-day life.	4	4	5	5	4	5	4	4	4	4	4	4	3	4	4	3	5	5	5	5	5	5	5	5	4	4	5	5	4	5	4	4	4	4	5	4	4	5	4	5
2024-07-02 15:05:16	53	Male	I use an electronic device on a daily basis (cell phone, smart TV, smartwatch, etc.).	3	3	5	5	3	5	3	5	3	3	5	5	3	5	3	5	3	3	5	5	3	5	3	5	3	3	5	5	3	5	3	5	3	3	5	5	3	5	3	5
2024-07-02 15:29:18	18	Male	I use an electronic device on a daily basis (cell phone, smart TV, smartwatch, etc.).	5	5	5	5	5	5	5	5	5	1	5	1	5	5	1	5	5	5	5	5	5	5	5	5	5	5	5	5	5	5	5	5	5	5	5	5	5	5	5	5
2024-07-02 15:30:02	21	Male	I use an electronic device on a daily basis (cell phone, smart TV, smartwatch, etc.).	5	5	5	5	5	5	5	4	5	5	5	5	5	5	5	5	5	5	5	5	5	5	5	5	5	5	5	5	5	5	5	5	5	5	5	5	5	5	5	5
2024-07-02 15:30:28	17	Male	I surround myself with electronic devices in my day-to-day life.	2	3	4	3	2	1	2	3	1	2	3	4	3	2	1	3	4	3	2	1	2	3	4	3	3	2	3	2	1	2	1	3	2	3	4	5	4	5	4	3
2024-07-02 15:30:31	37	Male	I surround myself with electronic devices in my day-to-day life.	1	5	5	5	1	5	5	5	1	1	5	5	1	5	5	5	5	5	5	5	1	5	5	5	1	1	5	5	1	5	5	5	1	5	5	5	5	5	5	5
2024-07-02 15:31:10	17	Male	I surround myself with electronic devices in my day-to-day life.	3	3	3	3	2	2	2	2	1	3	3	1	1	3	2	2	4	3	4	4	4	4	3	3	1	3	3	4	4	3	3	5	1	5	2	5	2	1	4	5
2024-07-02 15:31:54	17	Male	I use little or no electronic devices in my day-to-day life.	2	2	3	1	4	3	2	4	2	1	2	3	2	4	3	4	3	4	5	4	5	5	3	5	1	2	5	4	1	5	4	1	1	3	1	4	3	2	4	5
2024-07-02 15:32:00	17	Male	I use an electronic device on a daily basis (cell phone, smart TV, smartwatch, etc.).	2	3	5	1	5	2	5	1	1	1	2	1	1	5	1	5	1	2	3	1	1	5	1	1	1	1	3	1	1	3	1	1	1	5	1	5	1	1	1	5
2024-07-02 15:32:18	17	Male	I use an electronic device on a daily basis (cell phone, smart TV, smartwatch, etc.).	1	5	5	1	1	5	1	5	1	1	5	1	1	5	5	1	1	5	5	5	1	5	5	5	1	1	5	5	5	5	5	5	1	1	5	1	1	5	5	5
2024-07-02 15:32:20	17	Male	I surround myself with electronic devices in my day-to-day life.	3	5	1	5	1	1	5	1	1	5	5	1	1	5	1	1	5	1	5	5	5	5	5	5	1	1	1	1	1	5	5	5	5	5	5	5	5	5	5	5
2024-07-02 15:32:56	46	Male	I use an electronic device on a daily basis (cell phone, smart TV, smartwatch, etc.).	1	5	1	1	5	1	1	1	1	1	1	1	1	1	1	1	1	1	1	1	1	1	1	1	1	1	1	1	1	1	1	1	1	1	1	1	1	1	1	1
2024-07-02 15:33:21	18	Male	I use an electronic device on a daily basis (cell phone, smart TV, smartwatch, etc.).	1	1	5	1	1	5	1	5	1	1	5	2	2	5	1	5	1	1	5	2	2	5	2	5	1	1	5	2	2	5	2	5	1	1	5	2	2	5	2	5
2024-07-02 15:33:47	17	Female	I use an electronic device on a daily basis (cell phone, smart TV, smartwatch, etc.).	1	1	5	1	1	5	1	5	1	1	4	1	1	5	1	5	1	1	5	1	5	5	1	5	1	1	5	1	1	5	1	5	1	5	5	5	5	5	5	5
2024-07-02 15:34:30	20	Male	I surround myself with electronic devices in my day-to-day life.	1	2	5	2	4	5	3	1	2	2	5	3	3	5	3	4	2	2	5	4	1	5	3	1	1	2	4	3	3	5	4	5	3	5	5	5	3	5	5	5
2024-07-02 15:34:35	17	Male	I surround myself with electronic devices in my day-to-day life.	1	5	5	1	5	5	1	1	1	1	1	1	5	5	1	1	5	5	5	5	1	5	5	5	5	5	5	5	2	2	5	5	1	5	5	1	1	5	1	1
2024-07-02 15:34:44	18	Male	I use an electronic device on a daily basis (cell phone, smart TV, smartwatch, etc.).	4	4	3	5	5	4	2	2	2	4	2	5	3	2	4	2	2	3	2	5	2	4	4	5	2	1	5	4	3	4	5	4	2	4	1	3	2	4	3	5
2024-07-02 15:35:03	17	Female	I use an electronic device on a daily basis (cell phone, smart TV, smartwatch, etc.).	5	3	5	3	5	5	1	3	3	1	3	1	3	1	3	4	3	3	4	5	2	5	5	5	1	1	5	1	2	5	1	1	1	4	4	5	3	3	4	3
2024-07-02 15:35:20	19	Female	I use an electronic device on a daily basis (cell phone, smart TV, smartwatch, etc.).	5	4	5	3	2	5	4	5	5	2	5	5	4	2	5	5	2	4	3	2	4	4	1	3	1	1	3	1	3	5	3	4	1	4	2	1	1	4	3	2
2024-07-02 15:35:38	19	Female	I use an electronic device on a daily basis (cell phone, smart TV, smartwatch, etc.).	3	2	4	4	3	5	3	2	1	3	4	3	3	3	3	3	5	5	5	5	3	5	5	5	1	3	5	4	3	5	4	4	4	3	4	4	3	4	3	4
2024-07-02 15:35:46	19	Male	I use an electronic device on a daily basis (cell phone, smart TV, smartwatch, etc.).	3	2	4	3	2	5	3	1	1	3	4	3	2	3	3	1	5	1	5	4	3	5	5	5	1	3	5	4	3	5	4	4	4	4	5	5	3	4	3	4
2024-07-02 15:35:46	17	Male	I use an electronic device on a daily basis (cell phone, smart TV, smartwatch, etc.).	3	4	3	4	3	5	3	1	2	3	2	3	3	3	3	1	5	5	5	5	3	5	5	5	1	3	5	4	3	5	4	4	4	3	5	4	3	4	3	4
2024-07-02 15:37:52	17	Male	I use little or no electronic devices in my day-to-day life.	3	1	1	3	3	1	1	1	1	1	5	1	3	5	5	1	3	5	5	5	5	5	5	5	1	1	5	5	1	5	5	1	5	5	5	5	5	5	5	5
2024-07-02 15:38:04	18	Male	I use an electronic device on a daily basis (cell phone, smart TV, smartwatch, etc.).	5	1	5	1	5	3	3	2	1	2	5	1	1	1	1	2	5	2	5	2	3	2	2	5	1	1	2	1	4	3	1	2	2	2	5	1	2	3	2	2
2024-07-02 15:38:08	17	Male	I use little or no electronic devices in my day-to-day life.	3	3	4	4	3	2	2	3	1	2	3	2	3	3	2	3	2	1	3	3	2	2	3	3	4	3	4	3	4	3	3	3	5	4	4	3	3	4	4	3
2024-07-02 15:39:16	22	Male	I use little or no electronic devices in my day-to-day life.	5	1	1	2	3	5	4	3	1	1	3	4	5	3	2	3	5	1	5	5	3	2	3	4	2	5	5	4	3	2	3	3	2	5	4	3	5	3	4	1
2024-07-02 15:41:07	20	Male	I surround myself with electronic devices in my day-to-day life.	1	3	5	5	2	3	1	1	1	2	2	5	1	5	5	5	5	5	5	5	2	5	5	5	1	1	1	5	1	5	1	1	1	1	1	1	2	5	1	1
2024-07-02 15:41:55	30	Male	I surround myself with electronic devices in my day-to-day life.	1	1	1	1	1	1	1	1	3	3	4	4	3	4	3	4	2	3	4	3	3	3	3	3	5	4	5	5	4	5	3	4	5	5	5	5	4	4	3	4
2024-07-02 15:46:49	30	Male	I surround myself with electronic devices in my day-to-day life.	2	2	2	2	1	1	2	1	1	2	1	1	2	1	1	1	3	3	2	2	3	4	4	4	1	1	1	2	1	2	1	1	2	3	3	3	3	3	4	3
2024-07-02 16:09:44	19	Male	I surround myself with electronic devices in my day-to-day life.	4	4	4	4	4	4	4	3	4	4	4	4	4	4	4	4	4	4	4	4	4	4	4	4	5	5	5	5	5	5	5	5	5	5	5	5	5	5	5	5
2024-07-02 17:59:31	19	Male	I surround myself with electronic devices in my day-to-day life.	2	2	3	3	4	3	2	4	2	3	3	2	4	5	4	3	3	4	4	3	5	3	4	3	2	4	3	2	4	3	3	4	2	4	2	3	3	5	4	4
2024-07-02 18:01:39	30	Male	I use an electronic device on a daily basis (cell phone, smart TV, smartwatch, etc.).	3	5	5	5	5	4	3	3	3	4	4	4	4	4	4	4	3	4	5	4	4	4	4	4	3	4	4	4	4	5	4	5	4	4	5	5	5	5	5	5
2024-07-02 18:01:56	18	Male	I use an electronic device on a daily basis (cell phone, smart TV, smartwatch, etc.).	3	3	4	4	2	4	4	2	3	3	4	5	3	3	4	3	3	4	5	5	3	5	5	5	4	4	5	5	4	5	5	5	3	5	5	5	3	5	5	5
2024-07-02 18:03:30	18	Male	I use an electronic device on a daily basis (cell phone, smart TV, smartwatch, etc.).	3	4	3	4	3	5	3	2	3	2	3	4	2	2	4	2	4	4	5	4	3	5	4	5	4	3	4	4	3	5	4	5	4	4	4	4	3	5	4	5
2024-07-02 18:05:33	29	Male	I use an electronic device on a daily basis (cell phone, smart TV, smartwatch, etc.).	2	5	1	4	5	4	4	3	4	5	5	5	5	5	5	4	4	5	5	5	5	5	5	5	5	5	5	5	5	5	5	5	4	5	5	5	5	5	5	5
2024-07-02 18:08:29	21	Male	I use an electronic device on a daily basis (cell phone, smart TV, smartwatch, etc.).	5	5	5	5	5	5	1	1	5	3	5	5	4	5	5	5	5	5	5	5	5	5	5	5	5	5	5	5	5	5	5	5	5	5	5	5	5	5	5	5
2024-07-02 18:13:50	18	Male	I use an electronic device on a daily basis (cell phone, smart TV, smartwatch, etc.).	3	3	3	4	4	3	3	3	3	3	2	3	3	3	3	2	4	3	4	4	3	5	3	4	3	2	5	5	4	5	4	5	3	3	4	3	2	4	3	3
2024-07-02 18:19:35	18	Female	I use an electronic device on a daily basis (cell phone, smart TV, smartwatch, etc.).	1	1	5	5	1	5	1	1	1	1	5	1	1	5	1	1	1	5	5	5	1	5	1	5	5	5	5	5	5	5	5	5	1	5	5	5	5	5	5	5
2024-07-02 18:26:47	21	Male	I surround myself with electronic devices in my day-to-day life.	1	2	1	3	1	1	1	2	2	3	1	2	3	1	3	1	1	3	1	3	3	1	3	1	1	2	2	3	3	1	3	1	4	3	5	5	4	4	4	5
2024-07-02 18:27:43	29	Male	I use an electronic device on a daily basis (cell phone, smart TV, smartwatch, etc.).	4	5	5	4	5	5	4	5	4	4	5	5	5	5	4	4	4	5	5	5	5	5	4	4	4	5	5	5	5	5	5	4	5	4	5	5	5	5	5	4
2024-07-02 18:32:17	18	Male	I surround myself with electronic devices in my day-to-day life.	3	5	5	5	5	5	5	4	5	5	5	5	5	5	5	5	4	5	5	5	4	5	5	5	5	5	5	5	5	5	5	5	5	5	5	5	5	5	5	5
2024-07-02 18:38:13	19	Male	I surround myself with electronic devices in my day-to-day life.	3	2	3	3	3	3	3	2	2	3	3	3	3	4	3	4	3	3	4	4	4	5	5	5	4	4	5	5	3	5	3	3	3	5	5	5	3	4	4	4
2024-07-02 18:38:59	20	Male	I use an electronic device on a daily basis (cell phone, smart TV, smartwatch, etc.).	1	5	2	5	3	2	5	2	3	5	5	5	3	4	5	4	3	5	4	5	3	4	5	5	4	5	5	5	3	4	5	4	4	5	5	5	3	3	5	4
2024-07-02 18:48:59	20	Male	I use an electronic device on a daily basis (cell phone, smart TV, smartwatch, etc.).	4	4	5	5	5	5	5	5	5	5	5	5	5	5	5	5	5	4	5	5	5	4	5	5	5	5	4	5	5	4	4	5	5	4	5	5	5	4	4	5
2024-07-02 18:52:44	20	Male	I use an electronic device on a daily basis (cell phone, smart TV, smartwatch, etc.).	2	3	3	3	3	3	3	3	4	5	5	5	5	5	5	5	5	5	5	5	5	5	5	5	5	5	5	5	5	5	5	5	5	5	5	5	5	5	5	5
2024-07-02 18:59:13	23	Male	I use an electronic device on a daily basis (cell phone, smart TV, smartwatch, etc.).	4	5	5	5	4	4	5	3	3	5	4	5	3	2	5	2	3	5	5	5	2	5	5	5	3	5	5	5	3	5	5	5	5	5	5	5	3	5	5	5
2024-07-02 18:59:51	20	Female	I surround myself with electronic devices in my day-to-day life.	2	2	2	2	3	2	2	1	1	3	2	2	1	4	2	3	4	3	4	3	3	3	4	3	2	3	3	2	2	3	1	3	3	2	2	3	2	2	3	3
2024-07-02 19:04:28	19	Female	I use an electronic device on a daily basis (cell phone, smart TV, smartwatch, etc.).	4	4	4	3	4	3	2	3	2	3	2	3	1	4	1	3	1	2	3	2	3	4	2	1	1	4	4	1	1	1	1	2	4	1	4	1	2	2	2	4
2024-07-02 19:05:49	18	Female	I surround myself with electronic devices in my day-to-day life.	1	5	5	1	5	5	1	5	1	5	1	1	1	5	1	5	5	5	5	5	5	5	5	5	5	5	5	5	5	5	5	5	5	5	5	5	5	5	5	5
2024-07-02 19:06:37	20	Male	I use an electronic device on a daily basis (cell phone, smart TV, smartwatch, etc.).	4	3	4	3	4	3	4	3	3	4	4	3	4	3	4	3	4	4	3	4	3	4	3	4	4	4	3	3	4	4	3	4	3	4	4	4	4	3	4	4
2024-07-02 19:07:34	18	Male	I use an electronic device on a daily basis (cell phone, smart TV, smartwatch, etc.).	1	2	3	1	2	3	1	1	1	1	4	4	2	5	5	5	2	5	5	5	5	5	5	3	1	3	1	3	3	2	3	3	3	2	2	3	1	2	3	3
2024-07-02 19:07:46	18	Male	I use an electronic device on a daily basis (cell phone, smart TV, smartwatch, etc.).	3	4	4	4	3	4	4	3	3	4	5	5	5	3	4	3	1	2	5	3	3	5	5	5	5	5	5	5	5	5	5	5	4	4	4	4	3	4	4	4
2024-07-02 19:07:48	19	Male	I surround myself with electronic devices in my day-to-day life.	3	3	5	4	4	4	4	4	5	5	5	5	5	5	5	5	5	5	5	4	5	5	5	5	5	5	5	5	5	5	5	5	5	5	5	5	5	5	5	5
2024-07-02 19:08:03	20	Male	I use an electronic device on a daily basis (cell phone, smart TV, smartwatch, etc.).	1	3	3	3	3	4	3	2	3	3	3	3	3	3	3	3	4	4	4	3	3	3	3	3	4	3	4	4	3	4	4	4	3	3	3	3	3	3	3	3
2024-07-02 19:08:07	18	Female	I use an electronic device on a daily basis (cell phone, smart TV, smartwatch, etc.).	3	3	4	2	3	3	2	2	3	3	5	4	3	5	2	2	2	1	4	4	1	5	4	4	3	3	5	5	3	5	5	5	4	5	5	5	3	5	5	5
2024-07-02 19:08:30	19	Male	I use an electronic device on a daily basis (cell phone, smart TV, smartwatch, etc.).	4	4	4	4	4	4	4	3	4	4	4	4	4	4	4	4	4	4	4	4	4	4	4	4	5	5	5	4	5	5	5	5	1	3	4	4	4	5	5	5
2024-07-02 19:08:42	18	Female	I surround myself with electronic devices in my day-to-day life.	4	4	3	3	2	3	3	3	3	3	3	3	3	1	3	3	3	3	3	3	3	3	3	3	3	3	3	3	3	3	3	3	3	3	3	3	3	3	3	3
2024-07-02 19:09:54	18	Male	I use an electronic device on a daily basis (cell phone, smart TV, smartwatch, etc.).	5	5	5	5	5	5	5	5	4	5	5	5	5	5	5	5	4	5	5	5	5	5	5	5	5	5	5	5	5	5	5	5	5	5	5	5	5	5	5	5
2024-07-02 19:12:24	18	Male	I use an electronic device on a daily basis (cell phone, smart TV, smartwatch, etc.).	2	4	4	4	2	3	2	1	4	4	4	4	4	4	2	3	5	5	5	4	5	5	4	5	5	5	5	5	5	5	5	5	5	5	5	4	5	5	4	5
2024-07-02 19:13:49	19	Male	I use an electronic device on a daily basis (cell phone, smart TV, smartwatch, etc.).	1	1	3	3	1	2	2	2	3	3	3	3	3	3	3	3	3	3	3	3	3	3	3	3	3	3	3	3	3	3	3	3	3	3	3	3	3	3	3	3
2024-07-02 19:16:11	35	Male	I surround myself with electronic devices in my day-to-day life.	2	1	1	1	1	2	2	4	4	4	4	4	3	5	4	5	2	3	3	4	3	4	4	4	4	4	4	4	4	4	4	4	5	5	5	5	5	5	5	5
2024-07-02 19:17:01	20	Female	I use an electronic device on a daily basis (cell phone, smart TV, smartwatch, etc.).	2	2	2	2	2	2	2	2	2	2	2	2	2	2	2	2	3	3	3	3	3	3	3	3	1	1	1	1	1	1	1	1	2	2	2	2	2	2	2	2
2024-07-02 19:17:37	21	Male	I use an electronic device on a daily basis (cell phone, smart TV, smartwatch, etc.).	2	5	5	5	2	5	5	5	1	1	1	1	3	2	1	1	1	1	2	1	1	1	2	1	1	1	2	1	1	1	1	1	4	4	4	2	3	4	4	4
2024-07-02 19:20:33	18	Female	I surround myself with electronic devices in my day-to-day life.	4	5	4	3	2	4	3	4	3	1	5	2	2	5	4	2	2	5	5	5	3	5	5	3	2	2	4	3	2	5	3	5	3	4	4	4	3	4	3	5
2024-07-02 19:23:46	19	Male	I surround myself with electronic devices in my day-to-day life.	2	3	3	3	4	4	3	3	3	4	4	4	3	4	4	4	1	2	3	2	2	3	3	3	4	3	4	4	4	4	4	4	2	2	2	3	2	2	2	3
2024-07-02 19:33:23	18	Female	I use an electronic device on a daily basis (cell phone, smart TV, smartwatch, etc.).	2	3	4	2	3	3	3	1	1	3	3	4	2	2	2	3	1	3	4	5	1	3	4	4	1	1	5	5	2	5	5	5	3	5	5	5	4	5	5	5
2024-07-02 19:37:20	20	Male	I use an electronic device on a daily basis (cell phone, smart TV, smartwatch, etc.).	3	4	3	4	2	3	4	4	2	2	2	2	2	2	2	2	2	3	4	4	2	4	3	2	4	4	4	4	4	4	4	4	4	4	4	4	4	4	4	4
2024-07-02 19:39:36	20	Male	I surround myself with electronic devices in my day-to-day life.	2	4	3	4	3	3	3	3	4	4	4	4	3	4	4	4	4	3	4	4	3	4	4	4	4	4	4	4	4	4	4	4	3	3	3	4	3	2	3	3
2024-07-02 19:40:47	18	Male	I use an electronic device on a daily basis (cell phone, smart TV, smartwatch, etc.).	4	4	4	4	3	3	3	4	3	3	3	3	3	3	3	3	2	2	3	3	2	2	3	1	4	4	4	3	3	4	4	4	4	4	4	4	3	4	4	4
2024-07-02 19:46:50	18	Male	I use an electronic device on a daily basis (cell phone, smart TV, smartwatch, etc.).	5	4	4	4	3	4	3	1	2	2	2	5	3	4	3	3	3	3	5	4	2	2	2	4	1	5	4	3	3	5	3	4	5	4	3	4	2	5	3	5
2024-07-02 20:48:26	18	Female	I use an electronic device on a daily basis (cell phone, smart TV, smartwatch, etc.).	3	3	4	2	3	4	3	4	3	4	5	5	5	5	5	4	3	3	5	5	3	5	5	5	2	2	5	5	2	3	4	5	1	5	5	5	3	5	5	5
2024-07-02 21:18:48	37	Female	I surround myself with electronic devices in my day-to-day life.	5	5	5	5	5	5	5	5	1	1	5	5	1	5	5	5	1	1	1	1	1	5	5	5	5	1	5	5	5	5	5	4	5	5	5	5	5	5	5	5
2024-07-02 22:15:31	25	Male	I surround myself with electronic devices in my day-to-day life.	5	5	5	5	5	1	2	3	2	4	3	3	3	4	3	3	5	5	5	5	5	5	5	5	4	3	2	4	2	3	4	3	4	3	4	3	4	3	4	3
2024-07-02 22:21:34	33	Male	I use an electronic device on a daily basis (cell phone, smart TV, smartwatch, etc.).	3	3	3	3	3	3	3	3	4	4	3	4	3	3	3	3	4	4	4	4	4	4	4	4	4	4	4	4	4	4	4	4	4	4	4	4	4	4	4	4
2024-07-02 22:25:14	20	Female	I surround myself with electronic devices in my day-to-day life.	3	4	3	3	4	3	3	3	4	3	3	3	3	3	3	3	3	4	3	4	4	3	4	3	3	3	4	4	3	3	3	3	3	4	3	4	3	4	3	4
2024-07-02 22:26:09	24	Male	I surround myself with electronic devices in my day-to-day life.	3	4	3	4	3	4	3	4	3	4	3	4	3	4	3	4	3	5	5	3	5	3	5	4	5	5	3	5	5	3	3	4	5	4	3	4	4	4	5	4
2024-07-02 22:26:56	25	Male	I surround myself with electronic devices in my day-to-day life.	4	5	4	4	5	4	4	4	3	5	4	4	4	5	4	4	3	5	4	4	5	4	4	5	4	5	4	5	4	5	4	5	4	5	4	5	4	5	4	5
2024-07-02 22:29:05	29	Male	I surround myself with electronic devices in my day-to-day life.	1	1	1	1	1	1	1	1	3	3	3	3	3	3	3	3	2	2	2	2	2	2	2	2	3	3	3	3	3	3	3	3	3	3	3	3	3	3	3	3
2024-07-02 22:30:47	24	Male	I use an electronic device on a daily basis (cell phone, smart TV, smartwatch, etc.).	1	2	3	2	1	3	4	2	1	2	5	5	2	4	4	3	1	1	4	4	5	4	2	4	1	1	1	2	2	2	2	1	2	2	3	2	2	4	3	3
2024-07-02 23:21:06	17	Female	I use an electronic device on a daily basis (cell phone, smart TV, smartwatch, etc.).	1	2	1	1	1	1	1	1	1	3	1	1	1	1	5	1	4	4	5	5	3	5	5	5	5	5	5	5	4	5	5	5	4	5	5	5	5	5	5	5
2024-07-02 23:21:46	18	Male	I use little or no electronic devices in my day-to-day life.	5	5	5	5	5	5	5	5	5	5	5	5	5	5	5	5	3	4	4	4	4	4	4	4	3	3	3	3	3	3	3	3	4	4	4	4	4	4	4	4
2024-07-03 01:49:19	25	Female	I surround myself with electronic devices in my day-to-day life.	1	2	3	1	2	3	3	5	1	2	1	1	3	1	2	1	1	3	2	3	2	2	2	2	3	2	3	4	2	4	4	4	4	4	4	4	4	4	4	4
2024-07-03 02:17:53	45	Female	I surround myself with electronic devices in my day-to-day life.	4	3	5	5	3	3	2	4	1	3	5	5	3	4	4	3	1	3	5	5	3	5	5	4	2	2	5	5	2	4	3	3	3	3	3	5	4	4	4	4
2024-07-03 02:46:45	17	Female	I use an electronic device on a daily basis (cell phone, smart TV, smartwatch, etc.).	2	2	4	4	4	4	3	2	3	4	5	4	4	5	4	4	4	5	5	4	4	5	5	5	5	5	5	4	4	5	4	5	5	4	5	4	4	5	4	5
2024-07-03 03:03:48	18	Male	I surround myself with electronic devices in my day-to-day life.	1	1	1	5	1	1	1	1	1	5	1	1	1	1	1	1	5	5	5	5	5	5	5	5	5	1	1	1	1	5	5	5	5	5	5	5	5	5	5	5
2024-07-03 03:27:26	19	Male	I use an electronic device on a daily basis (cell phone, smart TV, smartwatch, etc.).	3	3	3	2	3	4	1	3	2	3	3	3	3	3	3	3	3	3	3	3	3	3	3	3	3	3	3	3	3	3	3	3	4	2	3	2	3	2	3	3
2024-07-03 07:28:27	44	Female	I use an electronic device on a daily basis (cell phone, smart TV, smartwatch, etc.).	5	1	5	5	5	5	1	5	1	1	5	5	1	5	1	5	5	5	5	5	5	5	5	5	1	1	1	1	1	5	1	1	5	5	5	5	5	5	5	5
2024-07-03 10:14:33	29	Male	I use an electronic device on a daily basis (cell phone, smart TV, smartwatch, etc.).	4	4	5	5	4	5	5	5	5	5	5	5	4	4	5	5	4	4	4	5	4	4	5	5	5	5	5	5	4	5	5	5	4	5	5	4	5	5	5	5
2024-07-03 15:38:33	47	Female	I surround myself with electronic devices in my day-to-day life.	1	5	1	5	1	3	5	1	4	5	5	5	3	5	5	3	4	5	5	5	3	5	5	3	4	5	3	3	3	5	5	3	5	5	5	5	3	5	5	5
2024-07-03 16:59:32	69	Male	I use an electronic device on a daily basis (cell phone, smart TV, smartwatch, etc.).	3	3	4	3	3	4	4	4	3	4	3	4	3	4	3	4	3	3	5	3	3	4	3	3	2	2	4	3	3	4	4	4	3	3	4	4	3	3	3	3
2024-07-04 01:40:05	40	Male	I surround myself with electronic devices in my day-to-day life.	2	2	3	3	3	2	3	3	3	3	3	3	3	3	3	3	3	3	4	3	3	4	3	3	3	3	4	4	3	4	3	3	3	3	4	4	3	4	3	3
2024-07-04 04:21:12	52	Male	I surround myself with electronic devices in my day-to-day life.	1	3	5	5	5	3	4	1	3	3	5	5	3	5	5	5	1	3	5	5	1	5	4	1	3	1	5	4	3	5	3	5	1	1	5	4	3	5	5	5
2024-07-04 10:23:15	35	Male	I surround myself with electronic devices in my day-to-day life.	4	5	5	5	4	4	4	5	2	4	4	4	2	4	3	3	4	5	5	3	4	5	5	5	4	4	5	4	4	5	4	5	4	5	5	4	3	5	4	5
2024-07-04 13:27:36	37	Male	I surround myself with electronic devices in my day-to-day life.	1	3	3	3	3	3	4	2	3	3	4	4	3	3	3	3	3	4	4	4	4	4	4	4	2	1	4	4	4	4	4	4	5	5	5	5	4	5	5	5
2024-07-04 13:38:52	58	Male	I use an electronic device on a daily basis (cell phone, smart TV, smartwatch, etc.).	3	3	4	4	3	3	4	4	4	4	5	5	3	5	5	5	4	4	5	5	4	5	5	5	1	3	5	4	4	5	4	5	5	5	5	5	4	5	5	5
2024-07-04 13:58:05	41	Male	I surround myself with electronic devices in my day-to-day life.	3	3	4	5	4	4	4	4	2	4	4	4	4	5	4	4	5	5	5	4	4	5	4	5	3	3	4	5	4	5	4	4	2	4	4	4	4	4	4	4
2024-07-04 13:59:56	35	Male	I use an electronic device on a daily basis (cell phone, smart TV, smartwatch, etc.).	5	5	5	1	5	5	5	5	1	1	5	5	5	5	1	5	1	5	5	5	1	5	5	5	1	5	5	1	1	5	1	5	1	5	5	5	1	1	1	1
2024-07-04 14:06:53	44	Male	I surround myself with electronic devices in my day-to-day life.	2	4	4	4	1	3	3	4	4	4	4	4	4	4	4	4	1	4	4	4	1	4	4	1	1	2	4	4	2	4	4	1	3	3	3	4	2	4	4	2
2024-07-04 14:09:03	39	Male	I use an electronic device on a daily basis (cell phone, smart TV, smartwatch, etc.).	3	3	2	2	2	3	2	2	3	2	2	3	2	3	2	3	3	3	2	2	3	2	2	2	2	3	2	3	3	3	2	2	3	2	2	2	3	3	2	2
2024-07-04 14:29:53	27	Male	I use an electronic device on a daily basis (cell phone, smart TV, smartwatch, etc.).	3	4	4	3	4	4	3	3	2	2	2	2	2	2	3	2	4	4	4	4	4	4	4	4	2	2	2	2	1	2	2	1	1	2	2	2	2	2	2	2
2024-07-04 14:30:48	56	Male	I use an electronic device on a daily basis (cell phone, smart TV, smartwatch, etc.).	5	5	5	5	5	5	5	5	5	5	5	5	5	5	5	5	5	5	5	5	5	5	5	5	5	5	5	5	5	5	5	5	5	5	5	5	5	5	5	5
2024-07-04 14:56:33	55	Male	I use an electronic device on a daily basis (cell phone, smart TV, smartwatch, etc.).	1	3	3	2	2	2	3	1	4	4	3	3	3	5	4	4	1	1	1	1	1	1	1	1	2	2	2	3	2	4	2	2	1	1	3	3	2	3	2	3
2024-07-04 15:02:37	58	Male	I use an electronic device on a daily basis (cell phone, smart TV, smartwatch, etc.).	1	2	1	2	2	1	1	1	1	1	2	2	1	1	2	2	2	2	2	3	3	2	2	2	4	4	4	4	3	3	4	4	4	4	4	3	3	4	4	3
2024-07-04 15:04:01	35	Male	I use an electronic device on a daily basis (cell phone, smart TV, smartwatch, etc.).	4	3	3	2	3	3	3	3	4	3	3	3	3	3	3	3	4	4	4	4	4	4	4	4	3	3	3	3	3	3	3	3	4	3	3	3	3	3	3	3
2024-07-04 15:35:52	56	Male	I surround myself with electronic devices in my day-to-day life.	2	2	2	2	2	2	2	2	4	4	4	4	4	4	4	4	4	4	4	4	4	4	4	4	4	4	4	4	4	4	4	4	4	4	4	4	4	4	4	4
2024-07-04 15:49:58	36	Male	I use an electronic device on a daily basis (cell phone, smart TV, smartwatch, etc.).	1	2	1	2	1	1	2	1	1	1	1	1	1	1	1	1	4	5	5	5	5	5	5	5	5	5	5	5	5	5	5	5	5	5	5	5	5	5	5	5
2024-07-04 17:01:14	59	Male	I use an electronic device on a daily basis (cell phone, smart TV, smartwatch, etc.).	3	5	4	4	5	5	5	4	1	3	5	5	5	5	4	4	5	5	5	5	5	5	5	5	4	4	4	5	5	5	5	5	5	5	5	5	5	5	5	5
2024-07-04 17:08:46	62	Male	I surround myself with electronic devices in my day-to-day life.	1	3	3	5	2	1	5	5	3	5	3	5	4	3	5	5	5	5	5	5	5	5	5	5	3	3	3	5	3	4	5	5	1	3	3	3	3	3	5	4
2024-07-04 18:33:22	55	Male	I surround myself with electronic devices in my day-to-day life.	4	5	3	5	3	4	4	1	2	5	5	5	4	5	5	5	1	5	5	5	3	5	5	5	1	5	5	5	3	5	5	5	1	5	5	5	3	5	5	5
2024-07-04 18:33:33	20	Male	I surround myself with electronic devices in my day-to-day life.	1	5	1	5	1	1	1	1	1	5	1	5	1	1	5	1	5	5	5	5	5	5	5	5	1	5	5	5	1	5	5	5	1	5	5	5	1	5	5	5

## Sheet: Análisis datos Generales
Generó	Cantidad Participantes					Edad	Cantidad Participantes		Experiencia tecnológica	Cantidad Participantes		Cuenta de ¿Cuál consideras que es tu experiencia tecnológica?	Por edades
Femenino	24					17	14		Me rodeo de dispositivos electrónicos en mi día a día.	49		Experiencia tecnológica	17	18	19	20	21	22	23	24	25	27	28	29	30	33	35	36	37	39	40	41	44	45	46	47	51	52	53	55	56	58	59	62	69	Total general
Masculino	94					18	23		Utilizo algún dispositivo electrónico de forma diaria (Móvil, Smart tv, Smartwatch, etc.)	64		Me rodeo de dispositivos electrónicos en mi día a día.	4	5	5	7	1			1	4			3	2		2		3		1	1	2	1		1	1	1		1	2			1		49
Total general	118					19	12		Utilizo pocos o ningún dispositivo electrónico en mi día a día.	5		Utilizo algún dispositivo electrónico de forma diaria (Móvil, Smart tv, Smartwatch, etc.)	7	17	7	7	3		1	1		1	1	3	1	1	2	2		1			1		1				1	1	1	2	1		1	64
						20	14		Total general	118		Utilizo pocos o ningún dispositivo electrónico en mi día a día.	3	1				1																												5
						21	4					Total general	14	23	12	14	4	1	1	2	4	1	1	6	3	1	4	2	3	1	1	1	3	1	1	1	1	1	1	2	3	2	1	1	1	118
						22	1
						23	1
						24	2
Cuenta de ¿Cuál consideras que es tu experiencia tecnológica?	Experiencia Tecnológica					25	4
Generó	Me rodeo de dispositivos electrónicos en mi día a día.	Utilizo algún dispositivo electrónico de forma diaria (Móvil, Smart tv, Smartwatch, etc.)	Utilizo pocos o ningún dispositivo electrónico en mi día a día.	Total general		27	1
Femenino	10	14		24		28	1
Masculino	39	50	5	94		29	6
Total general	49	64	5	118		30	3
						33	1
%	41.5254	54.2373	4.23729			35	4
						36	2
						37	3
						39	1
						40	1
						41	1
						44	3
						45	1
						46	1
						47	1
						51	1
						52	1
						53	1
						55	2
						56	3
						58	2
						59	1
						62	1
						69	1
						Total general	118

## Sheet: General Data
Number of participants by gender						Number of ages per participant
Gender	Number of Participants					Age	Number of Participants
Female	24					17	14		62	69	Total general
Male	94					18	23		1		49
Grand total	118					19	12			1	64
						20	14				5
						21	4		1	1	118
						22	1
						23	1
						24	2
What do you consider to be your technological expertise?						25	4
Gender	I surround myself with electronic devices in my day-to-day life.	I use an electronic device on a daily basis (cell phone, smart TV, smartwatch, etc.).	I use little or no electronic devices in my day-to-day life.	Total		27	1
Female	10	14		24		28	1
Male	39	50	5	94		29	6
Grand Total	49	64	5	118		30	3
						33	1
%	41.5254	54.2373	4.23729	100		35	4
						36	2
						37	3
						39	1
						40	1
						41	1
						44	3
						45	1
						46	1
						47	1
						51	1
						52	1
						53	1
						55	2
						56	3
						58	2
						59	1
						62	1
						69	1
						Total	118

## Sheet: E01
Scenario 01 data analysis
								Negative Category	1	2	3	4	5	Positive Category
	Score							Annoying	31	22	30	20	15	Pleasant
	1	2	3	4	5	Total		Complicated	14	20	31	23	30	Easy
(1) Annoying - Pleasant (5)	31	22	30	20	15	118		Unusable	16	8	28	26	40	Useful
								Confusing	18	17	24	23	36	Clear
	Score							Boring	20	20	31	19	28	Lively
	1	2	3	4	5	Total		Uninteresting	16	12	30	25	35	Interesting
(1) Complicated - Easy (5)	14	20	31	23	30	118		Doubtful	22	19	33	23	21	Reliable
								Out of place	29	20	26	20	23	Adapted to the situation
	Score
	1	2	3	4	5	Total
(1) Useless - Useful (5)	16	8	28	26	40	118
	Score
	1	2	3	4	5	Total
(1) Confused - Clear (5)	18	17	24	23	36	118
	Score
	1	2	3	4	5	Total
(1) Bored - Lively (5)	20	20	31	19	28	118
	Score
	1	2	3	4	5	Total
(1) No interest - Of interest (5)	16	12	30	25	35	118
	Score
	1	2	3	4	5	Total
(1) Doubtful - Reliable (5)	22	19	33	23	21	118
	Score
	1	2	3	4	5	Total
(1) Out of place - Adapted to the situation (5)	29	20	26	20	23	118

## Sheet: E02
Scenario 02 data analysis
								Negative Category	1	2	3	4	5	Positive Category
	Score							Annoying	38	19	30	20	11	Pleasant
	1	2	3	4	5	Total		Complicated	22	17	31	27	21	Easy
(1) Annoying - Pleasant (5)	38	19	30	20	11	118		Unusable	11	15	25	24	43	Useful
								Confusing	19	12	22	28	37	Clear
	Score							Boring	21	15	45	20	17	Lively
	1	2	3	4	5	Total		Uninteresting	12	11	23	26	46	Interesting
(1) Complicated - Easy (5)	22	17	31	27	21	118		Doubtful	18	14	30	27	29	Reliable
								Out of place	16	14	32	25	31	Adapted to the situation
	Score
	1	2	3	4	5	Total
(1) Useless - Useful (5)	11	15	25	24	43	118
	Score
	1	2	3	4	5	Total
(1) Confused - Clear (5)	19	12	22	28	37	118
	Score
	1	2	3	4	5	Total
(1) Bored - Lively (5)	21	15	45	20	17	118
	Score
	1	2	3	4	5	Total
(1) No interest - Of interest (5)	12	11	23	26	46	118
	Score
	1	2	3	4	5	Total
(1) Doubtful - Reliable (5)	18	14	30	27	29	118
	Score
	1	2	3	4	5	Total
(1) Out of place - Adapted to the situation (5)	16	14	32	25	31	118

## Sheet: E03
Scenario 03 data analysis
								Negative Category	1	2	3	4	5	Positive Category
	Score							Annoying	22	13	27	28	28	Pleasant
	1	2	3	4	5	Total		Complicated	12	9	30	25	42	Easy
(1) Annoying - Pleasant (5)	22	13	27	28	28	118		Unusable	4	9	15	27	63	Useful
								Confusing	7	9	20	32	50	Clear
	Score							Boring	15	14	36	22	31	Lively
	1	2	3	4	5	Total		Uninteresting	4	9	15	28	62	Interesting
(1) Complicated - Easy (5)	12	9	30	25	42	118		Doubtful	6	11	22	28	51	Reliable
								Out of place	10	5	22	24	57	Adapted to the situation
	Score
	1	2	3	4	5	Total
(1) Useless - Useful (5)	4	9	15	27	63	118
	Score
	1	2	3	4	5	Total
(1) Confused - Clear (5)	7	9	20	32	50	118
	Score
	1	2	3	4	5	Total
(1) Bored - Lively (5)	15	14	36	22	31	118
	Score
	1	2	3	4	5	Total
(1) No interest - Of interest (5)	4	9	15	28	62	118
	Score
	1	2	3	4	5	Total
(1) Doubtful - Reliable (5)	6	11	22	28	51	118
	Score
	1	2	3	4	5	Total
(1) Out of place - Adapted to the situation (5)	10	5	22	24	57	118

## Sheet: E04
Scenario 04 data analysis
								Negative Category	1	2	3	4	5	Positive Category
	Score							Annoying	35	12	20	26	25	Pleasant
	1	2	3	4	5	Total		Complicated	24	14	27	20	33	Easy
(1) Annoying - Pleasant (5)	35	12	20	26	25	118		Unusable	9	8	19	27	55	Useful
								Confusing	13	8	20	32	45	Clear
	Score							Boring	19	13	36	28	22	Lively
	1	2	3	4	5	Total		Uninteresting	5	7	20	23	63	Interesting
(1) Complicated - Easy (5)	24	14	27	20	33	118		Doubtful	15	5	26	33	39	Reliable
								Out of place	15	4	19	30	50	Adapted to the situation
	Score
	1	2	3	4	5	Total
(1) Useless - Useful (5)	9	8	19	27	55	118
	Score
	1	2	3	4	5	Total
(1) Confused - Clear (5)	13	8	20	32	45	118
	Score
	1	2	3	4	5	Total
(1) Bored - Lively (5)	19	13	36	28	22	118
	Score
	1	2	3	4	5	Total
(1) No interest - Of interest (5)	5	7	20	23	63	118
	Score
	1	2	3	4	5	Total
(1) Doubtful - Reliable (5)	15	5	26	33	39	118
	Score
	1	2	3	4	5	Total
(1) Out of place - Adapted to the situation (5)	15	4	19	30	50	118

## Sheet: E05
Scenario 05 data analysis
								Negative Category	1	2	3	4	5	Positive Category
	Score							Annoying	23	10	23	30	32	Pleasant
	1	2	3	4	5	Total		Complicated	7	10	23	29	49	Easy
(1) Annoying - Pleasant (5)	23	10	23	30	32	118		Unusable	5	9	17	27	60	Useful
								Confusing	7	8	19	30	54	Clear
	Score							Boring	8	15	40	21	34	Lively
	1	2	3	4	5	Total		Uninteresting	4	9	18	29	58	Interesting
(1) Complicated - Easy (5)	7	10	23	29	49	118		Doubtful	5	8	25	32	48	Reliable
								Out of place	6	6	22	24	60	Adapted to the situation
	Score
	1	2	3	4	5	Total
(1) Useless - Useful (5)	5	9	17	27	60	118
	Score
	1	2	3	4	5	Total
(1) Confused - Clear (5)	7	8	19	30	54	118
	Score
	1	2	3	4	5	Total
(1) Bored - Lively (5)	8	15	40	21	34	118
	Score
	1	2	3	4	5	Total
(1) No interest - Of interest (5)	4	9	18	29	58	118
	Score
	1	2	3	4	5	Total
(1) Doubtful - Reliable (5)	5	8	25	32	48	118
	Score
	1	2	3	4	5	Total
(1) Out of place - Adapted to the situation (5)	6	6	22	24	60	118

## Sheet: DF1
Frecuency								%
Negative Category	1	2	3	4	5	Positive Category		Negative Category	1	2	3	4	5	Positive Category
Annoying	31	22	30	20	15	Pleasant		Annoying	26.2712	18.6441	25.4237	16.9492	12.7119	Pleasant
Complicated	14	20	31	23	30	Easy		Complicated	11.8644	16.9492	26.2712	19.4915	25.4237	Easy
Unusable	16	8	28	26	40	Useful		Unusable	13.5593	6.77966	23.7288	22.0339	33.8983	Useful
Confusing	18	17	24	23	36	Clear		Confusing	15.2542	14.4068	20.339	19.4915	30.5085	Clear
Boring	20	20	31	19	28	Lively		Boring	16.9492	16.9492	26.2712	16.1017	23.7288	Lively
Uninteresting	16	12	30	25	35	Interesting		Uninteresting	13.5593	10.1695	25.4237	21.1864	29.661	Interesting
Doubtful	22	19	33	23	21	Reliable		Doubtful	18.6441	16.1017	27.9661	19.4915	17.7966	Reliable
Out of place	29	20	26	20	23	Adapted to the situation		Out of place	24.5763	16.9492	22.0339	16.9492	19.4915	Adapted to the situation

## Sheet: DF2
Frecuency								%
Negative Category	1	2	3	4	5	Positive Category		Negative Category	1	2	3	4	5	Positive Category
Annoying	38	19	30	20	11	Pleasant		Annoying	32.2034	16.1017	25.4237	16.9492	9.32203	Pleasant
Complicated	22	17	31	27	21	Easy		Complicated	18.6441	14.4068	26.2712	22.8814	17.7966	Easy
Unusable	11	15	25	24	43	Useful		Unusable	9.32203	12.7119	21.1864	20.339	36.4407	Useful
Confusing	19	12	22	28	37	Clear		Confusing	16.1017	10.1695	18.6441	23.7288	31.3559	Clear
Boring	21	15	45	20	17	Lively		Boring	17.7966	12.7119	38.1356	16.9492	14.4068	Lively
Uninteresting	12	11	23	26	46	Interesting		Uninteresting	10.1695	9.32203	19.4915	22.0339	38.9831	Interesting
Doubtful	18	14	30	27	29	Reliable		Doubtful	15.2542	11.8644	25.4237	22.8814	24.5763	Reliable
Out of place	16	14	32	25	31	Adapted to the situation		Out of place	13.5593	11.8644	27.1186	21.1864	26.2712	Adapted to the situation

[truncated: 4 more sheets: DF3, DF4, DF5, Average]
