# Supplementary material for: Automatic generation of explanations in autonomous systems: enhancing human interaction in smart home environments
Source: PeerJ Comput Sci. 2025 Aug 29;11:e3041. doi: 10.7717/peerj-cs.3041 (PMC12453768; doi:10.7717/peerj-cs.3041)
Supplement: Supplemental Information 2 [file peerj-cs-11-3041-s002.xlsx]

## Sheet: Dictionary
	Dataset Dictionary
	Explanation-event				Criteria that make it possible to produce the explanation.
	Explanation-action				Information (LOG) in the smart home domain depending on the scenario.
	Explanation-condition				User data.
	Part-01				Prompt used to generate the explanation. This prompt is accompanied by the LOG* and user data.
	Part-02				Explanation produced by the LLM.
	Part-03				Length and characters of the explanation generated by the LLM.
	Part-04
	Type
	Level-of-attention
	Oral-message
	Refrigerator
	Refrigerator-Quantity-Products
	Refrigerator-Stock-Level
	Service-Purchase
	User-Confirmation
	Date-and-time
	Main-door
	Bedroom-door
	Bedroom-Light
	State-Bed
	Office-Door
	Office-Light
	TV
	Couch
	Washer-Machine
	Washing-machine-state
	System-Weather
	Ambient-temperature
	Rain-State
	Camera-Security
	Storage-Cloud-Server-Security
	Intruder-Detection
	AirConditioner-Cold
	AirConditioner-Hot
	Oven
	Oven-State
	Batidor
	Washer-Dish
	Kettle
	Kettle-State
	Kitchen-door
	Kitchen-Light
	Cooking-Plate
	Kitchen-air-extractor-fan
	Kitchen-air-extractor-fan-State
	Microwave
	Microwave-State
	Tash
	Bathroom-Light
	BathroomDoor-Lock
	Bathroom-Door
	Windows-kitchen
	Windows-main-room
	Windows-office
	Users-Garden
	Irrigation-System
	Pressure-Sprinkler-01
	Pressure-Sprinkler-02
	Air-Quality-Meter
	Level-Quality-Air
	Air-Sanitation-System
	Users-home
	User-Rest
	Age-user
	Level-experience-devices
	Prompt
	Explanation-ChatGPT
	Characters
	Words

## Sheet: Dataset
				Part-explanation
	Explanation-event	Explanation-action	Explanation-condition	Part-01	Part-02	Part-03	Part-04	Type	Level-of-attention	Oral-message	Refrigerator	Refrigerator-Quantity-Products	Refrigerator-Stock-Level	Service-Purchase	User-Confirmation	Date-and-time	Main-door	Bedroom-door	Bedroom-Light	State-Bed	Office-Door	Office-Light	TV	Couch	Washer-Machine	Washing-machine-state	System-Weather	Ambient-temperature	Rain-State	Camera-Security	Storage-Cloud-Server-Security	Intruder-Detection	AirConditioner-Cold	AirConditioner-Hot	Oven	Oven-State	Batidor	Washer-Dish	Kettle	Kettle-State	Kitchen-door	Kitchen-Light	Cooking-Plate	Kitchen-air-extractor-fan	Kitchen-air-extractor-fan-State	Microwave	Microwave-State	Tash	Bathroom-Light
1	Detection of Low Stock	Purchase Request	Null	What	Null	Null	Null	Feedback	High	True	ON	0	Low	Null	Null	08/05/2024 10:54:05	Closed	Closed	OFF	Unemployed	Open	OFF	OFF	OFF	OFF	OFF	ON	35°	0 mm	ON	ON	0	ON	OFF	OFF	OFF	OFF	OFF	OFF	OFF	Closed	OFF	OFF	OFF	OFF	OFF	OFF	Medium	OFF
2	Detection of Low Stock	Purchase Request	Null	What	Null	Null	Null	Feedback	Low	True	ON	1	Low	Null	Null	08/05/2024 16:54:05	Closed	Closed	OFF	Unemployed	Open	OFF	OFF	OFF	OFF	OFF	ON	35°	0 mm	ON	ON	0	ON	OFF	OFF	OFF	OFF	OFF	OFF	OFF	Closed	OFF	OFF	OFF	OFF	OFF	OFF	Medium	OFF
3	Detection of Low Stock	Purchase Request	Null	What	Null	Null	Null	Feedback	Medium	True	ON	2	Low	Null	Null	08/05/2024 20:54:05	Closed	Closed	OFF	Unemployed	Closed	OFF	OFF	OFF	OFF	OFF	ON	25°	0 mm	ON	ON	0	OFF	OFF	OFF	OFF	OFF	OFF	OFF	OFF	Closed	OFF	OFF	OFF	OFF	OFF	OFF	Medium	OFF
4	Detection of Low Stock	Purchase Request	Null	What	Why	Null	Null	Feedback	High	True	ON	0	Low	Null	Null	08/05/2024 10:54:05	Closed	Closed	OFF	Unemployed	Open	OFF	OFF	OFF	OFF	OFF	ON	35°	0 mm	ON	ON	0	ON	OFF	OFF	OFF	OFF	OFF	OFF	OFF	Closed	OFF	OFF	OFF	OFF	OFF	OFF	Medium	OFF
5	Detection of Low Stock	Purchase Request	Null	What	Why	Null	Null	Feedback	Low	True	ON	1	Low	Null	Null	08/05/2024 16:54:05	Closed	Closed	OFF	Unemployed	Open	OFF	OFF	OFF	OFF	OFF	ON	35°	0 mm	ON	ON	0	ON	OFF	OFF	OFF	OFF	OFF	OFF	OFF	Closed	OFF	OFF	OFF	OFF	OFF	OFF	Medium	OFF
6	Detection of Low Stock	Purchase Request	Null	What	Why	Null	Null	Feedback	Medium	True	ON	2	Low	Null	Null	08/05/2024 20:54:05	Closed	Closed	OFF	Unemployed	Closed	OFF	OFF	OFF	OFF	OFF	ON	25°	0 mm	ON	ON	0	OFF	OFF	OFF	OFF	OFF	OFF	OFF	OFF	Closed	OFF	OFF	OFF	OFF	OFF	OFF	Medium	OFF
7	Detection of Low Stock	Purchase Request	Null	What	Null	Null	How	Feedback	High	True	ON	0	Low	Null	Null	08/05/2024 10:54:05	Closed	Closed	OFF	Unemployed	Open	OFF	OFF	OFF	OFF	OFF	ON	35°	0 mm	ON	ON	0	ON	OFF	OFF	OFF	OFF	OFF	OFF	OFF	Closed	OFF	OFF	OFF	OFF	OFF	OFF	Medium	OFF
8	Detection of Low Stock	Purchase Request	Null	What	Null	Null	How	Feedback	Low	True	ON	1	Low	Null	Null	08/05/2024 16:54:05	Closed	Closed	OFF	Unemployed	Open	OFF	OFF	OFF	OFF	OFF	ON	35°	0 mm	ON	ON	0	ON	OFF	OFF	OFF	OFF	OFF	OFF	OFF	Closed	OFF	OFF	OFF	OFF	OFF	OFF	Medium	OFF
9	Detection of Low Stock	Purchase Request	Null	What	Null	Null	How	Feedback	Medium	True	ON	2	Low	Null	Null	08/05/2024 20:54:05	Closed	Closed	OFF	Unemployed	Closed	OFF	OFF	OFF	OFF	OFF	ON	25°	0 mm	ON	ON	0	OFF	OFF	OFF	OFF	OFF	OFF	OFF	OFF	Closed	OFF	OFF	OFF	OFF	OFF	OFF	Medium	OFF
10	Detection of Low Stock	Purchase Request	Null	What	Why	Null	How	Feedback	High	True	ON	0	Low	Null	Null	08/05/2024 10:54:05	Closed	Closed	OFF	Unemployed	Open	OFF	OFF	OFF	OFF	OFF	ON	35°	0 mm	ON	ON	0	ON	OFF	OFF	OFF	OFF	OFF	OFF	OFF	Closed	OFF	OFF	OFF	OFF	OFF	OFF	Medium	OFF
11	Detection of Low Stock	Purchase Request	Null	What	Why	Null	How	Feedback	Low	True	ON	1	Low	Null	Null	08/05/2024 16:54:05	Closed	Closed	OFF	Unemployed	Open	OFF	OFF	OFF	OFF	OFF	ON	35°	0 mm	ON	ON	0	ON	OFF	OFF	OFF	OFF	OFF	OFF	OFF	Closed	OFF	OFF	OFF	OFF	OFF	OFF	Medium	OFF
12	Detection of Low Stock	Purchase Request	Null	What	Why	Null	How	Feedback	Medium	True	ON	2	Low	Null	Null	08/05/2024 20:54:05	Closed	Closed	OFF	Unemployed	Closed	OFF	OFF	OFF	OFF	OFF	ON	25°	0 mm	ON	ON	0	OFF	OFF	OFF	OFF	OFF	OFF	OFF	OFF	Closed	OFF	OFF	OFF	OFF	OFF	OFF	Medium	OFF
13	Detection of Low Stock	Purchase Request	Null	What	Null	What if	Null	Feedback	High	True	ON	0	Low	Null	Null	08/05/2024 10:54:05	Closed	Closed	OFF	Unemployed	Open	OFF	OFF	OFF	OFF	OFF	ON	35°	0 mm	ON	ON	0	ON	OFF	OFF	OFF	OFF	OFF	OFF	OFF	Closed	OFF	OFF	OFF	OFF	OFF	OFF	Medium	OFF
14	Detection of Low Stock	Purchase Request	Null	What	Null	What if	Null	Feedback	Low	True	ON	1	Low	Null	Null	08/05/2024 16:54:05	Closed	Closed	OFF	Unemployed	Open	OFF	OFF	OFF	OFF	OFF	ON	35°	0 mm	ON	ON	0	ON	OFF	OFF	OFF	OFF	OFF	OFF	OFF	Closed	OFF	OFF	OFF	OFF	OFF	OFF	Medium	OFF
15	Detection of Low Stock	Purchase Request	Null	What	Null	What if	Null	Feedback	Medium	True	ON	2	Low	Null	Null	08/05/2024 20:54:05	Closed	Closed	OFF	Unemployed	Closed	OFF	OFF	OFF	OFF	OFF	ON	25°	0 mm	ON	ON	0	OFF	OFF	OFF	OFF	OFF	OFF	OFF	OFF	Closed	OFF	OFF	OFF	OFF	OFF	OFF	Medium	OFF
16	Detection of Low Stock	Purchase Request	Null	What	Null	Null	Null	Feedback	High	False	ON	0	Low	Null	Null	08/05/2024 10:54:05	Closed	Closed	OFF	Unemployed	Open	OFF	OFF	OFF	OFF	OFF	ON	35°	0 mm	ON	ON	0	ON	OFF	OFF	OFF	OFF	OFF	OFF	OFF	Closed	OFF	OFF	OFF	OFF	OFF	OFF	Medium	OFF
17	Detection of Low Stock	Purchase Request	Null	What	Null	Null	Null	Feedback	Low	False	ON	1	Low	Null	Null	08/05/2024 16:54:05	Closed	Closed	OFF	Unemployed	Open	OFF	OFF	OFF	OFF	OFF	ON	35°	0 mm	ON	ON	0	ON	OFF	OFF	OFF	OFF	OFF	OFF	OFF	Closed	OFF	OFF	OFF	OFF	OFF	OFF	Medium	OFF
18	Detection of Low Stock	Purchase Request	Null	What	Null	Null	Null	Feedback	Medium	False	ON	2	Low	Null	Null	08/05/2024 20:54:05	Closed	Closed	OFF	Unemployed	Closed	OFF	OFF	OFF	OFF	OFF	ON	25°	0 mm	ON	ON	0	OFF	OFF	OFF	OFF	OFF	OFF	OFF	OFF	Closed	OFF	OFF	OFF	OFF	OFF	OFF	Medium	OFF
19	Detection of Low Stock	Purchase Request	Null	What	Why	Null	Null	Feedback	High	False	ON	0	Low	Null	Null	08/05/2024 10:54:05	Closed	Closed	OFF	Unemployed	Open	OFF	OFF	OFF	OFF	OFF	ON	35°	0 mm	ON	ON	0	ON	OFF	OFF	OFF	OFF	OFF	OFF	OFF	Closed	OFF	OFF	OFF	OFF	OFF	OFF	Medium	OFF
20	Detection of Low Stock	Purchase Request	Null	What	Why	Null	Null	Feedback	Low	False	ON	1	Low	Null	Null	08/05/2024 16:54:05	Closed	Closed	OFF	Unemployed	Open	OFF	OFF	OFF	OFF	OFF	ON	35°	0 mm	ON	ON	0	ON	OFF	OFF	OFF	OFF	OFF	OFF	OFF	Closed	OFF	OFF	OFF	OFF	OFF	OFF	Medium	OFF
21	Detection of Low Stock	Purchase Request	Null	What	Why	Null	Null	Feedback	Medium	False	ON	2	Low	Null	Null	08/05/2024 20:54:05	Closed	Closed	OFF	Unemployed	Closed	OFF	OFF	OFF	OFF	OFF	ON	25°	0 mm	ON	ON	0	OFF	OFF	OFF	OFF	OFF	OFF	OFF	OFF	Closed	OFF	OFF	OFF	OFF	OFF	OFF	Medium	OFF
22	Detection of Low Stock	Purchase Request	Null	What	Null	Null	How	Feedback	High	False	ON	0	Low	Null	Null	08/05/2024 10:54:05	Closed	Closed	OFF	Unemployed	Open	OFF	OFF	OFF	OFF	OFF	ON	35°	0 mm	ON	ON	0	ON	OFF	OFF	OFF	OFF	OFF	OFF	OFF	Closed	OFF	OFF	OFF	OFF	OFF	OFF	Medium	OFF
23	Detection of Low Stock	Purchase Request	Null	What	Null	Null	How	Feedback	Low	False	ON	1	Low	Null	Null	08/05/2024 16:54:05	Closed	Closed	OFF	Unemployed	Open	OFF	OFF	OFF	OFF	OFF	ON	35°	0 mm	ON	ON	0	ON	OFF	OFF	OFF	OFF	OFF	OFF	OFF	Closed	OFF	OFF	OFF	OFF	OFF	OFF	Medium	OFF
24	Detection of Low Stock	Purchase Request	Null	What	Null	Null	How	Feedback	Medium	False	ON	2	Low	Null	Null	08/05/2024 20:54:05	Closed	Closed	OFF	Unemployed	Closed	OFF	OFF	OFF	OFF	OFF	ON	25°	0 mm	ON	ON	0	OFF	OFF	OFF	OFF	OFF	OFF	OFF	OFF	Closed	OFF	OFF	OFF	OFF	OFF	OFF	Medium	OFF
25	Detection of Low Stock	Purchase Request	Null	What	Why	Null	How	Feedback	High	False	ON	0	Low	Null	Null	08/05/2024 10:54:05	Closed	Closed	OFF	Unemployed	Open	OFF	OFF	OFF	OFF	OFF	ON	35°	0 mm	ON	ON	0	ON	OFF	OFF	OFF	OFF	OFF	OFF	OFF	Closed	OFF	OFF	OFF	OFF	OFF	OFF	Medium	OFF
26	Detection of Low Stock	Purchase Request	Null	What	Why	Null	How	Feedback	Low	False	ON	1	Low	Null	Null	08/05/2024 16:54:05	Closed	Closed	OFF	Unemployed	Open	OFF	OFF	OFF	OFF	OFF	ON	35°	0 mm	ON	ON	0	ON	OFF	OFF	OFF	OFF	OFF	OFF	OFF	Closed	OFF	OFF	OFF	OFF	OFF	OFF	Medium	OFF
27	Detection of Low Stock	Purchase Request	Null	What	Why	Null	How	Feedback	Medium	False	ON	2	Low	Null	Null	08/05/2024 20:54:05	Closed	Closed	OFF	Unemployed	Closed	OFF	OFF	OFF	OFF	OFF	ON	25°	0 mm	ON	ON	0	OFF	OFF	OFF	OFF	OFF	OFF	OFF	OFF	Closed	OFF	OFF	OFF	OFF	OFF	OFF	Medium	OFF
28	Detection of Low Stock	Purchase Request	Null	What	Null	What if	Null	Feedback	High	False	ON	0	Low	Null	Null	08/05/2024 10:54:05	Closed	Closed	OFF	Unemployed	Open	OFF	OFF	OFF	OFF	OFF	ON	35°	0 mm	ON	ON	0	ON	OFF	OFF	OFF	OFF	OFF	OFF	OFF	Closed	OFF	OFF	OFF	OFF	OFF	OFF	Medium	OFF
29	Detection of Low Stock	Purchase Request	Null	What	Null	What if	Null	Feedback	Low	False	ON	1	Low	Null	Null	08/05/2024 16:54:05	Closed	Closed	OFF	Unemployed	Open	OFF	OFF	OFF	OFF	OFF	ON	35°	0 mm	ON	ON	0	ON	OFF	OFF	OFF	OFF	OFF	OFF	OFF	Closed	OFF	OFF	OFF	OFF	OFF	OFF	Medium	OFF
30	Detection of Low Stock	Purchase Request	Null	What	Null	What if	Null	Feedback	Medium	False	ON	2	Low	Null	Null	08/05/2024 20:54:05	Closed	Closed	OFF	Unemployed	Closed	OFF	OFF	OFF	OFF	OFF	ON	25°	0 mm	ON	ON	0	OFF	OFF	OFF	OFF	OFF	OFF	OFF	OFF	Closed	OFF	OFF	OFF	OFF	OFF	OFF	Medium	OFF
31	Auxiliary Supermarket Purchase	Purchase Request	Purchase Service Not Responding and Quantity of Products = 0	What	Null	Null	Null	Feedback-Adaptation	High	True	ON	0	Low	Null	Null	08/05/2024 10:54:05	Closed	Closed	OFF	Unemployed	Open	OFF	OFF	OFF	OFF	OFF	ON	35°	0 mm	ON	ON	0	ON	OFF	OFF	OFF	OFF	OFF	OFF	OFF	Closed	OFF	OFF	OFF	OFF	OFF	OFF	Medium	OFF
32	Auxiliary Supermarket Purchase	Purchase Request	Purchase Service Not Responding and Quantity of Products = 0	What	Null	Null	Null	Feedback-Adaptation	Low	True	ON	0	Low	Null	Null	08/05/2024 16:54:05	Closed	Closed	OFF	Unemployed	Open	OFF	OFF	OFF	OFF	OFF	ON	35°	0 mm	ON	ON	0	ON	OFF	OFF	OFF	OFF	OFF	OFF	OFF	Closed	OFF	OFF	OFF	OFF	OFF	OFF	Medium	OFF
33	Auxiliary Supermarket Purchase	Purchase Request	Purchase Service Not Responding and Quantity of Products = 0	What	Null	Null	Null	Feedback-Adaptation	Medium	True	ON	0	Low	Null	Null	08/05/2024 20:54:05	Closed	Closed	OFF	Unemployed	Closed	OFF	OFF	OFF	OFF	OFF	ON	25°	0 mm	ON	ON	0	OFF	OFF	OFF	OFF	OFF	OFF	OFF	OFF	Closed	OFF	OFF	OFF	OFF	OFF	OFF	Medium	OFF
34	Auxiliary Supermarket Purchase	Purchase Request	Purchase Service Not Responding and Quantity of Products = 0	What	Why	Null	Null	Feedback-Adaptation	High	True	ON	0	Low	Null	Null	08/05/2024 10:54:05	Closed	Closed	OFF	Unemployed	Open	OFF	OFF	OFF	OFF	OFF	ON	35°	0 mm	ON	ON	0	ON	OFF	OFF	OFF	OFF	OFF	OFF	OFF	Closed	OFF	OFF	OFF	OFF	OFF	OFF	Medium	OFF
35	Auxiliary Supermarket Purchase	Purchase Request	Purchase Service Not Responding and Quantity of Products = 0	What	Why	Null	Null	Feedback-Adaptation	Low	True	ON	0	Low	Null	Null	08/05/2024 16:54:05	Closed	Closed	OFF	Unemployed	Open	OFF	OFF	OFF	OFF	OFF	ON	35°	0 mm	ON	ON	0	ON	OFF	OFF	OFF	OFF	OFF	OFF	OFF	Closed	OFF	OFF	OFF	OFF	OFF	OFF	Medium	OFF
36	Auxiliary Supermarket Purchase	Purchase Request	Purchase Service Not Responding and Quantity of Products = 0	What	Why	Null	Null	Feedback-Adaptation	Medium	True	ON	0	Low	Null	Null	08/05/2024 20:54:05	Closed	Closed	OFF	Unemployed	Closed	OFF	OFF	OFF	OFF	OFF	ON	25°	0 mm	ON	ON	0	OFF	OFF	OFF	OFF	OFF	OFF	OFF	OFF	Closed	OFF	OFF	OFF	OFF	OFF	OFF	Medium	OFF
37	Auxiliary Supermarket Purchase	Purchase Request	Purchase Service Not Responding and Quantity of Products = 0	What	Null	Null	How	Feedback-Adaptation	High	True	ON	0	Low	Null	Null	08/05/2024 10:54:05	Closed	Closed	OFF	Unemployed	Open	OFF	OFF	OFF	OFF	OFF	ON	35°	0 mm	ON	ON	0	ON	OFF	OFF	OFF	OFF	OFF	OFF	OFF	Closed	OFF	OFF	OFF	OFF	OFF	OFF	Medium	OFF
38	Auxiliary Supermarket Purchase	Purchase Request	Purchase Service Not Responding and Quantity of Products = 0	What	Null	Null	How	Feedback-Adaptation	Low	True	ON	0	Low	Null	Null	08/05/2024 16:54:05	Closed	Closed	OFF	Unemployed	Open	OFF	OFF	OFF	OFF	OFF	ON	35°	0 mm	ON	ON	0	ON	OFF	OFF	OFF	OFF	OFF	OFF	OFF	Closed	OFF	OFF	OFF	OFF	OFF	OFF	Medium	OFF
39	Auxiliary Supermarket Purchase	Purchase Request	Purchase Service Not Responding and Quantity of Products = 0	What	Null	Null	How	Feedback-Adaptation	Medium	True	ON	0	Low	Null	Null	08/05/2024 20:54:05	Closed	Closed	OFF	Unemployed	Closed	OFF	OFF	OFF	OFF	OFF	ON	25°	0 mm	ON	ON	0	OFF	OFF	OFF	OFF	OFF	OFF	OFF	OFF	Closed	OFF	OFF	OFF	OFF	OFF	OFF	Medium	OFF
40	Auxiliary Supermarket Purchase	Purchase Request	Purchase Service Not Responding and Quantity of Products = 0	What	Why	Null	How	Feedback-Adaptation	High	True	ON	0	Low	No-response	Null	08/05/2024 10:54:05	Closed	Closed	OFF	Unemployed	Open	OFF	OFF	OFF	OFF	OFF	ON	35°	0 mm	ON	ON	0	ON	OFF	OFF	OFF	OFF	OFF	OFF	OFF	Closed	OFF	OFF	OFF	OFF	OFF	OFF	Medium	OFF
41	Auxiliary Supermarket Purchase	Purchase Request	Purchase Service Not Responding and Quantity of Products = 0	What	Why	Null	How	Feedback-Adaptation	Low	True	ON	0	Low	No-response	Null	08/05/2024 16:54:05	Closed	Closed	OFF	Unemployed	Open	OFF	OFF	OFF	OFF	OFF	ON	35°	0 mm	ON	ON	0	ON	OFF	OFF	OFF	OFF	OFF	OFF	OFF	Closed	OFF	OFF	OFF	OFF	OFF	OFF	Medium	OFF
42	Auxiliary Supermarket Purchase	Purchase Request	Purchase Service Not Responding and Quantity of Products = 0	What	Why	Null	How	Feedback-Adaptation	Medium	True	ON	0	Low	No-response	Null	08/05/2024 20:54:05	Closed	Closed	OFF	Unemployed	Closed	OFF	OFF	OFF	OFF	OFF	ON	25°	0 mm	ON	ON	0	OFF	OFF	OFF	OFF	OFF	OFF	OFF	OFF	Closed	OFF	OFF	OFF	OFF	OFF	OFF	Medium	OFF
43	Auxiliary Supermarket Purchase	Purchase Request	Purchase Service Not Responding and Quantity of Products = 0	What	Null	What if	Null	Feedback-Adaptation	High	True	ON	0	Low	No-response	Null	08/05/2024 10:54:05	Closed	Closed	OFF	Unemployed	Open	OFF	OFF	OFF	OFF	OFF	ON	35°	0 mm	ON	ON	0	ON	OFF	OFF	OFF	OFF	OFF	OFF	OFF	Closed	OFF	OFF	OFF	OFF	OFF	OFF	Medium	OFF
44	Auxiliary Supermarket Purchase	Purchase Request	Purchase Service Not Responding and Quantity of Products = 0	What	Null	What if	Null	Feedback-Adaptation	Low	True	ON	0	Low	No-response	Null	08/05/2024 16:54:05	Closed	Closed	OFF	Unemployed	Open	OFF	OFF	OFF	OFF	OFF	ON	35°	0 mm	ON	ON	0	ON	OFF	OFF	OFF	OFF	OFF	OFF	OFF	Closed	OFF	OFF	OFF	OFF	OFF	OFF	Medium	OFF
45	Auxiliary Supermarket Purchase	Purchase Request	Purchase Service Not Responding and Quantity of Products = 0	What	Null	What if	Null	Feedback-Adaptation	Medium	True	ON	0	Low	No-response	Null	08/05/2024 20:54:05	Closed	Closed	OFF	Unemployed	Closed	OFF	OFF	OFF	OFF	OFF	ON	25°	0 mm	ON	ON	0	OFF	OFF	OFF	OFF	OFF	OFF	OFF	OFF	Closed	OFF	OFF	OFF	OFF	OFF	OFF	Medium	OFF
46	Auxiliary Supermarket Purchase	Purchase Request	Purchase Service Not Responding and Quantity of Products = 0	What	Null	Null	Null	Feedback-Adaptation	High	False	ON	0	Low	Null	Null	08/05/2024 10:54:05	Closed	Closed	OFF	Unemployed	Open	OFF	OFF	OFF	OFF	OFF	ON	35°	0 mm	ON	ON	0	ON	OFF	OFF	OFF	OFF	OFF	OFF	OFF	Closed	OFF	OFF	OFF	OFF	OFF	OFF	Medium	OFF
47	Auxiliary Supermarket Purchase	Purchase Request	Purchase Service Not Responding and Quantity of Products = 0	What	Null	Null	Null	Feedback-Adaptation	Low	False	ON	0	Low	Null	Null	08/05/2024 16:54:05	Closed	Closed	OFF	Unemployed	Open	OFF	OFF	OFF	OFF	OFF	ON	35°	0 mm	ON	ON	0	ON	OFF	OFF	OFF	OFF	OFF	OFF	OFF	Closed	OFF	OFF	OFF	OFF	OFF	OFF	Medium	OFF
48	Auxiliary Supermarket Purchase	Purchase Request	Purchase Service Not Responding and Quantity of Products = 0	What	Null	Null	Null	Feedback-Adaptation	Medium	False	ON	0	Low	Null	Null	08/05/2024 20:54:05	Closed	Closed	OFF	Unemployed	Closed	OFF	OFF	OFF	OFF	OFF	ON	25°	0 mm	ON	ON	0	OFF	OFF	OFF	OFF	OFF	OFF	OFF	OFF	Closed	OFF	OFF	OFF	OFF	OFF	OFF	Medium	OFF
49	Auxiliary Supermarket Purchase	Purchase Request	Purchase Service Not Responding and Quantity of Products = 0	What	Why	Null	Null	Feedback-Adaptation	High	False	ON	0	Low	Null	Null	08/05/2024 10:54:05	Closed	Closed	OFF	Unemployed	Open	OFF	OFF	OFF	OFF	OFF	ON	35°	0 mm	ON	ON	0	ON	OFF	OFF	OFF	OFF	OFF	OFF	OFF	Closed	OFF	OFF	OFF	OFF	OFF	OFF	Medium	OFF
50	Auxiliary Supermarket Purchase	Purchase Request	Purchase Service Not Responding and Quantity of Products = 0	What	Why	Null	Null	Feedback-Adaptation	Low	False	ON	0	Low	Null	Null	08/05/2024 16:54:05	Closed	Closed	OFF	Unemployed	Open	OFF	OFF	OFF	OFF	OFF	ON	35°	0 mm	ON	ON	0	ON	OFF	OFF	OFF	OFF	OFF	OFF	OFF	Closed	OFF	OFF	OFF	OFF	OFF	OFF	Medium	OFF
51	Auxiliary Supermarket Purchase	Purchase Request	Purchase Service Not Responding and Quantity of Products = 0	What	Why	Null	Null	Feedback-Adaptation	Medium	False	ON	0	Low	Null	Null	08/05/2024 20:54:05	Closed	Closed	OFF	Unemployed	Closed	OFF	OFF	OFF	OFF	OFF	ON	25°	0 mm	ON	ON	0	OFF	OFF	OFF	OFF	OFF	OFF	OFF	OFF	Closed	OFF	OFF	OFF	OFF	OFF	OFF	Medium	OFF
52	Auxiliary Supermarket Purchase	Purchase Request	Purchase Service Not Responding and Quantity of Products = 0	What	Null	Null	How	Feedback-Adaptation	High	False	ON	0	Low	Null	Null	08/05/2024 10:54:05	Closed	Closed	OFF	Unemployed	Open	OFF	OFF	OFF	OFF	OFF	ON	35°	0 mm	ON	ON	0	ON	OFF	OFF	OFF	OFF	OFF	OFF	OFF	Closed	OFF	OFF	OFF	OFF	OFF	OFF	Medium	OFF
53	Auxiliary Supermarket Purchase	Purchase Request	Purchase Service Not Responding and Quantity of Products = 0	What	Null	Null	How	Feedback-Adaptation	Low	False	ON	0	Low	Null	Null	08/05/2024 16:54:05	Closed	Closed	OFF	Unemployed	Open	OFF	OFF	OFF	OFF	OFF	ON	35°	0 mm	ON	ON	0	ON	OFF	OFF	OFF	OFF	OFF	OFF	OFF	Closed	OFF	OFF	OFF	OFF	OFF	OFF	Medium	OFF
54	Auxiliary Supermarket Purchase	Purchase Request	Purchase Service Not Responding and Quantity of Products = 0	What	Null	Null	How	Feedback-Adaptation	Medium	False	ON	0	Low	Null	Null	08/05/2024 20:54:05	Closed	Closed	OFF	Unemployed	Closed	OFF	OFF	OFF	OFF	OFF	ON	25°	0 mm	ON	ON	0	OFF	OFF	OFF	OFF	OFF	OFF	OFF	OFF	Closed	OFF	OFF	OFF	OFF	OFF	OFF	Medium	OFF
55	Auxiliary Supermarket Purchase	Purchase Request	Purchase Service Not Responding and Quantity of Products = 0	What	Why	Null	How	Feedback-Adaptation	High	False	ON	0	Low	No-response	Null	08/05/2024 10:54:05	Closed	Closed	OFF	Unemployed	Open	OFF	OFF	OFF	OFF	OFF	ON	35°	0 mm	ON	ON	0	ON	OFF	OFF	OFF	OFF	OFF	OFF	OFF	Closed	OFF	OFF	OFF	OFF	OFF	OFF	Medium	OFF
56	Auxiliary Supermarket Purchase	Purchase Request	Purchase Service Not Responding and Quantity of Products = 0	What	Why	Null	How	Feedback-Adaptation	Low	False	ON	0	Low	No-response	Null	08/05/2024 16:54:05	Closed	Closed	OFF	Unemployed	Open	OFF	OFF	OFF	OFF	OFF	ON	35°	0 mm	ON	ON	0	ON	OFF	OFF	OFF	OFF	OFF	OFF	OFF	Closed	OFF	OFF	OFF	OFF	OFF	OFF	Medium	OFF
57	Auxiliary Supermarket Purchase	Purchase Request	Purchase Service Not Responding and Quantity of Products = 0	What	Why	Null	How	Feedback-Adaptation	Medium	False	ON	0	Low	No-response	Null	08/05/2024 20:54:05	Closed	Closed	OFF	Unemployed	Closed	OFF	OFF	OFF	OFF	OFF	ON	25°	0 mm	ON	ON	0	OFF	OFF	OFF	OFF	OFF	OFF	OFF	OFF	Closed	OFF	OFF	OFF	OFF	OFF	OFF	Medium	OFF
58	Auxiliary Supermarket Purchase	Purchase Request	Purchase Service Not Responding and Quantity of Products = 0	What	Null	What if	Null	Feedback-Adaptation	High	False	ON	0	Low	No-response	Null	08/05/2024 10:54:05	Closed	Closed	OFF	Unemployed	Open	OFF	OFF	OFF	OFF	OFF	ON	35°	0 mm	ON	ON	0	ON	OFF	OFF	OFF	OFF	OFF	OFF	OFF	Closed	OFF	OFF	OFF	OFF	OFF	OFF	Medium	OFF
59	Auxiliary Supermarket Purchase	Purchase Request	Purchase Service Not Responding and Quantity of Products = 0	What	Null	What if	Null	Feedback-Adaptation	Low	False	ON	0	Low	No-response	Null	08/05/2024 16:54:05	Closed	Closed	OFF	Unemployed	Open	OFF	OFF	OFF	OFF	OFF	ON	35°	0 mm	ON	ON	0	ON	OFF	OFF	OFF	OFF	OFF	OFF	OFF	Closed	OFF	OFF	OFF	OFF	OFF	OFF	Medium	OFF
60	Auxiliary Supermarket Purchase	Purchase Request	Purchase Service Not Responding and Quantity of Products = 0	What	Null	What if	Null	Feedback-Adaptation	Medium	False	ON	0	Low	No-response	Null	08/05/2024 20:54:05	Closed	Closed	OFF	Unemployed	Closed	OFF	OFF	OFF	OFF	OFF	ON	25°	0 mm	ON	ON	0	OFF	OFF	OFF	OFF	OFF	OFF	OFF	OFF	Closed	OFF	OFF	OFF	OFF	OFF	OFF	Medium	OFF
61	Supermarket Purchase	Purchase Request	User Confirmation	What	Null	Null	Null	Feedforward	High	True	ON	0	Low	Null	Null	08/05/2024 10:54:05	Closed	Closed	OFF	Unemployed	Open	OFF	OFF	OFF	OFF	OFF	ON	35°	0 mm	ON	ON	0	ON	OFF	OFF	OFF	OFF	OFF	OFF	OFF	Closed	OFF	OFF	OFF	OFF	OFF	OFF	Medium	OFF
62	Supermarket Purchase	Purchase Request	User Confirmation	What	Null	Null	Null	Feedforward	Low	True	ON	0	Low	Null	Null	08/05/2024 16:54:05	Closed	Closed	OFF	Unemployed	Open	OFF	OFF	OFF	OFF	OFF	ON	35°	0 mm	ON	ON	0	ON	OFF	OFF	OFF	OFF	OFF	OFF	OFF	Closed	OFF	OFF	OFF	OFF	OFF	OFF	Medium	OFF
63	Supermarket Purchase	Purchase Request	User Confirmation	What	Null	Null	Null	Feedforward	Medium	True	ON	0	Low	Null	Null	08/05/2024 20:54:05	Closed	Closed	OFF	Unemployed	Closed	OFF	OFF	OFF	OFF	OFF	ON	25°	0 mm	ON	ON	0	OFF	OFF	OFF	OFF	OFF	OFF	OFF	OFF	Closed	OFF	OFF	OFF	OFF	OFF	OFF	Medium	OFF
64	Supermarket Purchase	Purchase Request	User Confirmation	What	Why	Null	Null	Feedforward	High	True	ON	0	Low	Null	Null	08/05/2024 10:54:05	Closed	Closed	OFF	Unemployed	Open	OFF	OFF	OFF	OFF	OFF	ON	35°	0 mm	ON	ON	0	ON	OFF	OFF	OFF	OFF	OFF	OFF	OFF	Closed	OFF	OFF	OFF	OFF	OFF	OFF	Medium	OFF
65	Supermarket Purchase	Purchase Request	User Confirmation	What	Why	Null	Null	Feedforward	Low	True	ON	0	Low	Null	Null	08/05/2024 16:54:05	Closed	Closed	OFF	Unemployed	Open	OFF	OFF	OFF	OFF	OFF	ON	35°	0 mm	ON	ON	0	ON	OFF	OFF	OFF	OFF	OFF	OFF	OFF	Closed	OFF	OFF	OFF	OFF	OFF	OFF	Medium	OFF
66	Supermarket Purchase	Purchase Request	User Confirmation	What	Why	Null	Null	Feedforward	Medium	True	ON	0	Low	Null	Null	08/05/2024 20:54:05	Closed	Closed	OFF	Unemployed	Closed	OFF	OFF	OFF	OFF	OFF	ON	25°	0 mm	ON	ON	0	OFF	OFF	OFF	OFF	OFF	OFF	OFF	OFF	Closed	OFF	OFF	OFF	OFF	OFF	OFF	Medium	OFF
67	Supermarket Purchase	Purchase Request	User Confirmation	What	Null	Null	How	Feedforward	High	True	ON	0	Low	Null	Null	08/05/2024 10:54:05	Closed	Closed	OFF	Unemployed	Open	OFF	OFF	OFF	OFF	OFF	ON	35°	0 mm	ON	ON	0	ON	OFF	OFF	OFF	OFF	OFF	OFF	OFF	Closed	OFF	OFF	OFF	OFF	OFF	OFF	Medium	OFF
68	Supermarket Purchase	Purchase Request	User Confirmation	What	Null	Null	How	Feedforward	Low	True	ON	0	Low	Null	Null	08/05/2024 16:54:05	Closed	Closed	OFF	Unemployed	Open	OFF	OFF	OFF	OFF	OFF	ON	35°	0 mm	ON	ON	0	ON	OFF	OFF	OFF	OFF	OFF	OFF	OFF	Closed	OFF	OFF	OFF	OFF	OFF	OFF	Medium	OFF
69	Supermarket Purchase	Purchase Request	User Confirmation	What	Null	Null	How	Feedforward	Medium	True	ON	0	Low	Null	Null	08/05/2024 20:54:05	Closed	Closed	OFF	Unemployed	Closed	OFF	OFF	OFF	OFF	OFF	ON	25°	0 mm	ON	ON	0	OFF	OFF	OFF	OFF	OFF	OFF	OFF	OFF	Closed	OFF	OFF	OFF	OFF	OFF	OFF	Medium	OFF
70	Supermarket Purchase	Purchase Request	User Confirmation	What	Why	Null	How	Feedforward	High	True	ON	0	Low	Null	Null	08/05/2024 10:54:05	Closed	Closed	OFF	Unemployed	Open	OFF	OFF	OFF	OFF	OFF	ON	35°	0 mm	ON	ON	0	ON	OFF	OFF	OFF	OFF	OFF	OFF	OFF	Closed	OFF	OFF	OFF	OFF	OFF	OFF	Medium	OFF
71	Supermarket Purchase	Purchase Request	User Confirmation	What	Why	Null	How	Feedforward	Low	True	ON	0	Low	Null	Null	08/05/2024 16:54:05	Closed	Closed	OFF	Unemployed	Open	OFF	OFF	OFF	OFF	OFF	ON	35°	0 mm	ON	ON	0	ON	OFF	OFF	OFF	OFF	OFF	OFF	OFF	Closed	OFF	OFF	OFF	OFF	OFF	OFF	Medium	OFF
72	Supermarket Purchase	Purchase Request	User Confirmation	What	Why	Null	How	Feedforward	Medium	True	ON	0	Low	Null	Null	08/05/2024 20:54:05	Closed	Closed	OFF	Unemployed	Closed	OFF	OFF	OFF	OFF	OFF	ON	25°	0 mm	ON	ON	0	OFF	OFF	OFF	OFF	OFF	OFF	OFF	OFF	Closed	OFF	OFF	OFF	OFF	OFF	OFF	Medium	OFF
73	Supermarket Purchase	Purchase Request	User Confirmation	What	Null	What if	Null	Feedforward	High	True	ON	0	Low	Null	Null	08/05/2024 10:54:05	Closed	Closed	OFF	Unemployed	Open	OFF	OFF	OFF	OFF	OFF	ON	35°	0 mm	ON	ON	0	ON	OFF	OFF	OFF	OFF	OFF	OFF	OFF	Closed	OFF	OFF	OFF	OFF	OFF	OFF	Medium	OFF
74	Supermarket Purchase	Purchase Request	User Confirmation	What	Null	What if	Null	Feedforward	Low	True	ON	0	Low	Null	Null	08/05/2024 16:54:05	Closed	Closed	OFF	Unemployed	Open	OFF	OFF	OFF	OFF	OFF	ON	35°	0 mm	ON	ON	0	ON	OFF	OFF	OFF	OFF	OFF	OFF	OFF	Closed	OFF	OFF	OFF	OFF	OFF	OFF	Medium	OFF
75	Supermarket Purchase	Purchase Request	User Confirmation	What	Null	What if	Null	Feedforward	Medium	True	ON	0	Low	Null	Null	08/05/2024 20:54:05	Closed	Closed	OFF	Unemployed	Closed	OFF	OFF	OFF	OFF	OFF	ON	25°	0 mm	ON	ON	0	OFF	OFF	OFF	OFF	OFF	OFF	OFF	OFF	Closed	OFF	OFF	OFF	OFF	OFF	OFF	Medium	OFF
76	Supermarket Purchase	Purchase Request	User Confirmation	What	Null	Null	Null	Feedforward	High	False	ON	0	Low	Null	Null	08/05/2024 10:54:05	Closed	Closed	OFF	Unemployed	Open	OFF	OFF	OFF	OFF	OFF	ON	35°	0 mm	ON	ON	0	ON	OFF	OFF	OFF	OFF	OFF	OFF	OFF	Closed	OFF	OFF	OFF	OFF	OFF	OFF	Medium	OFF
77	Supermarket Purchase	Purchase Request	User Confirmation	What	Null	Null	Null	Feedforward	Low	False	ON	0	Low	Null	Null	08/05/2024 16:54:05	Closed	Closed	OFF	Unemployed	Open	OFF	OFF	OFF	OFF	OFF	ON	35°	0 mm	ON	ON	0	ON	OFF	OFF	OFF	OFF	OFF	OFF	OFF	Closed	OFF	OFF	OFF	OFF	OFF	OFF	Medium	OFF
78	Supermarket Purchase	Purchase Request	User Confirmation	What	Null	Null	Null	Feedforward	Medium	False	ON	0	Low	Null	Null	08/05/2024 20:54:05	Closed	Closed	OFF	Unemployed	Closed	OFF	OFF	OFF	OFF	OFF	ON	25°	0 mm	ON	ON	0	OFF	OFF	OFF	OFF	OFF	OFF	OFF	OFF	Closed	OFF	OFF	OFF	OFF	OFF	OFF	Medium	OFF
79	Supermarket Purchase	Purchase Request	User Confirmation	What	Why	Null	Null	Feedforward	High	False	ON	0	Low	Null	Null	08/05/2024 10:54:05	Closed	Closed	OFF	Unemployed	Open	OFF	OFF	OFF	OFF	OFF	ON	35°	0 mm	ON	ON	0	ON	OFF	OFF	OFF	OFF	OFF	OFF	OFF	Closed	OFF	OFF	OFF	OFF	OFF	OFF	Medium	OFF
80	Supermarket Purchase	Purchase Request	User Confirmation	What	Why	Null	Null	Feedforward	Low	False	ON	0	Low	Null	Null	08/05/2024 16:54:05	Closed	Closed	OFF	Unemployed	Open	OFF	OFF	OFF	OFF	OFF	ON	35°	0 mm	ON	ON	0	ON	OFF	OFF	OFF	OFF	OFF	OFF	OFF	Closed	OFF	OFF	OFF	OFF	OFF	OFF	Medium	OFF
81	Supermarket Purchase	Purchase Request	User Confirmation	What	Why	Null	Null	Feedforward	Medium	False	ON	0	Low	Null	Null	08/05/2024 20:54:05	Closed	Closed	OFF	Unemployed	Closed	OFF	OFF	OFF	OFF	OFF	ON	25°	0 mm	ON	ON	0	OFF	OFF	OFF	OFF	OFF	OFF	OFF	OFF	Closed	OFF	OFF	OFF	OFF	OFF	OFF	Medium	OFF
82	Supermarket Purchase	Purchase Request	User Confirmation	What	Null	Null	How	Feedforward	High	False	ON	0	Low	Null	Null	08/05/2024 10:54:05	Closed	Closed	OFF	Unemployed	Open	OFF	OFF	OFF	OFF	OFF	ON	35°	0 mm	ON	ON	0	ON	OFF	OFF	OFF	OFF	OFF	OFF	OFF	Closed	OFF	OFF	OFF	OFF	OFF	OFF	Medium	OFF
83	Supermarket Purchase	Purchase Request	User Confirmation	What	Null	Null	How	Feedforward	Low	False	ON	0	Low	Null	Null	08/05/2024 16:54:05	Closed	Closed	OFF	Unemployed	Open	OFF	OFF	OFF	OFF	OFF	ON	35°	0 mm	ON	ON	0	ON	OFF	OFF	OFF	OFF	OFF	OFF	OFF	Closed	OFF	OFF	OFF	OFF	OFF	OFF	Medium	OFF
84	Supermarket Purchase	Purchase Request	User Confirmation	What	Null	Null	How	Feedforward	Medium	False	ON	0	Low	Null	Null	08/05/2024 20:54:05	Closed	Closed	OFF	Unemployed	Closed	OFF	OFF	OFF	OFF	OFF	ON	25°	0 mm	ON	ON	0	OFF	OFF	OFF	OFF	OFF	OFF	OFF	OFF	Closed	OFF	OFF	OFF	OFF	OFF	OFF	Medium	OFF
85	Supermarket Purchase	Purchase Request	User Confirmation	What	Why	Null	How	Feedforward	High	False	ON	0	Low	Null	Null	08/05/2024 10:54:05	Closed	Closed	OFF	Unemployed	Open	OFF	OFF	OFF	OFF	OFF	ON	35°	0 mm	ON	ON	0	ON	OFF	OFF	OFF	OFF	OFF	OFF	OFF	Closed	OFF	OFF	OFF	OFF	OFF	OFF	Medium	OFF
86	Supermarket Purchase	Purchase Request	User Confirmation	What	Why	Null	How	Feedforward	Low	False	ON	0	Low	Null	Null	08/05/2024 16:54:05	Closed	Closed	OFF	Unemployed	Open	OFF	OFF	OFF	OFF	OFF	ON	35°	0 mm	ON	ON	0	ON	OFF	OFF	OFF	OFF	OFF	OFF	OFF	Closed	OFF	OFF	OFF	OFF	OFF	OFF	Medium	OFF
87	Supermarket Purchase	Purchase Request	User Confirmation	What	Why	Null	How	Feedforward	Medium	False	ON	0	Low	Null	Null	08/05/2024 20:54:05	Closed	Closed	OFF	Unemployed	Closed	OFF	OFF	OFF	OFF	OFF	ON	25°	0 mm	ON	ON	0	OFF	OFF	OFF	OFF	OFF	OFF	OFF	OFF	Closed	OFF	OFF	OFF	OFF	OFF	OFF	Medium	OFF
88	Supermarket Purchase	Purchase Request	User Confirmation	What	Null	What if	Null	Feedforward	High	False	ON	0	Low	Null	Null	08/05/2024 10:54:05	Closed	Closed	OFF	Unemployed	Open	OFF	OFF	OFF	OFF	OFF	ON	35°	0 mm	ON	ON	0	ON	OFF	OFF	OFF	OFF	OFF	OFF	OFF	Closed	OFF	OFF	OFF	OFF	OFF	OFF	Medium	OFF
89	Supermarket Purchase	Purchase Request	User Confirmation	What	Null	What if	Null	Feedforward	Low	False	ON	0	Low	Null	Null	08/05/2024 16:54:05	Closed	Closed	OFF	Unemployed	Open	OFF	OFF	OFF	OFF	OFF	ON	35°	0 mm	ON	ON	0	ON	OFF	OFF	OFF	OFF	OFF	OFF	OFF	Closed	OFF	OFF	OFF	OFF	OFF	OFF	Medium	OFF
90	Supermarket Purchase	Purchase Request	User Confirmation	What	Null	What if	Null	Feedforward	Medium	False	ON	0	Low	Null	Null	08/05/2024 20:54:05	Closed	Closed	OFF	Unemployed	Closed	OFF	OFF	OFF	OFF	OFF	ON	25°	0 mm	ON	ON	0	OFF	OFF	OFF	OFF	OFF	OFF	OFF	OFF	Closed	OFF	OFF	OFF	OFF	OFF	OFF	Medium	OFF
91	Watering Time	Activate Sprinklers	No users in the garden	What	Null	Null	Null	Feedback	High	True	ON	5	Medium	Null	Null	08/05/2024 10:54:05	Closed	Closed	OFF	Unemployed	Open	OFF	OFF	OFF	OFF	OFF	ON	35°	0 mm	ON	ON	0	ON	OFF	OFF	OFF	OFF	OFF	OFF	OFF	Closed	OFF	OFF	OFF	OFF	OFF	OFF	Medium	OFF
92	Watering Time	Activate Sprinklers	No users in the garden	What	Null	Null	Null	Feedback	Low	True	ON	6	Medium	Null	Null	08/05/2024 16:54:05	Closed	Closed	OFF	Unemployed	Open	OFF	OFF	OFF	OFF	OFF	ON	35°	0 mm	ON	ON	0	ON	OFF	OFF	OFF	OFF	OFF	OFF	OFF	Closed	OFF	OFF	OFF	OFF	OFF	OFF	Medium	OFF
93	Watering Time	Activate Sprinklers	No users in the garden	What	Null	Null	Null	Feedback	Medium	True	ON	7	Medium	Null	Null	08/05/2024 18:54:05	Closed	Closed	OFF	Unemployed	Closed	OFF	OFF	OFF	OFF	OFF	ON	25°	0 mm	ON	ON	0	OFF	OFF	OFF	OFF	OFF	OFF	OFF	OFF	Closed	OFF	OFF	OFF	OFF	OFF	OFF	Medium	OFF
94	Watering Time	Suspend Sprinklers	Rain Detected = True	What	Null	Null	Null	Feedback-Adaptation	High	True	ON	8	Medium	Null	Null	08/05/2024 10:54:06	Closed	Closed	OFF	Unemployed	Open	OFF	OFF	OFF	OFF	OFF	ON	35°	3 mm	ON	ON	0	ON	OFF	OFF	OFF	OFF	OFF	OFF	OFF	Closed	OFF	OFF	OFF	OFF	OFF	OFF	Medium	OFF
95	Watering Time	Suspend Sprinklers	Rain Detected = True	What	Null	Null	Null	Feedback-Adaptation	Low	True	ON	9	Medium	Null	Null	08/05/2024 16:54:06	Closed	Closed	OFF	Unemployed	Open	OFF	OFF	OFF	OFF	OFF	ON	35°	2 mm	ON	ON	0	ON	OFF	OFF	OFF	OFF	OFF	OFF	OFF	Closed	OFF	OFF	OFF	OFF	OFF	OFF	Medium	OFF
96	Watering Time	Suspend Sprinklers	Rain Detected = True	What	Null	Null	Null	Feedback-Adaptation	Medium	True	ON	10	Medium	Null	Null	08/05/2024 18:54:06	Closed	Closed	OFF	Unemployed	Closed	OFF	OFF	OFF	OFF	OFF	ON	25°	3 mm	ON	ON	0	OFF	OFF	OFF	OFF	OFF	OFF	OFF	OFF	Closed	OFF	OFF	OFF	OFF	OFF	OFF	Medium	OFF
97	Anomalous Pressure	Manual Adjustment	Sprinkler Pressure > 50 PSI	What	Null	Null	Null	Feedforward	High	True	ON	8	Medium	Null	Null	08/05/2024 10:54:06	Closed	Closed	OFF	Unemployed	Open	OFF	OFF	OFF	OFF	OFF	ON	35°	3 mm	ON	ON	0	ON	OFF	OFF	OFF	OFF	OFF	OFF	OFF	Closed	OFF	OFF	OFF	OFF	OFF	OFF	Medium	OFF
98	Anomalous Pressure	Manual Adjustment	Sprinkler Pressure > 50 PSI	What	Null	Null	Null	Feedforward	Low	True	ON	9	Medium	Null	Null	08/05/2024 16:54:06	Closed	Closed	OFF	Unemployed	Open	OFF	OFF	OFF	OFF	OFF	ON	35°	2 mm	ON	ON	0	ON	OFF	OFF	OFF	OFF	OFF	OFF	OFF	Closed	OFF	OFF	OFF	OFF	OFF	OFF	Medium	OFF
99	Anomalous Pressure	Manual Adjustment	Sprinkler Pressure > 50 PSI	What	Null	Null	Null	Feedforward	Medium	True	ON	10	Medium	Null	Null	08/05/2024 18:54:06	Closed	Closed	OFF	Unemployed	Closed	OFF	OFF	OFF	OFF	OFF	ON	25°	3 mm	ON	ON	0	OFF	OFF	OFF	OFF	OFF	OFF	OFF	OFF	Closed	OFF	OFF	OFF	OFF	OFF	OFF	Medium	OFF
100	Low Air Quality	Activate Air Sanitation	CO2 level > 100 & House Users > 0	What	Null	Null	Null	Feedback	High	True	ON	5	Medium	Null	Null	08/05/2024 10:54:05	Closed	Closed	OFF	Unemployed	Open	OFF	OFF	OFF	OFF	OFF	ON	35°	0 mm	ON	ON	0	ON	OFF	OFF	OFF	OFF	OFF	OFF	OFF	Closed	OFF	OFF	OFF	OFF	OFF	OFF	Medium	OFF
101	Low Air Quality	Activate Air Sanitation	CO2 level > 100 & House Users > 0	What	Null	Null	Null	Feedback	Low	True	ON	6	Medium	Null	Null	08/05/2024 16:54:05	Closed	Closed	OFF	Unemployed	Open	OFF	OFF	OFF	OFF	OFF	ON	35°	0 mm	ON	ON	0	ON	OFF	OFF	OFF	OFF	OFF	OFF	OFF	Closed	OFF	OFF	OFF	OFF	OFF	OFF	Medium	OFF
102	Low Air Quality	Activate Air Sanitation	CO2 level > 100 & House Users > 0	What	Null	Null	Null	Feedback	Medium	True	ON	7	Medium	Null	Null	08/05/2024 18:54:05	Closed	Closed	OFF	Unemployed	Closed	OFF	OFF	OFF	OFF	OFF	ON	25°	0 mm	ON	ON	0	OFF	OFF	OFF	OFF	OFF	OFF	OFF	OFF	Closed	OFF	OFF	OFF	OFF	OFF	OFF	Medium	OFF
103	System Upgrade	Lock Temperature Controller	Null	What	Null	Null	Null	Feedback-Adaptation	High	True	ON	5	Medium	Null	Null	08/05/2024 10:54:05	Closed	Closed	OFF	Unemployed	Open	OFF	OFF	OFF	OFF	OFF	ON	35°	0 mm	ON	ON	0	UPDATE	UPDATE	OFF	OFF	OFF	OFF	OFF	OFF	Closed	OFF	OFF	OFF	OFF	OFF	OFF	Medium	OFF
104	System Upgrade	Lock Temperature Controller	Null	What	Null	Null	Null	Feedback-Adaptation	Low	True	ON	6	Medium	Null	Null	08/05/2024 16:54:05	Closed	Closed	OFF	Unemployed	Open	OFF	OFF	OFF	OFF	OFF	ON	35°	0 mm	ON	ON	0	UPDATE	UPDATE	OFF	OFF	OFF	OFF	OFF	OFF	Closed	OFF	OFF	OFF	OFF	OFF	OFF	Medium	OFF
105	System Upgrade	Lock Temperature Controller	Null	What	Null	Null	Null	Feedback-Adaptation	Medium	True	ON	7	Medium	Null	Null	08/05/2024 18:54:05	Closed	Closed	OFF	Unemployed	Closed	OFF	OFF	OFF	OFF	OFF	ON	25°	0 mm	ON	ON	0	UPDATE	UPDATE	OFF	OFF	OFF	OFF	OFF	OFF	Closed	OFF	OFF	OFF	OFF	OFF	OFF	Medium	OFF
106	Intruder Detection	Activate Alarm	Null	What	Null	Null	Null	Feedback	High	True	ON	5	Medium	Null	Null	08/05/2024 10:54:05	Closed	Closed	OFF	Unemployed	Open	OFF	OFF	OFF	OFF	OFF	ON	35°	0 mm	ON	ON	1	ON	OFF	OFF	OFF	OFF	OFF	OFF	OFF	Closed	OFF	OFF	OFF	OFF	OFF	OFF	Medium	OFF
107	Intruder Detection	Activate Alarm	Null	What	Null	Null	Null	Feedback	Low	True	ON	6	Medium	Null	Null	08/05/2024 16:54:05	Closed	Closed	OFF	Unemployed	Open	OFF	OFF	OFF	OFF	OFF	ON	35°	0 mm	ON	ON	1	ON	OFF	OFF	OFF	OFF	OFF	OFF	OFF	Closed	OFF	OFF	OFF	OFF	OFF	OFF	Medium	OFF
108	Intruder Detection	Activate Alarm	Null	What	Null	Null	Null	Feedback	Medium	True	ON	7	Medium	Null	Null	08/05/2024 18:54:05	Closed	Closed	OFF	Unemployed	Closed	OFF	OFF	OFF	OFF	OFF	ON	25°	0 mm	ON	ON	1	OFF	OFF	OFF	OFF	OFF	OFF	OFF	OFF	Closed	OFF	OFF	OFF	OFF	OFF	OFF	Medium	OFF
109	Lost Connection Server Security	Save data on local server	Null	What	Null	Null	Null	Feedback-Adaptation	High	True	ON	5	Medium	Null	Null	08/05/2024 10:54:05	Closed	Closed	OFF	Unemployed	Open	OFF	OFF	OFF	OFF	OFF	ON	35°	0 mm	ON	OFF	0	ON	OFF	OFF	OFF	OFF	OFF	OFF	OFF	Closed	OFF	OFF	OFF	OFF	OFF	OFF	Medium	OFF
110	Lost Connection Server Security	Save data on local server	Null	What	Null	Null	Null	Feedback-Adaptation	Low	True	ON	6	Medium	Null	Null	08/05/2024 16:54:05	Closed	Closed	OFF	Unemployed	Open	OFF	OFF	OFF	OFF	OFF	ON	35°	0 mm	ON	OFF	0	ON	OFF	OFF	OFF	OFF	OFF	OFF	OFF	Closed	OFF	OFF	OFF	OFF	OFF	OFF	Medium	OFF
111	Lost Connection Server Security	Save data on local server	Null	What	Null	Null	Null	Feedback-Adaptation	Medium	True	ON	7	Medium	Null	Null	08/05/2024 18:54:05	Closed	Closed	OFF	Unemployed	Closed	OFF	OFF	OFF	OFF	OFF	ON	25°	0 mm	ON	OFF	0	OFF	OFF	OFF	OFF	OFF	OFF	OFF	OFF	Closed	OFF	OFF	OFF	OFF	OFF	OFF	Medium	OFF
112	Turn on Heating	Close Manual Window	Window-Open = false	What	Null	Null	Null	Feedforward	High	True	ON	5	Medium	Null	Null	08/05/2024 10:54:05	Closed	Closed	OFF	Unemployed	Open	OFF	OFF	OFF	OFF	OFF	ON	5°	0 mm	ON	ON	0	OFF	OFF	OFF	OFF	OFF	OFF	OFF	OFF	Closed	OFF	OFF	OFF	OFF	OFF	OFF	Medium	OFF
113	Turn on Heating	Close Manual Window	Window-Open = false	What	Null	Null	Null	Feedforward	Low	True	ON	6	Medium	Null	Null	08/05/2024 16:54:05	Closed	Closed	OFF	Unemployed	Open	OFF	OFF	OFF	OFF	OFF	ON	5°	0 mm	ON	ON	0	OFF	OFF	OFF	OFF	OFF	OFF	OFF	OFF	Closed	OFF	OFF	OFF	OFF	OFF	OFF	Medium	OFF
114	Turn on Heating	Close Manual Window	Window-Open = false	What	Null	Null	Null	Feedforward	Medium	True	ON	7	Medium	Null	Null	08/05/2024 18:54:05	Closed	Closed	OFF	Unemployed	Closed	OFF	OFF	OFF	OFF	OFF	ON	5°	0 mm	ON	ON	0	OFF	OFF	OFF	OFF	OFF	OFF	OFF	OFF	Closed	OFF	OFF	OFF	OFF	OFF	OFF	Medium	OFF
115	User Rest	Enable System Security	User Confirmation = true	What	Null	Null	Null	Feedforward	High	True	ON	5	Medium	Null	Null	08/05/2024 23:54:05	Closed	Closed	ON	Busy	Closed	OFF	OFF	OFF	OFF	OFF	ON	35°	0 mm	ON	ON	0	OFF	OFF	OFF	OFF	OFF	OFF	OFF	OFF	Closed	OFF	OFF	OFF	OFF	OFF	OFF	Medium	OFF
116	User Rest	Enable System Security	User Confirmation = true	What	Null	Null	Null	Feedforward	Low	True	ON	6	Medium	Null	Null	09/05/2024 22:54:05	Closed	Closed	ON	Busy	Closed	OFF	OFF	OFF	OFF	OFF	ON	35°	0 mm	ON	ON	0	OFF	OFF	OFF	OFF	OFF	OFF	OFF	OFF	Closed	OFF	OFF	OFF	OFF	OFF	OFF	Medium	OFF
117	User Rest	Enable System Security	User Confirmation = true	What	Null	Null	Null	Feedforward	Medium	True	ON	7	Medium	Null	Null	10/05/2024 23:43:05	Closed	Closed	ON	Busy	Closed	OFF	OFF	OFF	OFF	OFF	ON	25°	0 mm	ON	ON	0	OFF	OFF	OFF	OFF	OFF	OFF	OFF	OFF	Closed	OFF	OFF	OFF	OFF	OFF	OFF	Medium	OFF
118	Watering Time	Activate Sprinklers	No users in the garden	What	Null	Null	Null	Feedback	High	False	ON	5	Medium	Null	Null	08/05/2024 10:54:05	Closed	Closed	OFF	Unemployed	Open	OFF	OFF	OFF	OFF	OFF	ON	35°	0 mm	ON	ON	0	ON	OFF	OFF	OFF	OFF	OFF	OFF	OFF	Closed	OFF	OFF	OFF	OFF	OFF	OFF	Medium	OFF
119	Watering Time	Activate Sprinklers	No users in the garden	What	Null	Null	Null	Feedback	Low	False	ON	6	Medium	Null	Null	08/05/2024 16:54:05	Closed	Closed	OFF	Unemployed	Open	OFF	OFF	OFF	OFF	OFF	ON	35°	0 mm	ON	ON	0	ON	OFF	OFF	OFF	OFF	OFF	OFF	OFF	Closed	OFF	OFF	OFF	OFF	OFF	OFF	Medium	OFF
120	Watering Time	Activate Sprinklers	No users in the garden	What	Null	Null	Null	Feedback	Medium	False	ON	7	Medium	Null	Null	08/05/2024 18:54:05	Closed	Closed	OFF	Unemployed	Closed	OFF	OFF	OFF	OFF	OFF	ON	25°	0 mm	ON	ON	0	OFF	OFF	OFF	OFF	OFF	OFF	OFF	OFF	Closed	OFF	OFF	OFF	OFF	OFF	OFF	Medium	OFF
121	Watering Time	Suspend Sprinklers	Rain Detected = True	What	Null	Null	Null	Feedback-Adaptation	High	False	ON	8	Medium	Null	Null	08/05/2024 10:54:06	Closed	Closed	OFF	Unemployed	Open	OFF	OFF	OFF	OFF	OFF	ON	35°	3 mm	ON	ON	0	ON	OFF	OFF	OFF	OFF	OFF	OFF	OFF	Closed	OFF	OFF	OFF	OFF	OFF	OFF	Medium	OFF
122	Watering Time	Suspend Sprinklers	Rain Detected = True	What	Null	Null	Null	Feedback-Adaptation	Low	False	ON	9	Medium	Null	Null	08/05/2024 16:54:06	Closed	Closed	OFF	Unemployed	Open	OFF	OFF	OFF	OFF	OFF	ON	35°	2 mm	ON	ON	0	ON	OFF	OFF	OFF	OFF	OFF	OFF	OFF	Closed	OFF	OFF	OFF	OFF	OFF	OFF	Medium	OFF
123	Watering Time	Suspend Sprinklers	Rain Detected = True	What	Null	Null	Null	Feedback-Adaptation	Medium	False	ON	10	Medium	Null	Null	08/05/2024 18:54:06	Closed	Closed	OFF	Unemployed	Closed	OFF	OFF	OFF	OFF	OFF	ON	25°	3 mm	ON	ON	0	OFF	OFF	OFF	OFF	OFF	OFF	OFF	OFF	Closed	OFF	OFF	OFF	OFF	OFF	OFF	Medium	OFF
124	Anomalous Pressure	Manual Adjustment	Sprinkler Pressure > 50 PSI	What	Null	Null	Null	Feedforward	High	False	ON	8	Medium	Null	Null	08/05/2024 10:54:06	Closed	Closed	OFF	Unemployed	Open	OFF	OFF	OFF	OFF	OFF	ON	35°	3 mm	ON	ON	0	ON	OFF	OFF	OFF	OFF	OFF	OFF	OFF	Closed	OFF	OFF	OFF	OFF	OFF	OFF	Medium	OFF
125	Anomalous Pressure	Manual Adjustment	Sprinkler Pressure > 50 PSI	What	Null	Null	Null	Feedforward	Low	False	ON	9	Medium	Null	Null	08/05/2024 16:54:06	Closed	Closed	OFF	Unemployed	Open	OFF	OFF	OFF	OFF	OFF	ON	35°	2 mm	ON	ON	0	ON	OFF	OFF	OFF	OFF	OFF	OFF	OFF	Closed	OFF	OFF	OFF	OFF	OFF	OFF	Medium	OFF
126	Anomalous Pressure	Manual Adjustment	Sprinkler Pressure > 50 PSI	What	Null	Null	Null	Feedforward	Medium	False	ON	10	Medium	Null	Null	08/05/2024 18:54:06	Closed	Closed	OFF	Unemployed	Closed	OFF	OFF	OFF	OFF	OFF	ON	25°	3 mm	ON	ON	0	OFF	OFF	OFF	OFF	OFF	OFF	OFF	OFF	Closed	OFF	OFF	OFF	OFF	OFF	OFF	Medium	OFF
127	Low Air Quality	Activate Air Sanitation	CO2 level > 100 & House Users > 0	What	Null	Null	Null	Feedback	High	False	ON	5	Medium	Null	Null	08/05/2024 10:54:05	Closed	Closed	OFF	Unemployed	Open	OFF	OFF	OFF	OFF	OFF	ON	35°	0 mm	ON	ON	0	ON	OFF	OFF	OFF	OFF	OFF	OFF	OFF	Closed	OFF	OFF	OFF	OFF	OFF	OFF	Medium	OFF
128	Low Air Quality	Activate Air Sanitation	CO2 level > 100 & House Users > 0	What	Null	Null	Null	Feedback	Low	False	ON	6	Medium	Null	Null	08/05/2024 16:54:05	Closed	Closed	OFF	Unemployed	Open	OFF	OFF	OFF	OFF	OFF	ON	35°	0 mm	ON	ON	0	ON	OFF	OFF	OFF	OFF	OFF	OFF	OFF	Closed	OFF	OFF	OFF	OFF	OFF	OFF	Medium	OFF
129	Low Air Quality	Activate Air Sanitation	CO2 level > 100 & House Users > 0	What	Null	Null	Null	Feedback	Medium	False	ON	7	Medium	Null	Null	08/05/2024 18:54:05	Closed	Closed	OFF	Unemployed	Closed	OFF	OFF	OFF	OFF	OFF	ON	25°	0 mm	ON	ON	0	OFF	OFF	OFF	OFF	OFF	OFF	OFF	OFF	Closed	OFF	OFF	OFF	OFF	OFF	OFF	Medium	OFF
130	System Upgrade	Lock Temperature Controller	Null	What	Null	Null	Null	Feedback-Adaptation	High	False	ON	5	Medium	Null	Null	08/05/2024 10:54:05	Closed	Closed	OFF	Unemployed	Open	OFF	OFF	OFF	OFF	OFF	ON	35°	0 mm	ON	ON	0	UPDATE	UPDATE	OFF	OFF	OFF	OFF	OFF	OFF	Closed	OFF	OFF	OFF	OFF	OFF	OFF	Medium	OFF
131	System Upgrade	Lock Temperature Controller	Null	What	Null	Null	Null	Feedback-Adaptation	Low	False	ON	6	Medium	Null	Null	08/05/2024 16:54:05	Closed	Closed	OFF	Unemployed	Open	OFF	OFF	OFF	OFF	OFF	ON	35°	0 mm	ON	ON	0	UPDATE	UPDATE	OFF	OFF	OFF	OFF	OFF	OFF	Closed	OFF	OFF	OFF	OFF	OFF	OFF	Medium	OFF
132	System Upgrade	Lock Temperature Controller	Null	What	Null	Null	Null	Feedback-Adaptation	Medium	False	ON	7	Medium	Null	Null	08/05/2024 18:54:05	Closed	Closed	OFF	Unemployed	Closed	OFF	OFF	OFF	OFF	OFF	ON	25°	0 mm	ON	ON	0	UPDATE	UPDATE	OFF	OFF	OFF	OFF	OFF	OFF	Closed	OFF	OFF	OFF	OFF	OFF	OFF	Medium	OFF
133	Intruder Detection	Activate Alarm	Null	What	Null	Null	Null	Feedback	High	False	ON	5	Medium	Null	Null	08/05/2024 10:54:05	Closed	Closed	OFF	Unemployed	Open	OFF	OFF	OFF	OFF	OFF	ON	35°	0 mm	ON	ON	1	ON	OFF	OFF	OFF	OFF	OFF	OFF	OFF	Closed	OFF	OFF	OFF	OFF	OFF	OFF	Medium	OFF
134	Intruder Detection	Activate Alarm	Null	What	Null	Null	Null	Feedback	Low	False	ON	6	Medium	Null	Null	08/05/2024 16:54:05	Closed	Closed	OFF	Unemployed	Open	OFF	OFF	OFF	OFF	OFF	ON	35°	0 mm	ON	ON	1	ON	OFF	OFF	OFF	OFF	OFF	OFF	OFF	Closed	OFF	OFF	OFF	OFF	OFF	OFF	Medium	OFF
135	Intruder Detection	Activate Alarm	Null	What	Null	Null	Null	Feedback	Medium	False	ON	7	Medium	Null	Null	08/05/2024 18:54:05	Closed	Closed	OFF	Unemployed	Closed	OFF	OFF	OFF	OFF	OFF	ON	25°	0 mm	ON	ON	1	OFF	OFF	OFF	OFF	OFF	OFF	OFF	OFF	Closed	OFF	OFF	OFF	OFF	OFF	OFF	Medium	OFF
136	Lost Connection Server Security	Save data on local server	Null	What	Null	Null	Null	Feedback-Adaptation	High	False	ON	5	Medium	Null	Null	08/05/2024 10:54:05	Closed	Closed	OFF	Unemployed	Open	OFF	OFF	OFF	OFF	OFF	ON	35°	0 mm	ON	OFF	0	ON	OFF	OFF	OFF	OFF	OFF	OFF	OFF	Closed	OFF	OFF	OFF	OFF	OFF	OFF	Medium	OFF
137	Lost Connection Server Security	Save data on local server	Null	What	Null	Null	Null	Feedback-Adaptation	Low	False	ON	6	Medium	Null	Null	08/05/2024 16:54:05	Closed	Closed	OFF	Unemployed	Open	OFF	OFF	OFF	OFF	OFF	ON	35°	0 mm	ON	OFF	0	ON	OFF	OFF	OFF	OFF	OFF	OFF	OFF	Closed	OFF	OFF	OFF	OFF	OFF	OFF	Medium	OFF
138	Lost Connection Server Security	Save data on local server	Null	What	Null	Null	Null	Feedback-Adaptation	Medium	False	ON	7	Medium	Null	Null	08/05/2024 18:54:05	Closed	Closed	OFF	Unemployed	Closed	OFF	OFF	OFF	OFF	OFF	ON	25°	0 mm	ON	OFF	0	OFF	OFF	OFF	OFF	OFF	OFF	OFF	OFF	Closed	OFF	OFF	OFF	OFF	OFF	OFF	Medium	OFF
139	Turn on Heating	Close Manual Window	Window-Open = false	What	Null	Null	Null	Feedforward	High	False	ON	5	Medium	Null	Null	08/05/2024 10:54:05	Closed	Closed	OFF	Unemployed	Open	OFF	OFF	OFF	OFF	OFF	ON	5°	0 mm	ON	ON	0	OFF	OFF	OFF	OFF	OFF	OFF	OFF	OFF	Closed	OFF	OFF	OFF	OFF	OFF	OFF	Medium	OFF
140	Turn on Heating	Close Manual Window	Window-Open = false	What	Null	Null	Null	Feedforward	Low	False	ON	6	Medium	Null	Null	08/05/2024 16:54:05	Closed	Closed	OFF	Unemployed	Open	OFF	OFF	OFF	OFF	OFF	ON	5°	0 mm	ON	ON	0	OFF	OFF	OFF	OFF	OFF	OFF	OFF	OFF	Closed	OFF	OFF	OFF	OFF	OFF	OFF	Medium	OFF
141	Turn on Heating	Close Manual Window	Window-Open = false	What	Null	Null	Null	Feedforward	Medium	False	ON	7	Medium	Null	Null	08/05/2024 18:54:05	Closed	Closed	OFF	Unemployed	Closed	OFF	OFF	OFF	OFF	OFF	ON	5°	0 mm	ON	ON	0	OFF	OFF	OFF	OFF	OFF	OFF	OFF	OFF	Closed	OFF	OFF	OFF	OFF	OFF	OFF	Medium	OFF
142	User Rest	Enable System Security	User Confirmation = true	What	Null	Null	Null	Feedforward	High	False	ON	5	Medium	Null	Null	08/05/2024 23:54:05	Closed	Closed	ON	Busy	Closed	OFF	OFF	OFF	OFF	OFF	ON	35°	0 mm	ON	ON	0	OFF	OFF	OFF	OFF	OFF	OFF	OFF	OFF	Closed	OFF	OFF	OFF	OFF	OFF	OFF	Medium	OFF
143	User Rest	Enable System Security	User Confirmation = true	What	Null	Null	Null	Feedforward	Low	False	ON	6	Medium	Null	Null	09/05/2024 22:54:05	Closed	Closed	ON	Busy	Closed	OFF	OFF	OFF	OFF	OFF	ON	35°	0 mm	ON	ON	0	OFF	OFF	OFF	OFF	OFF	OFF	OFF	OFF	Closed	OFF	OFF	OFF	OFF	OFF	OFF	Medium	OFF
144	User Rest	Enable System Security	User Confirmation = true	What	Null	Null	Null	Feedforward	Medium	False	ON	7	Medium	Null	Null	10/05/2024 23:43:05	Closed	Closed	ON	Busy	Closed	OFF	OFF	OFF	OFF	OFF	ON	25°	0 mm	ON	ON	0	OFF	OFF	OFF	OFF	OFF	OFF	OFF	OFF	Closed	OFF	OFF	OFF	OFF	OFF	OFF	Medium	OFF
145	User Rest	Enable System Security	User Confirmation = true	What	Null	Null	Null	Feedforward	High	True	ON	5	Medium	Null	False	08/05/2024 23:54:05	Closed	Closed	ON	Busy	Closed	OFF	OFF	OFF	OFF	OFF	ON	35°	0 mm	ON	ON	0	OFF	OFF	OFF	OFF	OFF	OFF	OFF	OFF	Closed	OFF	OFF	OFF	OFF	OFF	OFF	Medium	OFF
146	User Rest	Enable System Security	User Confirmation = true	What	Null	Null	Null	Feedforward	Low	True	ON	6	Medium	Null	False	09/05/2024 22:54:05	Closed	Closed	ON	Busy	Closed	OFF	OFF	OFF	OFF	OFF	ON	35°	0 mm	ON	ON	0	OFF	OFF	OFF	OFF	OFF	OFF	OFF	OFF	Closed	OFF	OFF	OFF	OFF	OFF	OFF	Medium	OFF
147	User Rest	Enable System Security	User Confirmation = true	What	Null	Null	Null	Feedforward	Medium	True	ON	7	Medium	Null	False	10/05/2024 23:43:05	Closed	Closed	ON	Busy	Closed	OFF	OFF	OFF	OFF	OFF	ON	25°	0 mm	ON	ON	0	OFF	OFF	OFF	OFF	OFF	OFF	OFF	OFF	Closed	OFF	OFF	OFF	OFF	OFF	OFF	Medium	OFF
148	User Rest	Enable System Security	User Confirmation = true	What	Null	Null	Null	Feedforward	High	False	ON	5	Medium	Null	False	08/05/2024 23:54:05	Closed	Closed	ON	Busy	Closed	OFF	OFF	OFF	OFF	OFF	ON	35°	0 mm	ON	ON	0	OFF	OFF	OFF	OFF	OFF	OFF	OFF	OFF	Closed	OFF	OFF	OFF	OFF	OFF	OFF	Medium	OFF
149	User Rest	Enable System Security	User Confirmation = true	What	Null	Null	Null	Feedforward	Low	False	ON	6	Medium	Null	False	09/05/2024 22:54:05	Closed	Closed	ON	Busy	Closed	OFF	OFF	OFF	OFF	OFF	ON	35°	0 mm	ON	ON	0	OFF	OFF	OFF	OFF	OFF	OFF	OFF	OFF	Closed	OFF	OFF	OFF	OFF	OFF	OFF	Medium	OFF
150	User Rest	Enable System Security	User Confirmation = true	What	Null	Null	Null	Feedforward	Medium	False	ON	7	Medium	Null	False	10/05/2024 23:43:05	Closed	Closed	ON	Busy	Closed	OFF	OFF	OFF	OFF	OFF	ON	25°	0 mm	ON	ON	0	OFF	OFF	OFF	OFF	OFF	OFF	OFF	OFF	Closed	OFF	OFF	OFF	OFF	OFF	OFF	Medium	OFF
151	Anomalous Pressure	Manual Adjustment	Sprinkler Pressure > 50 PSI	What	Null	Null	Null	Feedforward	High	True	ON	8	Medium	Null	Null	08/05/2024 10:54:06	Closed	Closed	OFF	Unemployed	Open	OFF	OFF	OFF	OFF	OFF	ON	35°	3 mm	ON	ON	0	ON	OFF	OFF	OFF	OFF	OFF	OFF	OFF	Closed	OFF	OFF	OFF	OFF	OFF	OFF	Medium	OFF
152	Anomalous Pressure	Manual Adjustment	Sprinkler Pressure > 50 PSI	What	Null	Null	Null	Feedforward	Low	True	ON	9	Medium	Null	Null	08/05/2024 16:54:06	Closed	Closed	OFF	Unemployed	Open	OFF	OFF	OFF	OFF	OFF	ON	35°	2 mm	ON	ON	0	ON	OFF	OFF	OFF	OFF	OFF	OFF	OFF	Closed	OFF	OFF	OFF	OFF	OFF	OFF	Medium	OFF
153	Anomalous Pressure	Manual Adjustment	Sprinkler Pressure > 50 PSI	What	Null	Null	Null	Feedforward	Medium	True	ON	10	Medium	Null	Null	08/05/2024 18:54:06	Closed	Closed	OFF	Unemployed	Closed	OFF	OFF	OFF	OFF	OFF	ON	25°	3 mm	ON	ON	0	OFF	OFF	OFF	OFF	OFF	OFF	OFF	OFF	Closed	OFF	OFF	OFF	OFF	OFF	OFF	Medium	OFF
154	Anomalous Pressure	Manual Adjustment	Sprinkler Pressure > 50 PSI	What	Null	Null	Null	Feedforward	High	False	ON	8	Medium	Null	Null	08/05/2024 10:54:06	Closed	Closed	OFF	Unemployed	Open	OFF	OFF	OFF	OFF	OFF	ON	35°	3 mm	ON	ON	0	ON	OFF	OFF	OFF	OFF	OFF	OFF	OFF	Closed	OFF	OFF	OFF	OFF	OFF	OFF	Medium	OFF
155	Anomalous Pressure	Manual Adjustment	Sprinkler Pressure > 50 PSI	What	Null	Null	Null	Feedforward	Low	False	ON	9	Medium	Null	Null	08/05/2024 16:54:06	Closed	Closed	OFF	Unemployed	Open	OFF	OFF	OFF	OFF	OFF	ON	35°	2 mm	ON	ON	0	ON	OFF	OFF	OFF	OFF	OFF	OFF	OFF	Closed	OFF	OFF	OFF	OFF	OFF	OFF	Medium	OFF
156	Anomalous Pressure	Manual Adjustment	Sprinkler Pressure > 50 PSI	What	Null	Null	Null	Feedforward	Medium	False	ON	10	Medium	Null	Null	08/05/2024 18:54:06	Closed	Closed	OFF	Unemployed	Closed	OFF	OFF	OFF	OFF	OFF	ON	25°	3 mm	ON	ON	0	OFF	OFF	OFF	OFF	OFF	OFF	OFF	OFF	Closed	OFF	OFF	OFF	OFF	OFF	OFF	Medium	OFF
157	Turn on Heating	Close Manual Window	Window-Open = false	What	Null	Null	Null	Feedforward	High	True	ON	5	Medium	Null	Null	08/05/2024 10:54:05	Closed	Closed	OFF	Unemployed	Open	OFF	OFF	OFF	OFF	OFF	ON	5°	0 mm	ON	ON	0	OFF	OFF	OFF	OFF	OFF	OFF	OFF	OFF	Closed	OFF	OFF	OFF	OFF	OFF	OFF	Medium	OFF
158	Turn on Heating	Close Manual Window	Window-Open = false	What	Null	Null	Null	Feedforward	Low	True	ON	6	Medium	Null	Null	08/05/2024 16:54:05	Closed	Closed	OFF	Unemployed	Open	OFF	OFF	OFF	OFF	OFF	ON	5°	0 mm	ON	ON	0	OFF	OFF	OFF	OFF	OFF	OFF	OFF	OFF	Closed	OFF	OFF	OFF	OFF	OFF	OFF	Medium	OFF
159	Turn on Heating	Close Manual Window	Window-Open = false	What	Null	Null	Null	Feedforward	Medium	True	ON	7	Medium	Null	Null	08/05/2024 18:54:05	Closed	Closed	OFF	Unemployed	Closed	OFF	OFF	OFF	OFF	OFF	ON	5°	0 mm	ON	ON	0	OFF	OFF	OFF	OFF	OFF	OFF	OFF	OFF	Closed	OFF	OFF	OFF	OFF	OFF	OFF	Medium	OFF
160	Turn on Heating	Close Manual Window	Window-Open = false	What	Null	Null	Null	Feedforward	High	False	ON	5	Medium	Null	Null	08/05/2024 10:54:05	Closed	Closed	OFF	Unemployed	Open	OFF	OFF	OFF	OFF	OFF	ON	5°	0 mm	ON	ON	0	OFF	OFF	OFF	OFF	OFF	OFF	OFF	OFF	Closed	OFF	OFF	OFF	OFF	OFF	OFF	Medium	OFF
161	Turn on Heating	Close Manual Window	Window-Open = false	What	Null	Null	Null	Feedforward	Low	False	ON	6	Medium	Null	Null	08/05/2024 16:54:05	Closed	Closed	OFF	Unemployed	Open	OFF	OFF	OFF	OFF	OFF	ON	5°	0 mm	ON	ON	0	OFF	OFF	OFF	OFF	OFF	OFF	OFF	OFF	Closed	OFF	OFF	OFF	OFF	OFF	OFF	Medium	OFF
162	Turn on Heating	Close Manual Window	Window-Open = false	What	Null	Null	Null	Feedforward	Medium	False	ON	7	Medium	Null	Null	08/05/2024 18:54:05	Closed	Closed	OFF	Unemployed	Closed	OFF	OFF	OFF	OFF	OFF	ON	5°	0 mm	ON	ON	0	OFF	OFF	OFF	OFF	OFF	OFF	OFF	OFF	Closed	OFF	OFF	OFF	OFF	OFF	OFF	Medium	OFF
163	Supermarket Purchase	Purchase Request	User Confirmation = true	What	Null	Null	Null	Feedforward	High	True	ON	0	Low	Wait	Null	08/05/2024 10:54:05	Closed	Closed	OFF	Unemployed	Open	OFF	OFF	OFF	OFF	OFF	ON	35°	0 mm	ON	ON	0	ON	OFF	OFF	OFF	OFF	OFF	OFF	OFF	Closed	OFF	OFF	OFF	OFF	OFF	OFF	Medium	OFF
164	Supermarket Purchase	Purchase Request	User Confirmation = true	What	Null	Null	Null	Feedforward	Low	True	ON	0	Low	Wait	Null	08/05/2024 16:54:05	Closed	Closed	OFF	Unemployed	Open	OFF	OFF	OFF	OFF	OFF	ON	35°	0 mm	ON	ON	0	ON	OFF	OFF	OFF	OFF	OFF	OFF	OFF	Closed	OFF	OFF	OFF	OFF	OFF	OFF	Medium	OFF
165	Supermarket Purchase	Purchase Request	User Confirmation = true	What	Null	Null	Null	Feedforward	Medium	True	ON	0	Low	Wait	Null	08/05/2024 20:54:05	Closed	Closed	OFF	Unemployed	Closed	OFF	OFF	OFF	OFF	OFF	ON	25°	0 mm	ON	ON	0	OFF	OFF	OFF	OFF	OFF	OFF	OFF	OFF	Closed	OFF	OFF	OFF	OFF	OFF	OFF	Medium	OFF
166	Supermarket Purchase	Purchase Request	User Confirmation = true	What	Null	Null	Null	Feedforward	High	False	ON	0	Low	Wait	Null	08/05/2024 10:54:05	Closed	Closed	OFF	Unemployed	Open	OFF	OFF	OFF	OFF	OFF	ON	35°	0 mm	ON	ON	0	ON	OFF	OFF	OFF	OFF	OFF	OFF	OFF	Closed	OFF	OFF	OFF	OFF	OFF	OFF	Medium	OFF
167	Supermarket Purchase	Purchase Request	User Confirmation = true	What	Null	Null	Null	Feedforward	Low	False	ON	0	Low	Wait	Null	08/05/2024 16:54:05	Closed	Closed	OFF	Unemployed	Open	OFF	OFF	OFF	OFF	OFF	ON	35°	0 mm	ON	ON	0	ON	OFF	OFF	OFF	OFF	OFF	OFF	OFF	Closed	OFF	OFF	OFF	OFF	OFF	OFF	Medium	OFF
168	Supermarket Purchase	Purchase Request	User Confirmation = true	What	Null	Null	Null	Feedforward	Medium	False	ON	0	Low	Wait	Null	08/05/2024 20:54:05	Closed	Closed	OFF	Unemployed	Closed	OFF	OFF	OFF	OFF	OFF	ON	25°	0 mm	ON	ON	0	OFF	OFF	OFF	OFF	OFF	OFF	OFF	OFF	Closed	OFF	OFF	OFF	OFF	OFF	OFF	Medium	OFF
169	Routine Maintenance Alert	Optimize Energy Consumption	User Confirmation	What	Null	Null	Null	Feedback	Low	True	OFF	34	High	Null	True	08/05/2024 20:54:05	Closed	Closed	ON	Empty	Closed	OFF	ON	OFF	ON	ON	ON	33	0 mm	ON	ON	0	ON	OFF	OFF	OFF	OFF	ON	OFF	OFF	Closed	ON	ON	OFF	ON	OFF	OFF	Medium	Closed
170	Network Latency Issue	Initiate Cooling Protocol	Purchase Service Not Responding and Quantity of Products = 0	What	Null	Null	Null	Feedback	Medium	True	OFF	0	Low	Null	Null	08/05/2024 20:54:06	Closed	Closed	OFF	Empty	Closed	ON	OFF	OFF	OFF	OFF	ON	26	0 mm	OFF	ON	0	OFF	ON	OFF	OFF	ON	OFF	OFF	ON	Closed	OFF	ON	ON	OFF	OFF	ON	Medium	Open
171	System Overheating	Run Diagnostic Tests	Window-Open = false	What	Null	Null	Null	Feedback	High	True	ON	7	Low	Null	Null	08/05/2024 20:54:07	Open	Closed	OFF	Empty	Open	ON	ON	OFF	OFF	ON	ON	24	0 mm	OFF	ON	0	ON	OFF	OFF	OFF	OFF	OFF	ON	ON	Closed	OFF	OFF	ON	OFF	OFF	ON	Medium	Closed
172	Unauthorized Access Detected	Lock System	Null	What	Why	Null	How	Feedback	Low	True	OFF	9	Low	Null	Null	08/05/2024 20:54:08	Closed	Closed	OFF	Empty	Closed	OFF	OFF	OFF	OFF	OFF	ON	19	3 mm	ON	ON	0	OFF	ON	ON	ON	OFF	OFF	ON	OFF	Closed	ON	ON	ON	ON	ON	OFF	Medium	Open
173	Device Firmware Update Needed	Optimize Energy Consumption	Sprinkler Pressure > 50 PSI	What	Why	Null	How	Feedback	Medium	True	ON	8	Low	Null	Null	08/05/2024 20:54:09	Open	Open	ON	Occupied	Open	OFF	ON	OFF	OFF	ON	ON	21	2 mm	ON	ON	0	ON	OFF	OFF	OFF	OFF	ON	OFF	OFF	Closed	OFF	ON	OFF	ON	ON	OFF	Medium	Closed
174	Temperature Sensor Failure	Notify Security Personnel	Null	What	Why	Null	How	Feedback	High	True	ON	17	Medium	Null	Null	08/05/2024 20:54:10	Open	Open	ON	Empty	Closed	OFF	OFF	OFF	OFF	OFF	ON	15	3 mm	ON	ON	0	OFF	ON	ON	ON	OFF	ON	OFF	OFF	Closed	OFF	OFF	ON	ON	ON	ON	Medium	Open
175	Unauthorized Access Detected	Dispatch Maintenance Team	No users in the garden	What	Why	Null	How	Feedback	Low	True	OFF	16	Medium	Null	Null	08/05/2024 20:54:11	Closed	Open	OFF	Occupied	Closed	ON	ON	OFF	ON	OFF	ON	18	3 mm	ON	ON	0	OFF	ON	OFF	OFF	OFF	OFF	ON	ON	Closed	OFF	OFF	OFF	ON	OFF	ON	Medium	Closed
176	Unusual Activity Detected	Activate Fire Suppression System	Rain Detected = True	What	Why	Null	How	Feedback-Adaptation	Medium	True	OFF	17	Medium	Null	Null	08/05/2024 20:54:12	Closed	Closed	OFF	Occupied	Closed	ON	ON	OFF	ON	ON	ON	25	42 mm	OFF	ON	0	ON	ON	ON	OFF	ON	ON	ON	ON	Closed	ON	OFF	OFF	OFF	OFF	OFF	Medium	Open
177	Routine Maintenance Alert	Optimize Energy Consumption	CO2 level > 100 & House Users > 0	What	Why	Null	How	Feedback	High	True	OFF	13	Low	Null	Null	08/05/2024 20:54:13	Closed	Open	OFF	Occupied	Open	OFF	ON	OFF	ON	OFF	ON	23	3 mm	ON	ON	0	OFF	ON	OFF	OFF	ON	ON	ON	ON	Closed	OFF	ON	OFF	OFF	ON	OFF	Medium	Open
178	Device Firmware Update Needed	Notify Security Personnel	Window-Open = false	What	Why	Null	How	Feedback	Low	False	ON	11	Low	Null	Null	08/05/2024 20:54:14	Open	Closed	ON	Empty	Closed	OFF	ON	OFF	ON	ON	ON	25	0 mm	OFF	ON	0	OFF	OFF	OFF	ON	OFF	ON	ON	OFF	Closed	ON	ON	OFF	ON	OFF	OFF	Medium	Closed
179	Network Latency Issue	Initiate Cooling Protocol	Purchase Service Not Responding and Quantity of Products = 0	What	Null	Null	Null	Feedback-Adaptation	Medium	False	ON	0	Low	Null	Null	08/05/2024 20:54:15	Open	Open	ON	Occupied	Open	ON	OFF	OFF	ON	OFF	ON	23	0 mm	ON	ON	0	OFF	OFF	ON	OFF	ON	OFF	ON	OFF	Closed	OFF	ON	OFF	ON	OFF	OFF	Medium	Closed
180	Energy Usage Spike	Send Alert to Admin	CO2 level > 100 & House Users > 0	What	Null	Null	Null	Feedback-Adaptation	High	False	ON	16	Medium	Null	Null	08/05/2024 20:54:16	Open	Open	OFF	Occupied	Open	ON	ON	ON	ON	OFF	ON	32	0 mm	ON	ON	0	OFF	OFF	OFF	OFF	ON	ON	ON	OFF	Closed	OFF	ON	ON	OFF	OFF	OFF	Medium	Closed
181	Power Surge Detected	Trigger Backup Systems	No users in the garden	What	Why	Null	Null	Feedback-Adaptation	Low	False	ON	3	Low	Null	Null	08/05/2024 20:54:17	Open	Open	ON	Empty	Closed	ON	ON	ON	ON	ON	ON	20	0 mm	ON	ON	0	OFF	OFF	OFF	ON	OFF	ON	OFF	OFF	Closed	ON	ON	ON	ON	ON	ON	Medium	Closed
182	Smoke Alarm Triggered	Lock System	User Confirmation = true	What	Why	Null	Null	Feedback	Medium	False	ON	15	Medium	Null	True	08/05/2024 20:54:18	Closed	Closed	ON	Occupied	Closed	OFF	OFF	ON	ON	OFF	ON	16	0 mm	OFF	ON	0	OFF	OFF	ON	ON	ON	OFF	ON	ON	Closed	ON	OFF	ON	OFF	OFF	OFF	Medium	Open
183	Water Leak Identified	Send Alert to Admin	CO2 level > 100 & House Users > 0	What	Why	Null	Null	Feedback-Adaptation	High	False	OFF	42	High	Null	Null	08/05/2024 20:54:19	Open	Closed	ON	Empty	Open	ON	ON	ON	OFF	OFF	ON	33	0 mm	ON	ON	0	OFF	OFF	OFF	OFF	OFF	ON	ON	ON	Closed	ON	ON	ON	OFF	ON	ON	Medium	Open
184	Energy Usage Spike	Send Alert to Admin	CO2 level > 100 & House Users > 0	What	Why	Null	Null	Feedback	Low	False	ON	18	Medium	Null	Null	08/05/2024 20:54:20	Open	Closed	ON	Occupied	Closed	ON	ON	OFF	ON	OFF	ON	23	0 mm	OFF	ON	0	OFF	OFF	OFF	ON	OFF	ON	OFF	ON	Closed	OFF	ON	OFF	OFF	ON	OFF	Medium	Open
185	Unexpected Shutdown	Dispatch Maintenance Team	Purchase Service Not Responding and Quantity of Products = 0	What	Why	Null	Null	Feedback-Adaptation	Medium	False	OFF	0	Low	Null	Null	08/05/2024 20:54:21	Closed	Closed	OFF	Occupied	Open	ON	ON	OFF	ON	OFF	ON	23	0 mm	ON	ON	0	OFF	OFF	OFF	OFF	OFF	OFF	ON	OFF	Closed	ON	OFF	OFF	ON	ON	ON	Medium	Open
186	Routine Maintenance Alert	Optimize Energy Consumption	Window-Open = false	What	Why	Null	Null	Feedback-Adaptation	High	False	OFF	8	Low	Null	Null	08/05/2024 20:54:22	Open	Open	ON	Empty	Closed	ON	OFF	OFF	OFF	OFF	ON	28	0 mm	ON	ON	0	OFF	OFF	OFF	OFF	OFF	OFF	OFF	OFF	Closed	OFF	OFF	OFF	OFF	OFF	ON	Medium	Open
187	Device Firmware Update Needed	Run Diagnostic Tests	CO2 level > 100 & House Users > 0	What	Why	Null	Null	Feedback-Adaptation	Low	False	ON	9	Low	Null	Null	08/05/2024 20:54:23	Closed	Closed	ON	Occupied	Closed	ON	ON	ON	ON	OFF	ON	22	0 mm	OFF	ON	0	OFF	OFF	OFF	ON	ON	OFF	ON	OFF	Closed	ON	ON	OFF	ON	OFF	ON	Medium	Open
188	Unusual Activity Detected	Send Alert to Admin	No users in the garden	What	Why	Null	Null	Feedback	Medium	False	ON	7	Low	Null	Null	08/05/2024 20:54:24	Open	Closed	ON	Empty	Open	ON	OFF	ON	ON	OFF	ON	32	0 mm	OFF	ON	0	OFF	OFF	ON	ON	ON	OFF	OFF	ON	Closed	ON	OFF	ON	OFF	ON	OFF	Medium	Open
189	Temperature Sensor Failure	Dispatch Maintenance Team	Sprinkler Pressure > 50 PSI	What	Null	Null	Null	Feedback-Adaptation	High	False	ON	15	Medium	Null	Null	08/05/2024 20:54:25	Open	Closed	ON	Empty	Open	ON	ON	OFF	OFF	OFF	ON	32	0 mm	ON	ON	0	OFF	OFF	OFF	ON	ON	OFF	ON	ON	Closed	OFF	ON	ON	OFF	ON	OFF	Medium	Open
190	System Overheating	Dispatch Maintenance Team	Sprinkler Pressure > 50 PSI	What	Null	Null	Null	Feedback-Adaptation	Low	False	OFF	9	Medium	Null	Null	08/05/2024 20:54:26	Closed	Open	OFF	Empty	Closed	OFF	ON	OFF	ON	ON	ON	30	0 mm	OFF	ON	0	OFF	OFF	OFF	OFF	OFF	OFF	OFF	OFF	Closed	OFF	ON	ON	OFF	OFF	OFF	Medium	Closed
191	Unexpected Shutdown	Initiate Cooling Protocol	No users in the garden	What	Null	Null	Null	Feedback-Adaptation	Medium	False	ON	9	Medium	Null	Null	08/05/2024 20:54:27	Closed	Closed	OFF	Occupied	Closed	OFF	ON	OFF	ON	OFF	ON	28	0 mm	OFF	ON	0	OFF	OFF	OFF	ON	OFF	ON	OFF	OFF	Closed	OFF	OFF	OFF	ON	OFF	ON	Medium	Open
192	Water Leak Identified	Shut Down Affected Components	Window-Open = false	What	Null	Null	Null	Feedback-Adaptation	High	False	OFF	42	Medium	Null	Null	08/05/2024 20:54:28	Open	Open	ON	Occupied	Closed	OFF	ON	OFF	ON	ON	ON	31	0 mm	ON	ON	0	OFF	OFF	OFF	ON	OFF	ON	ON	OFF	Closed	ON	ON	ON	OFF	OFF	ON	Medium	Closed
193	System Overheating	Schedule Repair	No users in the garden	What	Null	Null	Null	Feedback	Low	False	ON	14	Medium	Null	Null	08/05/2024 20:54:29	Open	Open	ON	Occupied	Open	ON	ON	ON	ON	ON	ON	30	0 mm	OFF	ON	0	OFF	OFF	OFF	OFF	OFF	ON	ON	ON	Closed	OFF	OFF	OFF	ON	ON	ON	Medium	Closed
194	Temperature Sensor Failure	Initiate Cooling Protocol	User Confirmation = true	What	Null	Null	Null	Feedback	Medium	False	ON	4	Low	Null	True	08/05/2024 20:54:30	Open	Open	OFF	Occupied	Closed	OFF	ON	OFF	ON	ON	ON	20	0 mm	ON	ON	0	OFF	OFF	ON	ON	ON	OFF	OFF	ON	Closed	ON	OFF	ON	OFF	OFF	ON	Medium	Closed
195	Smoke Alarm Triggered	Optimize Energy Consumption	User Confirmation = true	What	Null	Null	Null	Feedback	High	False	ON	1	Low	Null	True	08/05/2024 20:54:31	Closed	Open	ON	Occupied	Closed	OFF	OFF	ON	ON	OFF	ON	29	0 mm	OFF	ON	0	OFF	OFF	ON	ON	ON	ON	ON	ON	Closed	OFF	OFF	OFF	ON	ON	OFF	Medium	Closed
196	Power Surge Detected	Schedule Repair	No users in the garden	What	Null	Null	Null	Feedback-Adaptation	Low	False	OFF	8	Low	Null	Null	08/05/2024 20:54:32	Open	Closed	ON	Occupied	Open	ON	ON	ON	OFF	OFF	ON	20	0 mm	ON	ON	0	OFF	OFF	ON	OFF	OFF	OFF	ON	ON	Closed	OFF	OFF	ON	OFF	OFF	OFF	Medium	Open
197	Smoke Alarm Triggered	Lock System	Purchase Service Not Responding and Quantity of Products = 0	What	Null	Null	Null	Feedback-Adaptation	Medium	False	OFF	0	Low	Null	Null	08/05/2024 20:54:33	Open	Closed	ON	Occupied	Closed	OFF	OFF	OFF	OFF	OFF	ON	20	0 mm	ON	ON	0	OFF	OFF	ON	ON	OFF	ON	ON	ON	Closed	ON	ON	OFF	OFF	OFF	OFF	Medium	Closed
198	Network Latency Issue	Notify Security Personnel	Purchase Service Not Responding and Quantity of Products = 0	What	Null	What if	Null	Feedback-Adaptation	High	False	ON	0	Low	Null	Null	08/05/2024 20:54:34	Open	Closed	ON	Occupied	Closed	ON	OFF	ON	ON	OFF	ON	30	0 mm	ON	ON	0	OFF	OFF	ON	ON	ON	OFF	OFF	OFF	Closed	OFF	OFF	OFF	ON	ON	OFF	Medium	Closed
199	Unexpected Shutdown	Send Alert to Admin	Purchase Service Not Responding and Quantity of Products = 0	What	Null	What if	Null	Feedback	Low	False	OFF	0	Low	Null	Null	08/05/2024 20:54:35	Closed	Open	OFF	Empty	Open	OFF	OFF	ON	OFF	ON	ON	28	3 mm	OFF	ON	0	OFF	OFF	OFF	OFF	OFF	OFF	ON	OFF	Closed	ON	OFF	ON	OFF	ON	ON	Medium	Open
200	Energy Usage Spike	Initiate Cooling Protocol	Purchase Service Not Responding and Quantity of Products = 0	What	Null	What if	Null	Feedback-Adaptation	Medium	False	OFF	0	Low	Null	Null	08/05/2024 20:54:36	Closed	Closed	OFF	Occupied	Closed	ON	ON	ON	OFF	OFF	ON	16	2 mm	OFF	ON	0	OFF	OFF	ON	OFF	ON	OFF	OFF	ON	Closed	OFF	ON	ON	OFF	OFF	ON	Medium	Open
201	Network Latency Issue	Trigger Backup Systems	User Confirmation = true	What	Null	What if	Null	Feedback	High	False	ON	6	Low	Null	True	08/05/2024 20:54:37	Open	Open	ON	Empty	Open	OFF	OFF	OFF	OFF	ON	ON	27	3 mm	OFF	ON	0	OFF	OFF	OFF	OFF	ON	ON	ON	OFF	Closed	ON	ON	ON	ON	ON	ON	Medium	Open
202	Energy Usage Spike	Lock System	User Confirmation = true	What	Null	What if	Null	Feedback	Low	False	ON	7	Low	Null	True	08/05/2024 20:54:38	Open	Closed	OFF	Empty	Open	OFF	ON	ON	ON	OFF	ON	24	3 mm	ON	ON	0	OFF	OFF	ON	OFF	OFF	OFF	ON	OFF	Closed	ON	ON	OFF	ON	ON	OFF	Medium	Open
203	Unauthorized Access Detected	Run Diagnostic Tests	Purchase Service Not Responding and Quantity of Products = 0	What	Null	What if	Null	Feedback-Adaptation	Medium	False	OFF	0	Low	Null	Null	08/05/2024 20:54:39	Open	Open	ON	Empty	Open	OFF	OFF	OFF	ON	OFF	ON	27	2 mm	ON	ON	0	OFF	OFF	OFF	OFF	ON	ON	ON	ON	Closed	OFF	OFF	OFF	ON	ON	ON	Medium	Open
204	Device Firmware Update Needed	Trigger Backup Systems	User Confirmation = true	What	Null	What if	Null	Feedback-Adaptation	High	False	OFF	13	Medium	Null	True	08/05/2024 20:54:40	Closed	Open	OFF	Empty	Open	ON	ON	OFF	ON	OFF	ON	22	3 mm	OFF	ON	0	OFF	OFF	ON	OFF	ON	OFF	ON	OFF	Closed	ON	ON	OFF	OFF	ON	OFF	Medium	Closed
205	Routine Maintenance Alert	Initiate Cooling Protocol	User Confirmation = true	What	Null	What if	Null	Feedback	Low	True	ON	14	Medium	Null	True	08/05/2024 20:54:41	Open	Closed	ON	Occupied	Open	ON	ON	OFF	OFF	ON	ON	19	0 mm	ON	ON	0	OFF	OFF	OFF	OFF	ON	ON	ON	OFF	Closed	OFF	ON	OFF	OFF	OFF	ON	Medium	Closed
206	Unusual Activity Detected	Activate Fire Suppression System	User Confirmation	What	Null	What if	Null	Feedback	Medium	True	ON	25	High	Null	False	08/05/2024 20:54:42	Closed	Open	OFF	Occupied	Open	OFF	ON	ON	OFF	OFF	ON	30	0 mm	OFF	ON	0	OFF	OFF	OFF	OFF	ON	ON	OFF	ON	Closed	OFF	ON	ON	OFF	OFF	OFF	Medium	Open
207	Temperature Sensor Failure	Run Diagnostic Tests	Window-Open = false	What	Null	What if	Null	Feedback	High	True	ON	19	Medium	Null	Null	08/05/2024 20:54:43	Open	Closed	OFF	Empty	Closed	ON	ON	ON	ON	ON	ON	15	0 mm	OFF	ON	0	OFF	OFF	ON	OFF	OFF	OFF	OFF	OFF	Closed	ON	OFF	ON	ON	ON	OFF	Medium	Closed
208	Network Latency Issue	Lock System	Purchase Service Not Responding and Quantity of Products = 0	What	Null	What if	Null	Feedback-Adaptation	Low	False	OFF	0	Low	Null	Null	08/05/2024 20:54:44	Closed	Open	ON	Empty	Closed	OFF	OFF	OFF	ON	OFF	ON	32	0 mm	OFF	ON	0	OFF	OFF	ON	ON	ON	OFF	OFF	OFF	Closed	OFF	ON	ON	ON	ON	OFF	Medium	Closed
209	Power Surge Detected	Lock System	Purchase Service Not Responding and Quantity of Products = 0	What	Null	What if	Null	Feedback	Medium	False	ON	0	Low	Null	Null	08/05/2024 20:54:45	Closed	Open	ON	Empty	Open	OFF	OFF	OFF	OFF	ON	ON	27	0 mm	OFF	ON	0	OFF	OFF	ON	OFF	OFF	OFF	ON	ON	Closed	ON	ON	OFF	ON	ON	OFF	Medium	Open
210	Power Surge Detected	Restart System	Purchase Service Not Responding and Quantity of Products = 0	What	Null	What if	Null	Feedback-Adaptation	High	False	OFF	0	Low	Null	Null	08/05/2024 20:54:46	Closed	Closed	OFF	Empty	Closed	ON	ON	ON	OFF	OFF	ON	20	0 mm	OFF	ON	0	OFF	OFF	ON	OFF	OFF	OFF	ON	OFF	Closed	OFF	OFF	ON	OFF	OFF	ON	Medium	Closed
211	Unauthorized Access Detected	Run Diagnostic Tests	Null	What	Null	What if	Null	Feedback	Low	True	ON	14	Medium	Null	Null	08/05/2024 20:54:47	Closed	Closed	OFF	Empty	Open	OFF	OFF	ON	ON	ON	ON	34	0 mm	ON	ON	0	OFF	OFF	ON	ON	OFF	ON	OFF	ON	Closed	ON	ON	OFF	OFF	OFF	ON	Medium	Closed
212	Water Leak Identified	Schedule Repair	CO2 level > 100 & House Users > 0	What	Null	What if	Null	Feedback-Adaptation	Medium	True	OFF	6	Low	Null	Null	08/05/2024 20:54:48	Open	Closed	OFF	Occupied	Open	ON	ON	ON	ON	OFF	ON	22	0 mm	OFF	ON	0	OFF	OFF	ON	OFF	OFF	OFF	ON	ON	Closed	ON	ON	OFF	OFF	ON	OFF	Medium	Closed
213	Unexpected Shutdown	Schedule Repair	User Confirmation	What	Null	What if	Null	Feedback-Adaptation	High	True	ON	9	Low	Null	False	08/05/2024 20:54:49	Closed	Closed	ON	Occupied	Closed	ON	ON	OFF	OFF	OFF	ON	25	0 mm	OFF	ON	0	OFF	OFF	OFF	ON	ON	OFF	OFF	OFF	Closed	OFF	ON	ON	OFF	ON	ON	Medium	Open
214	Device Firmware Update Needed	Trigger Backup Systems	No users in the garden	What	Null	Null	Null	Feedback	Low	False	ON	12	Medium	Null	Null	08/05/2024 20:54:50	Closed	Open	ON	Occupied	Open	ON	OFF	OFF	ON	OFF	ON	33	0 mm	OFF	ON	0	OFF	OFF	OFF	ON	ON	ON	OFF	OFF	Closed	OFF	OFF	ON	OFF	ON	OFF	Medium	Closed
215	System Overheating	Restart System	User Confirmation	What	Null	Null	Null	Feedback	Medium	False	OFF	14	Medium	Null	False	08/05/2024 20:54:51	Closed	Open	ON	Empty	Open	ON	ON	ON	ON	ON	ON	18	0 mm	ON	ON	0	OFF	OFF	ON	ON	OFF	OFF	OFF	OFF	Closed	ON	OFF	OFF	OFF	OFF	ON	Medium	Open
216	Unusual Activity Detected	Run Diagnostic Tests	Rain Detected = True	What	Null	Null	Null	Feedback	High	False	ON	17	Medium	Null	Null	08/05/2024 20:54:52	Open	Open	ON	Occupied	Open	OFF	ON	OFF	OFF	ON	ON	26	10 mm	ON	ON	0	OFF	OFF	OFF	OFF	ON	ON	ON	OFF	Closed	ON	ON	ON	ON	OFF	ON	Medium	Open
217	Unexpected Shutdown	Run Diagnostic Tests	CO2 level > 100 & House Users > 0	What	Null	Null	Null	Feedback	Low	True	OFF	13	Medium	Null	Null	08/05/2024 20:54:53	Closed	Closed	OFF	Occupied	Open	ON	OFF	OFF	ON	OFF	ON	29	3 mm	ON	ON	0	OFF	OFF	ON	OFF	OFF	OFF	ON	ON	Closed	OFF	OFF	ON	OFF	OFF	ON	Medium	Closed
218	Smoke Alarm Triggered	Trigger Backup Systems	CO2 level > 100 & House Users > 0	What	Null	Null	How	Feedback-Adaptation	Medium	True	OFF	40	High	Null	Null	08/05/2024 20:54:54	Closed	Closed	ON	Occupied	Open	ON	OFF	OFF	OFF	ON	ON	18	2 mm	OFF	ON	0	OFF	OFF	ON	ON	ON	OFF	OFF	OFF	Closed	ON	OFF	ON	OFF	OFF	OFF	Medium	Open
219	Power Surge Detected	Send Alert to Admin	Rain Detected = True	What	Null	Null	How	Feedback-Adaptation	High	True	OFF	26	High	Null	Null	08/05/2024 20:54:55	Open	Closed	OFF	Occupied	Closed	ON	OFF	ON	ON	ON	ON	31	13 mm	ON	ON	0	OFF	OFF	OFF	OFF	OFF	OFF	OFF	OFF	Closed	ON	ON	OFF	OFF	OFF	ON	Medium	Open
220	Water Leak Identified	Run Diagnostic Tests	User Confirmation = true	What	Null	Null	How	Feedback	Low	False	OFF	27	High	True	Null	08/05/2024 20:54:56	Closed	Open	OFF	Empty	Open	OFF	OFF	ON	ON	ON	ON	22	3 mm	ON	ON	0	OFF	OFF	OFF	ON	OFF	ON	OFF	ON	Closed	OFF	ON	OFF	ON	ON	OFF	Medium	Open
221	Unusual Activity Detected	Optimize Energy Consumption	Purchase Service Not Responding and Quantity of Products = 0	What	Null	Null	How	Feedback	Medium	False	OFF	0	Low	Null	Null	08/05/2024 20:54:57	Closed	Open	ON	Occupied	Open	ON	ON	ON	ON	OFF	ON	31	2 mm	ON	ON	0	OFF	OFF	OFF	ON	ON	OFF	ON	ON	Closed	ON	ON	ON	OFF	ON	ON	Medium	Open
222	Unexpected Shutdown	Restart System	Sprinkler Pressure > 50 PSI	What	Null	Null	How	Feedback	High	False	OFF	6	High	Null	Null	08/05/2024 20:54:58	Closed	Closed	OFF	Empty	Closed	OFF	ON	ON	OFF	ON	ON	34	3 mm	ON	ON	0	OFF	OFF	OFF	OFF	OFF	ON	ON	ON	Closed	OFF	OFF	OFF	ON	ON	OFF	Medium	Open
223	Device Firmware Update Needed	Run Diagnostic Tests	No users in the garden	What	Null	Null	How	Feedback	Low	True	OFF	6	High	Null	Null	08/05/2024 20:54:59	Open	Open	OFF	Empty	Closed	ON	ON	OFF	OFF	ON	ON	21	0 mm	ON	ON	0	OFF	OFF	ON	ON	ON	OFF	OFF	ON	Closed	OFF	ON	OFF	ON	ON	OFF	Medium	Closed
224	Unexpected Shutdown	Dispatch Maintenance Team	Null	What	Null	Null	How	Feedback	Medium	True	ON	16	Medium	Null	Null	08/05/2024 20:54:60	Open	Open	OFF	Empty	Open	OFF	ON	OFF	ON	OFF	ON	15	0 mm	ON	ON	0	OFF	OFF	OFF	OFF	OFF	OFF	ON	OFF	Closed	OFF	ON	OFF	ON	OFF	OFF	Medium	Closed
225	Unusual Activity Detected	Shut Down Affected Components	User Confirmation	What	Null	Null	How	Feedback-Adaptation	High	True	ON	15	Low	Null	True	08/05/2024 20:54:61	Closed	Open	ON	Occupied	Open	OFF	OFF	OFF	OFF	ON	ON	34	10 mm	ON	ON	0	OFF	OFF	OFF	ON	OFF	OFF	OFF	OFF	Closed	OFF	ON	ON	ON	OFF	OFF	Medium	Open
226	Routine Maintenance Alert	Schedule Repair	Rain Detected = True	What	Null	Null	How	Feedback	Low	False	OFF	17	Medium	Null	Null	08/05/2024 20:54:62	Closed	Closed	ON	Empty	Open	ON	OFF	ON	ON	ON	ON	26	40 mm	OFF	ON	0	OFF	OFF	ON	OFF	OFF	ON	OFF	OFF	Closed	OFF	ON	OFF	ON	ON	ON	Medium	Closed
227	Unexpected Shutdown	Send Alert to Admin	Rain Detected = True	What	Null	Null	How	Feedback-Adaptation	Medium	False	ON	25	High	Null	Null	08/05/2024 20:54:63	Open	Open	OFF	Occupied	Closed	OFF	OFF	OFF	OFF	OFF	ON	27	49 mm	OFF	ON	0	OFF	OFF	OFF	OFF	OFF	ON	ON	OFF	Closed	OFF	OFF	OFF	ON	OFF	OFF	Medium	Closed
228	Unauthorized Access Detected	Schedule Repair	User Confirmation	What	Null	Null	How	Feedback-Adaptation	High	False	OFF	28	High	Null	False	08/05/2024 20:54:64	Open	Open	OFF	Occupied	Closed	OFF	ON	OFF	OFF	ON	ON	30	0 mm	ON	ON	0	OFF	OFF	OFF	OFF	OFF	ON	OFF	ON	Closed	ON	OFF	ON	ON	ON	ON	Medium	Open
[truncated: 20 more columns]

## Sheet: Search-scenario
									Part-explanation
	Information					Explanation-event	Explanation-action	Explanation-condition	Part-01	Part-02	Part-03	Part-04	Type	Level-of-attention	Oral-message	Refrigerator	Refrigerator-Quantity-Products	Refrigerator-Stock-Level	Service-Purchase	User-Confirmation	Date-and-time	Main-door	Bedroom-door	Bedroom-Light	State-Bed	Office-Door	Office-Light	TV	Couch	Washer-Machine	Washing-machine-state	System-Weather	Ambient-temperature	Rain-State	Camera-Security	Storage-Cloud-Server-Security	Intruder-Detection	AirConditioner-Cold	AirConditioner-Hot	Oven	Oven-State	Batidor	Washer-Dish	Kettle	Kettle-State	Kitchen-door	Kitchen-Light	Cooking-Plate	Kitchen-air-extractor-fan
					1	Detection of Low Stock	Purchase Request	Null	What	Null	Null	Null	Feedback	High	True	ON	0	Low	Null	Null	08/05/2024 10:54:05	Closed	Closed	OFF	Unemployed	Open	OFF	OFF	OFF	OFF	OFF	ON	35°	0 mm	ON	ON	0	ON	OFF	OFF	OFF	OFF	OFF	OFF	OFF	Closed	OFF	OFF	OFF
					2	Detection of Low Stock	Purchase Request	Null	What	Null	Null	Null	Feedback	Low	True	ON	1	Low	Null	Null	08/05/2024 16:54:05	Closed	Closed	OFF	Unemployed	Open	OFF	OFF	OFF	OFF	OFF	ON	35°	0 mm	ON	ON	0	ON	OFF	OFF	OFF	OFF	OFF	OFF	OFF	Closed	OFF	OFF	OFF
					3	Detection of Low Stock	Purchase Request	Null	What	Null	Null	Null	Feedback	Medium	True	ON	2	Low	Null	Null	08/05/2024 20:54:05	Closed	Closed	OFF	Unemployed	Closed	OFF	OFF	OFF	OFF	OFF	ON	25°	0 mm	ON	ON	0	OFF	OFF	OFF	OFF	OFF	OFF	OFF	OFF	Closed	OFF	OFF	OFF
					4	Detection of Low Stock	Purchase Request	Null	What	Why	Null	Null	Feedback	High	True	ON	0	Low	Null	Null	08/05/2024 10:54:05	Closed	Closed	OFF	Unemployed	Open	OFF	OFF	OFF	OFF	OFF	ON	35°	0 mm	ON	ON	0	ON	OFF	OFF	OFF	OFF	OFF	OFF	OFF	Closed	OFF	OFF	OFF
					5	Detection of Low Stock	Purchase Request	Null	What	Why	Null	Null	Feedback	Low	True	ON	1	Low	Null	Null	08/05/2024 16:54:05	Closed	Closed	OFF	Unemployed	Open	OFF	OFF	OFF	OFF	OFF	ON	35°	0 mm	ON	ON	0	ON	OFF	OFF	OFF	OFF	OFF	OFF	OFF	Closed	OFF	OFF	OFF
					6	Detection of Low Stock	Purchase Request	Null	What	Why	Null	Null	Feedback	Medium	True	ON	2	Low	Null	Null	08/05/2024 20:54:05	Closed	Closed	OFF	Unemployed	Closed	OFF	OFF	OFF	OFF	OFF	ON	25°	0 mm	ON	ON	0	OFF	OFF	OFF	OFF	OFF	OFF	OFF	OFF	Closed	OFF	OFF	OFF
	Example:	154			7	Detection of Low Stock	Purchase Request	Null	What	Null	Null	How	Feedback	High	True	ON	0	Low	Null	Null	08/05/2024 10:54:05	Closed	Closed	OFF	Unemployed	Open	OFF	OFF	OFF	OFF	OFF	ON	35°	0 mm	ON	ON	0	ON	OFF	OFF	OFF	OFF	OFF	OFF	OFF	Closed	OFF	OFF	OFF
	Log:				8	Detection of Low Stock	Purchase Request	Null	What	Null	Null	How	Feedback	Low	True	ON	1	Low	Null	Null	08/05/2024 16:54:05	Closed	Closed	OFF	Unemployed	Open	OFF	OFF	OFF	OFF	OFF	ON	35°	0 mm	ON	ON	0	ON	OFF	OFF	OFF	OFF	OFF	OFF	OFF	Closed	OFF	OFF	OFF
					9	Detection of Low Stock	Purchase Request	Null	What	Null	Null	How	Feedback	Medium	True	ON	2	Low	Null	Null	08/05/2024 20:54:05	Closed	Closed	OFF	Unemployed	Closed	OFF	OFF	OFF	OFF	OFF	ON	25°	0 mm	ON	ON	0	OFF	OFF	OFF	OFF	OFF	OFF	OFF	OFF	Closed	OFF	OFF	OFF
	#VALUE!				10	Detection of Low Stock	Purchase Request	Null	What	Why	Null	How	Feedback	High	True	ON	0	Low	Null	Null	08/05/2024 10:54:05	Closed	Closed	OFF	Unemployed	Open	OFF	OFF	OFF	OFF	OFF	ON	35°	0 mm	ON	ON	0	ON	OFF	OFF	OFF	OFF	OFF	OFF	OFF	Closed	OFF	OFF	OFF
					11	Detection of Low Stock	Purchase Request	Null	What	Why	Null	How	Feedback	Low	True	ON	1	Low	Null	Null	08/05/2024 16:54:05	Closed	Closed	OFF	Unemployed	Open	OFF	OFF	OFF	OFF	OFF	ON	35°	0 mm	ON	ON	0	ON	OFF	OFF	OFF	OFF	OFF	OFF	OFF	Closed	OFF	OFF	OFF
					12	Detection of Low Stock	Purchase Request	Null	What	Why	Null	How	Feedback	Medium	True	ON	2	Low	Null	Null	08/05/2024 20:54:05	Closed	Closed	OFF	Unemployed	Closed	OFF	OFF	OFF	OFF	OFF	ON	25°	0 mm	ON	ON	0	OFF	OFF	OFF	OFF	OFF	OFF	OFF	OFF	Closed	OFF	OFF	OFF
					13	Detection of Low Stock	Purchase Request	Null	What	Null	What if	Null	Feedback	High	True	ON	0	Low	Null	Null	08/05/2024 10:54:05	Closed	Closed	OFF	Unemployed	Open	OFF	OFF	OFF	OFF	OFF	ON	35°	0 mm	ON	ON	0	ON	OFF	OFF	OFF	OFF	OFF	OFF	OFF	Closed	OFF	OFF	OFF
					14	Detection of Low Stock	Purchase Request	Null	What	Null	What if	Null	Feedback	Low	True	ON	1	Low	Null	Null	08/05/2024 16:54:05	Closed	Closed	OFF	Unemployed	Open	OFF	OFF	OFF	OFF	OFF	ON	35°	0 mm	ON	ON	0	ON	OFF	OFF	OFF	OFF	OFF	OFF	OFF	Closed	OFF	OFF	OFF
	Oral-message	:False	11		15	Detection of Low Stock	Purchase Request	Null	What	Null	What if	Null	Feedback	Medium	True	ON	2	Low	Null	Null	08/05/2024 20:54:05	Closed	Closed	OFF	Unemployed	Closed	OFF	OFF	OFF	OFF	OFF	ON	25°	0 mm	ON	ON	0	OFF	OFF	OFF	OFF	OFF	OFF	OFF	OFF	Closed	OFF	OFF	OFF
	Refrigerator	:ON	12		16	Detection of Low Stock	Purchase Request	Null	What	Null	Null	Null	Feedback	High	False	ON	0	Low	Null	Null	08/05/2024 10:54:05	Closed	Closed	OFF	Unemployed	Open	OFF	OFF	OFF	OFF	OFF	ON	35°	0 mm	ON	ON	0	ON	OFF	OFF	OFF	OFF	OFF	OFF	OFF	Closed	OFF	OFF	OFF
	Refrigerator-Quantity-Products	:8	13		17	Detection of Low Stock	Purchase Request	Null	What	Null	Null	Null	Feedback	Low	False	ON	1	Low	Null	Null	08/05/2024 16:54:05	Closed	Closed	OFF	Unemployed	Open	OFF	OFF	OFF	OFF	OFF	ON	35°	0 mm	ON	ON	0	ON	OFF	OFF	OFF	OFF	OFF	OFF	OFF	Closed	OFF	OFF	OFF
	Refrigerator-Stock-Level	:Medium	14		18	Detection of Low Stock	Purchase Request	Null	What	Null	Null	Null	Feedback	Medium	False	ON	2	Low	Null	Null	08/05/2024 20:54:05	Closed	Closed	OFF	Unemployed	Closed	OFF	OFF	OFF	OFF	OFF	ON	25°	0 mm	ON	ON	0	OFF	OFF	OFF	OFF	OFF	OFF	OFF	OFF	Closed	OFF	OFF	OFF
	Service-Purchase	:Null	15		19	Detection of Low Stock	Purchase Request	Null	What	Why	Null	Null	Feedback	High	False	ON	0	Low	Null	Null	08/05/2024 10:54:05	Closed	Closed	OFF	Unemployed	Open	OFF	OFF	OFF	OFF	OFF	ON	35°	0 mm	ON	ON	0	ON	OFF	OFF	OFF	OFF	OFF	OFF	OFF	Closed	OFF	OFF	OFF
	User-Confirmation	:Null	16		20	Detection of Low Stock	Purchase Request	Null	What	Why	Null	Null	Feedback	Low	False	ON	1	Low	Null	Null	08/05/2024 16:54:05	Closed	Closed	OFF	Unemployed	Open	OFF	OFF	OFF	OFF	OFF	ON	35°	0 mm	ON	ON	0	ON	OFF	OFF	OFF	OFF	OFF	OFF	OFF	Closed	OFF	OFF	OFF
	Date-and-time	:08/05/2024 10:54:06	17		21	Detection of Low Stock	Purchase Request	Null	What	Why	Null	Null	Feedback	Medium	False	ON	2	Low	Null	Null	08/05/2024 20:54:05	Closed	Closed	OFF	Unemployed	Closed	OFF	OFF	OFF	OFF	OFF	ON	25°	0 mm	ON	ON	0	OFF	OFF	OFF	OFF	OFF	OFF	OFF	OFF	Closed	OFF	OFF	OFF
	Main-door	:Closed	18		22	Detection of Low Stock	Purchase Request	Null	What	Null	Null	How	Feedback	High	False	ON	0	Low	Null	Null	08/05/2024 10:54:05	Closed	Closed	OFF	Unemployed	Open	OFF	OFF	OFF	OFF	OFF	ON	35°	0 mm	ON	ON	0	ON	OFF	OFF	OFF	OFF	OFF	OFF	OFF	Closed	OFF	OFF	OFF
	Bedroom-door	:Closed	19		23	Detection of Low Stock	Purchase Request	Null	What	Null	Null	How	Feedback	Low	False	ON	1	Low	Null	Null	08/05/2024 16:54:05	Closed	Closed	OFF	Unemployed	Open	OFF	OFF	OFF	OFF	OFF	ON	35°	0 mm	ON	ON	0	ON	OFF	OFF	OFF	OFF	OFF	OFF	OFF	Closed	OFF	OFF	OFF
	Bedroom-Light	:OFF	20		24	Detection of Low Stock	Purchase Request	Null	What	Null	Null	How	Feedback	Medium	False	ON	2	Low	Null	Null	08/05/2024 20:54:05	Closed	Closed	OFF	Unemployed	Closed	OFF	OFF	OFF	OFF	OFF	ON	25°	0 mm	ON	ON	0	OFF	OFF	OFF	OFF	OFF	OFF	OFF	OFF	Closed	OFF	OFF	OFF
	State-Bed	:Unemployed	21		25	Detection of Low Stock	Purchase Request	Null	What	Why	Null	How	Feedback	High	False	ON	0	Low	Null	Null	08/05/2024 10:54:05	Closed	Closed	OFF	Unemployed	Open	OFF	OFF	OFF	OFF	OFF	ON	35°	0 mm	ON	ON	0	ON	OFF	OFF	OFF	OFF	OFF	OFF	OFF	Closed	OFF	OFF	OFF
	Office-Door	:Open	22		26	Detection of Low Stock	Purchase Request	Null	What	Why	Null	How	Feedback	Low	False	ON	1	Low	Null	Null	08/05/2024 16:54:05	Closed	Closed	OFF	Unemployed	Open	OFF	OFF	OFF	OFF	OFF	ON	35°	0 mm	ON	ON	0	ON	OFF	OFF	OFF	OFF	OFF	OFF	OFF	Closed	OFF	OFF	OFF
	Office-Light	:OFF	23		27	Detection of Low Stock	Purchase Request	Null	What	Why	Null	How	Feedback	Medium	False	ON	2	Low	Null	Null	08/05/2024 20:54:05	Closed	Closed	OFF	Unemployed	Closed	OFF	OFF	OFF	OFF	OFF	ON	25°	0 mm	ON	ON	0	OFF	OFF	OFF	OFF	OFF	OFF	OFF	OFF	Closed	OFF	OFF	OFF
	TV	:OFF	24		28	Detection of Low Stock	Purchase Request	Null	What	Null	What if	Null	Feedback	High	False	ON	0	Low	Null	Null	08/05/2024 10:54:05	Closed	Closed	OFF	Unemployed	Open	OFF	OFF	OFF	OFF	OFF	ON	35°	0 mm	ON	ON	0	ON	OFF	OFF	OFF	OFF	OFF	OFF	OFF	Closed	OFF	OFF	OFF
	Couch	:OFF	25		29	Detection of Low Stock	Purchase Request	Null	What	Null	What if	Null	Feedback	Low	False	ON	1	Low	Null	Null	08/05/2024 16:54:05	Closed	Closed	OFF	Unemployed	Open	OFF	OFF	OFF	OFF	OFF	ON	35°	0 mm	ON	ON	0	ON	OFF	OFF	OFF	OFF	OFF	OFF	OFF	Closed	OFF	OFF	OFF
	Washer-Machine	:OFF	26		30	Detection of Low Stock	Purchase Request	Null	What	Null	What if	Null	Feedback	Medium	False	ON	2	Low	Null	Null	08/05/2024 20:54:05	Closed	Closed	OFF	Unemployed	Closed	OFF	OFF	OFF	OFF	OFF	ON	25°	0 mm	ON	ON	0	OFF	OFF	OFF	OFF	OFF	OFF	OFF	OFF	Closed	OFF	OFF	OFF
	Washing-machine-state	:OFF	27		31	Auxiliary Supermarket Purchase	Purchase Request	Purchase Service Not Responding and Quantity of Products = 0	What	Null	Null	Null	Feedback-Adaptation	High	True	ON	0	Low	Null	Null	08/05/2024 10:54:05	Closed	Closed	OFF	Unemployed	Open	OFF	OFF	OFF	OFF	OFF	ON	35°	0 mm	ON	ON	0	ON	OFF	OFF	OFF	OFF	OFF	OFF	OFF	Closed	OFF	OFF	OFF
	System-Weather	:ON	28		32	Auxiliary Supermarket Purchase	Purchase Request	Purchase Service Not Responding and Quantity of Products = 0	What	Null	Null	Null	Feedback-Adaptation	Low	True	ON	0	Low	Null	Null	08/05/2024 16:54:05	Closed	Closed	OFF	Unemployed	Open	OFF	OFF	OFF	OFF	OFF	ON	35°	0 mm	ON	ON	0	ON	OFF	OFF	OFF	OFF	OFF	OFF	OFF	Closed	OFF	OFF	OFF
	Ambient-temperature	:35°	29		33	Auxiliary Supermarket Purchase	Purchase Request	Purchase Service Not Responding and Quantity of Products = 0	What	Null	Null	Null	Feedback-Adaptation	Medium	True	ON	0	Low	Null	Null	08/05/2024 20:54:05	Closed	Closed	OFF	Unemployed	Closed	OFF	OFF	OFF	OFF	OFF	ON	25°	0 mm	ON	ON	0	OFF	OFF	OFF	OFF	OFF	OFF	OFF	OFF	Closed	OFF	OFF	OFF
	Rain-State	:3 mm	30		34	Auxiliary Supermarket Purchase	Purchase Request	Purchase Service Not Responding and Quantity of Products = 0	What	Why	Null	Null	Feedback-Adaptation	High	True	ON	0	Low	Null	Null	08/05/2024 10:54:05	Closed	Closed	OFF	Unemployed	Open	OFF	OFF	OFF	OFF	OFF	ON	35°	0 mm	ON	ON	0	ON	OFF	OFF	OFF	OFF	OFF	OFF	OFF	Closed	OFF	OFF	OFF
	Camera-Security	:ON	31		35	Auxiliary Supermarket Purchase	Purchase Request	Purchase Service Not Responding and Quantity of Products = 0	What	Why	Null	Null	Feedback-Adaptation	Low	True	ON	0	Low	Null	Null	08/05/2024 16:54:05	Closed	Closed	OFF	Unemployed	Open	OFF	OFF	OFF	OFF	OFF	ON	35°	0 mm	ON	ON	0	ON	OFF	OFF	OFF	OFF	OFF	OFF	OFF	Closed	OFF	OFF	OFF
	Storage-Cloud-Server-Security	:ON	32		36	Auxiliary Supermarket Purchase	Purchase Request	Purchase Service Not Responding and Quantity of Products = 0	What	Why	Null	Null	Feedback-Adaptation	Medium	True	ON	0	Low	Null	Null	08/05/2024 20:54:05	Closed	Closed	OFF	Unemployed	Closed	OFF	OFF	OFF	OFF	OFF	ON	25°	0 mm	ON	ON	0	OFF	OFF	OFF	OFF	OFF	OFF	OFF	OFF	Closed	OFF	OFF	OFF
	Intruder-Detection	:0	33		37	Auxiliary Supermarket Purchase	Purchase Request	Purchase Service Not Responding and Quantity of Products = 0	What	Null	Null	How	Feedback-Adaptation	High	True	ON	0	Low	Null	Null	08/05/2024 10:54:05	Closed	Closed	OFF	Unemployed	Open	OFF	OFF	OFF	OFF	OFF	ON	35°	0 mm	ON	ON	0	ON	OFF	OFF	OFF	OFF	OFF	OFF	OFF	Closed	OFF	OFF	OFF
	AirConditioner-Cold	:ON	34		38	Auxiliary Supermarket Purchase	Purchase Request	Purchase Service Not Responding and Quantity of Products = 0	What	Null	Null	How	Feedback-Adaptation	Low	True	ON	0	Low	Null	Null	08/05/2024 16:54:05	Closed	Closed	OFF	Unemployed	Open	OFF	OFF	OFF	OFF	OFF	ON	35°	0 mm	ON	ON	0	ON	OFF	OFF	OFF	OFF	OFF	OFF	OFF	Closed	OFF	OFF	OFF
	AirConditioner-Hot	:OFF	35		39	Auxiliary Supermarket Purchase	Purchase Request	Purchase Service Not Responding and Quantity of Products = 0	What	Null	Null	How	Feedback-Adaptation	Medium	True	ON	0	Low	Null	Null	08/05/2024 20:54:05	Closed	Closed	OFF	Unemployed	Closed	OFF	OFF	OFF	OFF	OFF	ON	25°	0 mm	ON	ON	0	OFF	OFF	OFF	OFF	OFF	OFF	OFF	OFF	Closed	OFF	OFF	OFF
	Oven	:OFF	36		40	Auxiliary Supermarket Purchase	Purchase Request	Purchase Service Not Responding and Quantity of Products = 0	What	Why	Null	How	Feedback-Adaptation	High	True	ON	0	Low	No-response	Null	08/05/2024 10:54:05	Closed	Closed	OFF	Unemployed	Open	OFF	OFF	OFF	OFF	OFF	ON	35°	0 mm	ON	ON	0	ON	OFF	OFF	OFF	OFF	OFF	OFF	OFF	Closed	OFF	OFF	OFF
	Oven-State	:OFF	37		41	Auxiliary Supermarket Purchase	Purchase Request	Purchase Service Not Responding and Quantity of Products = 0	What	Why	Null	How	Feedback-Adaptation	Low	True	ON	0	Low	No-response	Null	08/05/2024 16:54:05	Closed	Closed	OFF	Unemployed	Open	OFF	OFF	OFF	OFF	OFF	ON	35°	0 mm	ON	ON	0	ON	OFF	OFF	OFF	OFF	OFF	OFF	OFF	Closed	OFF	OFF	OFF
	Batidor	:OFF	38		42	Auxiliary Supermarket Purchase	Purchase Request	Purchase Service Not Responding and Quantity of Products = 0	What	Why	Null	How	Feedback-Adaptation	Medium	True	ON	0	Low	No-response	Null	08/05/2024 20:54:05	Closed	Closed	OFF	Unemployed	Closed	OFF	OFF	OFF	OFF	OFF	ON	25°	0 mm	ON	ON	0	OFF	OFF	OFF	OFF	OFF	OFF	OFF	OFF	Closed	OFF	OFF	OFF
	Washer-Dish	:OFF	39		43	Auxiliary Supermarket Purchase	Purchase Request	Purchase Service Not Responding and Quantity of Products = 0	What	Null	What if	Null	Feedback-Adaptation	High	True	ON	0	Low	No-response	Null	08/05/2024 10:54:05	Closed	Closed	OFF	Unemployed	Open	OFF	OFF	OFF	OFF	OFF	ON	35°	0 mm	ON	ON	0	ON	OFF	OFF	OFF	OFF	OFF	OFF	OFF	Closed	OFF	OFF	OFF
	Kettle	:OFF	40		44	Auxiliary Supermarket Purchase	Purchase Request	Purchase Service Not Responding and Quantity of Products = 0	What	Null	What if	Null	Feedback-Adaptation	Low	True	ON	0	Low	No-response	Null	08/05/2024 16:54:05	Closed	Closed	OFF	Unemployed	Open	OFF	OFF	OFF	OFF	OFF	ON	35°	0 mm	ON	ON	0	ON	OFF	OFF	OFF	OFF	OFF	OFF	OFF	Closed	OFF	OFF	OFF
	Kettle-State	:OFF	41		45	Auxiliary Supermarket Purchase	Purchase Request	Purchase Service Not Responding and Quantity of Products = 0	What	Null	What if	Null	Feedback-Adaptation	Medium	True	ON	0	Low	No-response	Null	08/05/2024 20:54:05	Closed	Closed	OFF	Unemployed	Closed	OFF	OFF	OFF	OFF	OFF	ON	25°	0 mm	ON	ON	0	OFF	OFF	OFF	OFF	OFF	OFF	OFF	OFF	Closed	OFF	OFF	OFF
	Kitchen-door	:Closed	42		46	Auxiliary Supermarket Purchase	Purchase Request	Purchase Service Not Responding and Quantity of Products = 0	What	Null	Null	Null	Feedback-Adaptation	High	False	ON	0	Low	Null	Null	08/05/2024 10:54:05	Closed	Closed	OFF	Unemployed	Open	OFF	OFF	OFF	OFF	OFF	ON	35°	0 mm	ON	ON	0	ON	OFF	OFF	OFF	OFF	OFF	OFF	OFF	Closed	OFF	OFF	OFF
	Kitchen-Light	:OFF	43		47	Auxiliary Supermarket Purchase	Purchase Request	Purchase Service Not Responding and Quantity of Products = 0	What	Null	Null	Null	Feedback-Adaptation	Low	False	ON	0	Low	Null	Null	08/05/2024 16:54:05	Closed	Closed	OFF	Unemployed	Open	OFF	OFF	OFF	OFF	OFF	ON	35°	0 mm	ON	ON	0	ON	OFF	OFF	OFF	OFF	OFF	OFF	OFF	Closed	OFF	OFF	OFF
	Cooking-Plate	:OFF	44		48	Auxiliary Supermarket Purchase	Purchase Request	Purchase Service Not Responding and Quantity of Products = 0	What	Null	Null	Null	Feedback-Adaptation	Medium	False	ON	0	Low	Null	Null	08/05/2024 20:54:05	Closed	Closed	OFF	Unemployed	Closed	OFF	OFF	OFF	OFF	OFF	ON	25°	0 mm	ON	ON	0	OFF	OFF	OFF	OFF	OFF	OFF	OFF	OFF	Closed	OFF	OFF	OFF
	Kitchen-air-extractor-fan	:OFF	45		49	Auxiliary Supermarket Purchase	Purchase Request	Purchase Service Not Responding and Quantity of Products = 0	What	Why	Null	Null	Feedback-Adaptation	High	False	ON	0	Low	Null	Null	08/05/2024 10:54:05	Closed	Closed	OFF	Unemployed	Open	OFF	OFF	OFF	OFF	OFF	ON	35°	0 mm	ON	ON	0	ON	OFF	OFF	OFF	OFF	OFF	OFF	OFF	Closed	OFF	OFF	OFF
	Kitchen-air-extractor-fan-State	:OFF	46		50	Auxiliary Supermarket Purchase	Purchase Request	Purchase Service Not Responding and Quantity of Products = 0	What	Why	Null	Null	Feedback-Adaptation	Low	False	ON	0	Low	Null	Null	08/05/2024 16:54:05	Closed	Closed	OFF	Unemployed	Open	OFF	OFF	OFF	OFF	OFF	ON	35°	0 mm	ON	ON	0	ON	OFF	OFF	OFF	OFF	OFF	OFF	OFF	Closed	OFF	OFF	OFF
	Microwave	:OFF	47		51	Auxiliary Supermarket Purchase	Purchase Request	Purchase Service Not Responding and Quantity of Products = 0	What	Why	Null	Null	Feedback-Adaptation	Medium	False	ON	0	Low	Null	Null	08/05/2024 20:54:05	Closed	Closed	OFF	Unemployed	Closed	OFF	OFF	OFF	OFF	OFF	ON	25°	0 mm	ON	ON	0	OFF	OFF	OFF	OFF	OFF	OFF	OFF	OFF	Closed	OFF	OFF	OFF
	Microwave-State	:OFF	48		52	Auxiliary Supermarket Purchase	Purchase Request	Purchase Service Not Responding and Quantity of Products = 0	What	Null	Null	How	Feedback-Adaptation	High	False	ON	0	Low	Null	Null	08/05/2024 10:54:05	Closed	Closed	OFF	Unemployed	Open	OFF	OFF	OFF	OFF	OFF	ON	35°	0 mm	ON	ON	0	ON	OFF	OFF	OFF	OFF	OFF	OFF	OFF	Closed	OFF	OFF	OFF
	Tash	:Medium	49		53	Auxiliary Supermarket Purchase	Purchase Request	Purchase Service Not Responding and Quantity of Products = 0	What	Null	Null	How	Feedback-Adaptation	Low	False	ON	0	Low	Null	Null	08/05/2024 16:54:05	Closed	Closed	OFF	Unemployed	Open	OFF	OFF	OFF	OFF	OFF	ON	35°	0 mm	ON	ON	0	ON	OFF	OFF	OFF	OFF	OFF	OFF	OFF	Closed	OFF	OFF	OFF
	Bathroom-Light	:OFF	50		54	Auxiliary Supermarket Purchase	Purchase Request	Purchase Service Not Responding and Quantity of Products = 0	What	Null	Null	How	Feedback-Adaptation	Medium	False	ON	0	Low	Null	Null	08/05/2024 20:54:05	Closed	Closed	OFF	Unemployed	Closed	OFF	OFF	OFF	OFF	OFF	ON	25°	0 mm	ON	ON	0	OFF	OFF	OFF	OFF	OFF	OFF	OFF	OFF	Closed	OFF	OFF	OFF
	BathroomDoor-Lock	:Closed	51		55	Auxiliary Supermarket Purchase	Purchase Request	Purchase Service Not Responding and Quantity of Products = 0	What	Why	Null	How	Feedback-Adaptation	High	False	ON	0	Low	No-response	Null	08/05/2024 10:54:05	Closed	Closed	OFF	Unemployed	Open	OFF	OFF	OFF	OFF	OFF	ON	35°	0 mm	ON	ON	0	ON	OFF	OFF	OFF	OFF	OFF	OFF	OFF	Closed	OFF	OFF	OFF
	Bathroom-Door	:Closed	52		56	Auxiliary Supermarket Purchase	Purchase Request	Purchase Service Not Responding and Quantity of Products = 0	What	Why	Null	How	Feedback-Adaptation	Low	False	ON	0	Low	No-response	Null	08/05/2024 16:54:05	Closed	Closed	OFF	Unemployed	Open	OFF	OFF	OFF	OFF	OFF	ON	35°	0 mm	ON	ON	0	ON	OFF	OFF	OFF	OFF	OFF	OFF	OFF	Closed	OFF	OFF	OFF
	Windows-kitchen	:Closed	53		57	Auxiliary Supermarket Purchase	Purchase Request	Purchase Service Not Responding and Quantity of Products = 0	What	Why	Null	How	Feedback-Adaptation	Medium	False	ON	0	Low	No-response	Null	08/05/2024 20:54:05	Closed	Closed	OFF	Unemployed	Closed	OFF	OFF	OFF	OFF	OFF	ON	25°	0 mm	ON	ON	0	OFF	OFF	OFF	OFF	OFF	OFF	OFF	OFF	Closed	OFF	OFF	OFF
	Windows-main-room	:Closed	54		58	Auxiliary Supermarket Purchase	Purchase Request	Purchase Service Not Responding and Quantity of Products = 0	What	Null	What if	Null	Feedback-Adaptation	High	False	ON	0	Low	No-response	Null	08/05/2024 10:54:05	Closed	Closed	OFF	Unemployed	Open	OFF	OFF	OFF	OFF	OFF	ON	35°	0 mm	ON	ON	0	ON	OFF	OFF	OFF	OFF	OFF	OFF	OFF	Closed	OFF	OFF	OFF
	Windows-office	:Closed	55		59	Auxiliary Supermarket Purchase	Purchase Request	Purchase Service Not Responding and Quantity of Products = 0	What	Null	What if	Null	Feedback-Adaptation	Low	False	ON	0	Low	No-response	Null	08/05/2024 16:54:05	Closed	Closed	OFF	Unemployed	Open	OFF	OFF	OFF	OFF	OFF	ON	35°	0 mm	ON	ON	0	ON	OFF	OFF	OFF	OFF	OFF	OFF	OFF	Closed	OFF	OFF	OFF
	Users-Garden	:0	56		60	Auxiliary Supermarket Purchase	Purchase Request	Purchase Service Not Responding and Quantity of Products = 0	What	Null	What if	Null	Feedback-Adaptation	Medium	False	ON	0	Low	No-response	Null	08/05/2024 20:54:05	Closed	Closed	OFF	Unemployed	Closed	OFF	OFF	OFF	OFF	OFF	ON	25°	0 mm	ON	ON	0	OFF	OFF	OFF	OFF	OFF	OFF	OFF	OFF	Closed	OFF	OFF	OFF
	Irrigation-System	:ON	57		61	Supermarket Purchase	Purchase Request	User Confirmation	What	Null	Null	Null	Feedforward	High	True	ON	0	Low	Null	Null	08/05/2024 10:54:05	Closed	Closed	OFF	Unemployed	Open	OFF	OFF	OFF	OFF	OFF	ON	35°	0 mm	ON	ON	0	ON	OFF	OFF	OFF	OFF	OFF	OFF	OFF	Closed	OFF	OFF	OFF
	Pressure-Sprinkler-01	:55 PSI	58		62	Supermarket Purchase	Purchase Request	User Confirmation	What	Null	Null	Null	Feedforward	Low	True	ON	0	Low	Null	Null	08/05/2024 16:54:05	Closed	Closed	OFF	Unemployed	Open	OFF	OFF	OFF	OFF	OFF	ON	35°	0 mm	ON	ON	0	ON	OFF	OFF	OFF	OFF	OFF	OFF	OFF	Closed	OFF	OFF	OFF
	Pressure-Sprinkler-02	:41 PSI	59		63	Supermarket Purchase	Purchase Request	User Confirmation	What	Null	Null	Null	Feedforward	Medium	True	ON	0	Low	Null	Null	08/05/2024 20:54:05	Closed	Closed	OFF	Unemployed	Closed	OFF	OFF	OFF	OFF	OFF	ON	25°	0 mm	ON	ON	0	OFF	OFF	OFF	OFF	OFF	OFF	OFF	OFF	Closed	OFF	OFF	OFF
	Air-Quality-Meter	:ON	60		64	Supermarket Purchase	Purchase Request	User Confirmation	What	Why	Null	Null	Feedforward	High	True	ON	0	Low	Null	Null	08/05/2024 10:54:05	Closed	Closed	OFF	Unemployed	Open	OFF	OFF	OFF	OFF	OFF	ON	35°	0 mm	ON	ON	0	ON	OFF	OFF	OFF	OFF	OFF	OFF	OFF	Closed	OFF	OFF	OFF
	Level-Quality-Air	:80	61		65	Supermarket Purchase	Purchase Request	User Confirmation	What	Why	Null	Null	Feedforward	Low	True	ON	0	Low	Null	Null	08/05/2024 16:54:05	Closed	Closed	OFF	Unemployed	Open	OFF	OFF	OFF	OFF	OFF	ON	35°	0 mm	ON	ON	0	ON	OFF	OFF	OFF	OFF	OFF	OFF	OFF	Closed	OFF	OFF	OFF
	Air-Sanitation-System	:OFF	62		66	Supermarket Purchase	Purchase Request	User Confirmation	What	Why	Null	Null	Feedforward	Medium	True	ON	0	Low	Null	Null	08/05/2024 20:54:05	Closed	Closed	OFF	Unemployed	Closed	OFF	OFF	OFF	OFF	OFF	ON	25°	0 mm	ON	ON	0	OFF	OFF	OFF	OFF	OFF	OFF	OFF	OFF	Closed	OFF	OFF	OFF
	Users-home	:1	63		67	Supermarket Purchase	Purchase Request	User Confirmation	What	Null	Null	How	Feedforward	High	True	ON	0	Low	Null	Null	08/05/2024 10:54:05	Closed	Closed	OFF	Unemployed	Open	OFF	OFF	OFF	OFF	OFF	ON	35°	0 mm	ON	ON	0	ON	OFF	OFF	OFF	OFF	OFF	OFF	OFF	Closed	OFF	OFF	OFF
	User-Rest	:No	64		68	Supermarket Purchase	Purchase Request	User Confirmation	What	Null	Null	How	Feedforward	Low	True	ON	0	Low	Null	Null	08/05/2024 16:54:05	Closed	Closed	OFF	Unemployed	Open	OFF	OFF	OFF	OFF	OFF	ON	35°	0 mm	ON	ON	0	ON	OFF	OFF	OFF	OFF	OFF	OFF	OFF	Closed	OFF	OFF	OFF
	Age-user	:55	65		69	Supermarket Purchase	Purchase Request	User Confirmation	What	Null	Null	How	Feedforward	Medium	True	ON	0	Low	Null	Null	08/05/2024 20:54:05	Closed	Closed	OFF	Unemployed	Closed	OFF	OFF	OFF	OFF	OFF	ON	25°	0 mm	ON	ON	0	OFF	OFF	OFF	OFF	OFF	OFF	OFF	OFF	Closed	OFF	OFF	OFF
	Level-experience-devices	:Produce an explanation containing only the 'What' and no other arguments, for the request 'Anomalous Pressure ' triggered by a 'Manual Adjustment ' and requires to fulfill 'Sprinkler Pressure > 50 PSI' of type 'Feedforward' with an attention level 'High' ; with the following information:	67		70	Supermarket Purchase	Purchase Request	User Confirmation	What	Why	Null	How	Feedforward	High	True	ON	0	Low	Null	Null	08/05/2024 10:54:05	Closed	Closed	OFF	Unemployed	Open	OFF	OFF	OFF	OFF	OFF	ON	35°	0 mm	ON	ON	0	ON	OFF	OFF	OFF	OFF	OFF	OFF	OFF	Closed	OFF	OFF	OFF
					71	Supermarket Purchase	Purchase Request	User Confirmation	What	Why	Null	How	Feedforward	Low	True	ON	0	Low	Null	Null	08/05/2024 16:54:05	Closed	Closed	OFF	Unemployed	Open	OFF	OFF	OFF	OFF	OFF	ON	35°	0 mm	ON	ON	0	ON	OFF	OFF	OFF	OFF	OFF	OFF	OFF	Closed	OFF	OFF	OFF
					72	Supermarket Purchase	Purchase Request	User Confirmation	What	Why	Null	How	Feedforward	Medium	True	ON	0	Low	Null	Null	08/05/2024 20:54:05	Closed	Closed	OFF	Unemployed	Closed	OFF	OFF	OFF	OFF	OFF	ON	25°	0 mm	ON	ON	0	OFF	OFF	OFF	OFF	OFF	OFF	OFF	OFF	Closed	OFF	OFF	OFF
					73	Supermarket Purchase	Purchase Request	User Confirmation	What	Null	What if	Null	Feedforward	High	True	ON	0	Low	Null	Null	08/05/2024 10:54:05	Closed	Closed	OFF	Unemployed	Open	OFF	OFF	OFF	OFF	OFF	ON	35°	0 mm	ON	ON	0	ON	OFF	OFF	OFF	OFF	OFF	OFF	OFF	Closed	OFF	OFF	OFF
					74	Supermarket Purchase	Purchase Request	User Confirmation	What	Null	What if	Null	Feedforward	Low	True	ON	0	Low	Null	Null	08/05/2024 16:54:05	Closed	Closed	OFF	Unemployed	Open	OFF	OFF	OFF	OFF	OFF	ON	35°	0 mm	ON	ON	0	ON	OFF	OFF	OFF	OFF	OFF	OFF	OFF	Closed	OFF	OFF	OFF
					75	Supermarket Purchase	Purchase Request	User Confirmation	What	Null	What if	Null	Feedforward	Medium	True	ON	0	Low	Null	Null	08/05/2024 20:54:05	Closed	Closed	OFF	Unemployed	Closed	OFF	OFF	OFF	OFF	OFF	ON	25°	0 mm	ON	ON	0	OFF	OFF	OFF	OFF	OFF	OFF	OFF	OFF	Closed	OFF	OFF	OFF
					76	Supermarket Purchase	Purchase Request	User Confirmation	What	Null	Null	Null	Feedforward	High	False	ON	0	Low	Null	Null	08/05/2024 10:54:05	Closed	Closed	OFF	Unemployed	Open	OFF	OFF	OFF	OFF	OFF	ON	35°	0 mm	ON	ON	0	ON	OFF	OFF	OFF	OFF	OFF	OFF	OFF	Closed	OFF	OFF	OFF
					77	Supermarket Purchase	Purchase Request	User Confirmation	What	Null	Null	Null	Feedforward	Low	False	ON	0	Low	Null	Null	08/05/2024 16:54:05	Closed	Closed	OFF	Unemployed	Open	OFF	OFF	OFF	OFF	OFF	ON	35°	0 mm	ON	ON	0	ON	OFF	OFF	OFF	OFF	OFF	OFF	OFF	Closed	OFF	OFF	OFF
					78	Supermarket Purchase	Purchase Request	User Confirmation	What	Null	Null	Null	Feedforward	Medium	False	ON	0	Low	Null	Null	08/05/2024 20:54:05	Closed	Closed	OFF	Unemployed	Closed	OFF	OFF	OFF	OFF	OFF	ON	25°	0 mm	ON	ON	0	OFF	OFF	OFF	OFF	OFF	OFF	OFF	OFF	Closed	OFF	OFF	OFF
					79	Supermarket Purchase	Purchase Request	User Confirmation	What	Why	Null	Null	Feedforward	High	False	ON	0	Low	Null	Null	08/05/2024 10:54:05	Closed	Closed	OFF	Unemployed	Open	OFF	OFF	OFF	OFF	OFF	ON	35°	0 mm	ON	ON	0	ON	OFF	OFF	OFF	OFF	OFF	OFF	OFF	Closed	OFF	OFF	OFF
					80	Supermarket Purchase	Purchase Request	User Confirmation	What	Why	Null	Null	Feedforward	Low	False	ON	0	Low	Null	Null	08/05/2024 16:54:05	Closed	Closed	OFF	Unemployed	Open	OFF	OFF	OFF	OFF	OFF	ON	35°	0 mm	ON	ON	0	ON	OFF	OFF	OFF	OFF	OFF	OFF	OFF	Closed	OFF	OFF	OFF
					81	Supermarket Purchase	Purchase Request	User Confirmation	What	Why	Null	Null	Feedforward	Medium	False	ON	0	Low	Null	Null	08/05/2024 20:54:05	Closed	Closed	OFF	Unemployed	Closed	OFF	OFF	OFF	OFF	OFF	ON	25°	0 mm	ON	ON	0	OFF	OFF	OFF	OFF	OFF	OFF	OFF	OFF	Closed	OFF	OFF	OFF
					82	Supermarket Purchase	Purchase Request	User Confirmation	What	Null	Null	How	Feedforward	High	False	ON	0	Low	Null	Null	08/05/2024 10:54:05	Closed	Closed	OFF	Unemployed	Open	OFF	OFF	OFF	OFF	OFF	ON	35°	0 mm	ON	ON	0	ON	OFF	OFF	OFF	OFF	OFF	OFF	OFF	Closed	OFF	OFF	OFF
					83	Supermarket Purchase	Purchase Request	User Confirmation	What	Null	Null	How	Feedforward	Low	False	ON	0	Low	Null	Null	08/05/2024 16:54:05	Closed	Closed	OFF	Unemployed	Open	OFF	OFF	OFF	OFF	OFF	ON	35°	0 mm	ON	ON	0	ON	OFF	OFF	OFF	OFF	OFF	OFF	OFF	Closed	OFF	OFF	OFF
					84	Supermarket Purchase	Purchase Request	User Confirmation	What	Null	Null	How	Feedforward	Medium	False	ON	0	Low	Null	Null	08/05/2024 20:54:05	Closed	Closed	OFF	Unemployed	Closed	OFF	OFF	OFF	OFF	OFF	ON	25°	0 mm	ON	ON	0	OFF	OFF	OFF	OFF	OFF	OFF	OFF	OFF	Closed	OFF	OFF	OFF
					85	Supermarket Purchase	Purchase Request	User Confirmation	What	Why	Null	How	Feedforward	High	False	ON	0	Low	Null	Null	08/05/2024 10:54:05	Closed	Closed	OFF	Unemployed	Open	OFF	OFF	OFF	OFF	OFF	ON	35°	0 mm	ON	ON	0	ON	OFF	OFF	OFF	OFF	OFF	OFF	OFF	Closed	OFF	OFF	OFF
					86	Supermarket Purchase	Purchase Request	User Confirmation	What	Why	Null	How	Feedforward	Low	False	ON	0	Low	Null	Null	08/05/2024 16:54:05	Closed	Closed	OFF	Unemployed	Open	OFF	OFF	OFF	OFF	OFF	ON	35°	0 mm	ON	ON	0	ON	OFF	OFF	OFF	OFF	OFF	OFF	OFF	Closed	OFF	OFF	OFF
					87	Supermarket Purchase	Purchase Request	User Confirmation	What	Why	Null	How	Feedforward	Medium	False	ON	0	Low	Null	Null	08/05/2024 20:54:05	Closed	Closed	OFF	Unemployed	Closed	OFF	OFF	OFF	OFF	OFF	ON	25°	0 mm	ON	ON	0	OFF	OFF	OFF	OFF	OFF	OFF	OFF	OFF	Closed	OFF	OFF	OFF
					88	Supermarket Purchase	Purchase Request	User Confirmation	What	Null	What if	Null	Feedforward	High	False	ON	0	Low	Null	Null	08/05/2024 10:54:05	Closed	Closed	OFF	Unemployed	Open	OFF	OFF	OFF	OFF	OFF	ON	35°	0 mm	ON	ON	0	ON	OFF	OFF	OFF	OFF	OFF	OFF	OFF	Closed	OFF	OFF	OFF
					89	Supermarket Purchase	Purchase Request	User Confirmation	What	Null	What if	Null	Feedforward	Low	False	ON	0	Low	Null	Null	08/05/2024 16:54:05	Closed	Closed	OFF	Unemployed	Open	OFF	OFF	OFF	OFF	OFF	ON	35°	0 mm	ON	ON	0	ON	OFF	OFF	OFF	OFF	OFF	OFF	OFF	Closed	OFF	OFF	OFF
					90	Supermarket Purchase	Purchase Request	User Confirmation	What	Null	What if	Null	Feedforward	Medium	False	ON	0	Low	Null	Null	08/05/2024 20:54:05	Closed	Closed	OFF	Unemployed	Closed	OFF	OFF	OFF	OFF	OFF	ON	25°	0 mm	ON	ON	0	OFF	OFF	OFF	OFF	OFF	OFF	OFF	OFF	Closed	OFF	OFF	OFF
					91	Watering Time	Activate Sprinklers	No users in the garden	What	Null	Null	Null	Feedback	High	True	ON	5	Medium	Null	Null	08/05/2024 10:54:05	Closed	Closed	OFF	Unemployed	Open	OFF	OFF	OFF	OFF	OFF	ON	35°	0 mm	ON	ON	0	ON	OFF	OFF	OFF	OFF	OFF	OFF	OFF	Closed	OFF	OFF	OFF
					92	Watering Time	Activate Sprinklers	No users in the garden	What	Null	Null	Null	Feedback	Low	True	ON	6	Medium	Null	Null	08/05/2024 16:54:05	Closed	Closed	OFF	Unemployed	Open	OFF	OFF	OFF	OFF	OFF	ON	35°	0 mm	ON	ON	0	ON	OFF	OFF	OFF	OFF	OFF	OFF	OFF	Closed	OFF	OFF	OFF
					93	Watering Time	Activate Sprinklers	No users in the garden	What	Null	Null	Null	Feedback	Medium	True	ON	7	Medium	Null	Null	08/05/2024 18:54:05	Closed	Closed	OFF	Unemployed	Closed	OFF	OFF	OFF	OFF	OFF	ON	25°	0 mm	ON	ON	0	OFF	OFF	OFF	OFF	OFF	OFF	OFF	OFF	Closed	OFF	OFF	OFF
					94	Watering Time	Suspend Sprinklers	Rain Detected = True	What	Null	Null	Null	Feedback-Adaptation	High	True	ON	8	Medium	Null	Null	08/05/2024 10:54:06	Closed	Closed	OFF	Unemployed	Open	OFF	OFF	OFF	OFF	OFF	ON	35°	3 mm	ON	ON	0	ON	OFF	OFF	OFF	OFF	OFF	OFF	OFF	Closed	OFF	OFF	OFF
					95	Watering Time	Suspend Sprinklers	Rain Detected = True	What	Null	Null	Null	Feedback-Adaptation	Low	True	ON	9	Medium	Null	Null	08/05/2024 16:54:06	Closed	Closed	OFF	Unemployed	Open	OFF	OFF	OFF	OFF	OFF	ON	35°	2 mm	ON	ON	0	ON	OFF	OFF	OFF	OFF	OFF	OFF	OFF	Closed	OFF	OFF	OFF
					96	Watering Time	Suspend Sprinklers	Rain Detected = True	What	Null	Null	Null	Feedback-Adaptation	Medium	True	ON	10	Medium	Null	Null	08/05/2024 18:54:06	Closed	Closed	OFF	Unemployed	Closed	OFF	OFF	OFF	OFF	OFF	ON	25°	3 mm	ON	ON	0	OFF	OFF	OFF	OFF	OFF	OFF	OFF	OFF	Closed	OFF	OFF	OFF
					97	Anomalous Pressure	Manual Adjustment	Sprinkler Pressure > 50 PSI	What	Null	Null	Null	Feedforward	High	True	ON	8	Medium	Null	Null	08/05/2024 10:54:06	Closed	Closed	OFF	Unemployed	Open	OFF	OFF	OFF	OFF	OFF	ON	35°	3 mm	ON	ON	0	ON	OFF	OFF	OFF	OFF	OFF	OFF	OFF	Closed	OFF	OFF	OFF
					98	Anomalous Pressure	Manual Adjustment	Sprinkler Pressure > 50 PSI	What	Null	Null	Null	Feedforward	Low	True	ON	9	Medium	Null	Null	08/05/2024 16:54:06	Closed	Closed	OFF	Unemployed	Open	OFF	OFF	OFF	OFF	OFF	ON	35°	2 mm	ON	ON	0	ON	OFF	OFF	OFF	OFF	OFF	OFF	OFF	Closed	OFF	OFF	OFF
					99	Anomalous Pressure	Manual Adjustment	Sprinkler Pressure > 50 PSI	What	Null	Null	Null	Feedforward	Medium	True	ON	10	Medium	Null	Null	08/05/2024 18:54:06	Closed	Closed	OFF	Unemployed	Closed	OFF	OFF	OFF	OFF	OFF	ON	25°	3 mm	ON	ON	0	OFF	OFF	OFF	OFF	OFF	OFF	OFF	OFF	Closed	OFF	OFF	OFF
					100	Low Air Quality	Activate Air Sanitation	CO2 level > 100 & House Users > 0	What	Null	Null	Null	Feedback	High	True	ON	5	Medium	Null	Null	08/05/2024 10:54:05	Closed	Closed	OFF	Unemployed	Open	OFF	OFF	OFF	OFF	OFF	ON	35°	0 mm	ON	ON	0	ON	OFF	OFF	OFF	OFF	OFF	OFF	OFF	Closed	OFF	OFF	OFF
					101	Low Air Quality	Activate Air Sanitation	CO2 level > 100 & House Users > 0	What	Null	Null	Null	Feedback	Low	True	ON	6	Medium	Null	Null	08/05/2024 16:54:05	Closed	Closed	OFF	Unemployed	Open	OFF	OFF	OFF	OFF	OFF	ON	35°	0 mm	ON	ON	0	ON	OFF	OFF	OFF	OFF	OFF	OFF	OFF	Closed	OFF	OFF	OFF
					102	Low Air Quality	Activate Air Sanitation	CO2 level > 100 & House Users > 0	What	Null	Null	Null	Feedback	Medium	True	ON	7	Medium	Null	Null	08/05/2024 18:54:05	Closed	Closed	OFF	Unemployed	Closed	OFF	OFF	OFF	OFF	OFF	ON	25°	0 mm	ON	ON	0	OFF	OFF	OFF	OFF	OFF	OFF	OFF	OFF	Closed	OFF	OFF	OFF
					103	System Upgrade	Lock Temperature Controller	Null	What	Null	Null	Null	Feedback-Adaptation	High	True	ON	5	Medium	Null	Null	08/05/2024 10:54:05	Closed	Closed	OFF	Unemployed	Open	OFF	OFF	OFF	OFF	OFF	ON	35°	0 mm	ON	ON	0	UPDATE	UPDATE	OFF	OFF	OFF	OFF	OFF	OFF	Closed	OFF	OFF	OFF
					104	System Upgrade	Lock Temperature Controller	Null	What	Null	Null	Null	Feedback-Adaptation	Low	True	ON	6	Medium	Null	Null	08/05/2024 16:54:05	Closed	Closed	OFF	Unemployed	Open	OFF	OFF	OFF	OFF	OFF	ON	35°	0 mm	ON	ON	0	UPDATE	UPDATE	OFF	OFF	OFF	OFF	OFF	OFF	Closed	OFF	OFF	OFF
					105	System Upgrade	Lock Temperature Controller	Null	What	Null	Null	Null	Feedback-Adaptation	Medium	True	ON	7	Medium	Null	Null	08/05/2024 18:54:05	Closed	Closed	OFF	Unemployed	Closed	OFF	OFF	OFF	OFF	OFF	ON	25°	0 mm	ON	ON	0	UPDATE	UPDATE	OFF	OFF	OFF	OFF	OFF	OFF	Closed	OFF	OFF	OFF
					106	Intruder Detection	Activate Alarm	Null	What	Null	Null	Null	Feedback	High	True	ON	5	Medium	Null	Null	08/05/2024 10:54:05	Closed	Closed	OFF	Unemployed	Open	OFF	OFF	OFF	OFF	OFF	ON	35°	0 mm	ON	ON	1	ON	OFF	OFF	OFF	OFF	OFF	OFF	OFF	Closed	OFF	OFF	OFF
					107	Intruder Detection	Activate Alarm	Null	What	Null	Null	Null	Feedback	Low	True	ON	6	Medium	Null	Null	08/05/2024 16:54:05	Closed	Closed	OFF	Unemployed	Open	OFF	OFF	OFF	OFF	OFF	ON	35°	0 mm	ON	ON	1	ON	OFF	OFF	OFF	OFF	OFF	OFF	OFF	Closed	OFF	OFF	OFF
					108	Intruder Detection	Activate Alarm	Null	What	Null	Null	Null	Feedback	Medium	True	ON	7	Medium	Null	Null	08/05/2024 18:54:05	Closed	Closed	OFF	Unemployed	Closed	OFF	OFF	OFF	OFF	OFF	ON	25°	0 mm	ON	ON	1	OFF	OFF	OFF	OFF	OFF	OFF	OFF	OFF	Closed	OFF	OFF	OFF
					109	Lost Connection Server Security	Save data on local server	Null	What	Null	Null	Null	Feedback-Adaptation	High	True	ON	5	Medium	Null	Null	08/05/2024 10:54:05	Closed	Closed	OFF	Unemployed	Open	OFF	OFF	OFF	OFF	OFF	ON	35°	0 mm	ON	OFF	0	ON	OFF	OFF	OFF	OFF	OFF	OFF	OFF	Closed	OFF	OFF	OFF
					110	Lost Connection Server Security	Save data on local server	Null	What	Null	Null	Null	Feedback-Adaptation	Low	True	ON	6	Medium	Null	Null	08/05/2024 16:54:05	Closed	Closed	OFF	Unemployed	Open	OFF	OFF	OFF	OFF	OFF	ON	35°	0 mm	ON	OFF	0	ON	OFF	OFF	OFF	OFF	OFF	OFF	OFF	Closed	OFF	OFF	OFF
					111	Lost Connection Server Security	Save data on local server	Null	What	Null	Null	Null	Feedback-Adaptation	Medium	True	ON	7	Medium	Null	Null	08/05/2024 18:54:05	Closed	Closed	OFF	Unemployed	Closed	OFF	OFF	OFF	OFF	OFF	ON	25°	0 mm	ON	OFF	0	OFF	OFF	OFF	OFF	OFF	OFF	OFF	OFF	Closed	OFF	OFF	OFF
					112	Turn on Heating	Close Manual Window	Window-Open = false	What	Null	Null	Null	Feedforward	High	True	ON	5	Medium	Null	Null	08/05/2024 10:54:05	Closed	Closed	OFF	Unemployed	Open	OFF	OFF	OFF	OFF	OFF	ON	5°	0 mm	ON	ON	0	OFF	OFF	OFF	OFF	OFF	OFF	OFF	OFF	Closed	OFF	OFF	OFF
					113	Turn on Heating	Close Manual Window	Window-Open = false	What	Null	Null	Null	Feedforward	Low	True	ON	6	Medium	Null	Null	08/05/2024 16:54:05	Closed	Closed	OFF	Unemployed	Open	OFF	OFF	OFF	OFF	OFF	ON	5°	0 mm	ON	ON	0	OFF	OFF	OFF	OFF	OFF	OFF	OFF	OFF	Closed	OFF	OFF	OFF
					114	Turn on Heating	Close Manual Window	Window-Open = false	What	Null	Null	Null	Feedforward	Medium	True	ON	7	Medium	Null	Null	08/05/2024 18:54:05	Closed	Closed	OFF	Unemployed	Closed	OFF	OFF	OFF	OFF	OFF	ON	5°	0 mm	ON	ON	0	OFF	OFF	OFF	OFF	OFF	OFF	OFF	OFF	Closed	OFF	OFF	OFF
					115	User Rest	Enable System Security	User Confirmation = true	What	Null	Null	Null	Feedforward	High	True	ON	5	Medium	Null	Null	08/05/2024 23:54:05	Closed	Closed	ON	Busy	Closed	OFF	OFF	OFF	OFF	OFF	ON	35°	0 mm	ON	ON	0	OFF	OFF	OFF	OFF	OFF	OFF	OFF	OFF	Closed	OFF	OFF	OFF
					116	User Rest	Enable System Security	User Confirmation = true	What	Null	Null	Null	Feedforward	Low	True	ON	6	Medium	Null	Null	09/05/2024 22:54:05	Closed	Closed	ON	Busy	Closed	OFF	OFF	OFF	OFF	OFF	ON	35°	0 mm	ON	ON	0	OFF	OFF	OFF	OFF	OFF	OFF	OFF	OFF	Closed	OFF	OFF	OFF
					117	User Rest	Enable System Security	User Confirmation = true	What	Null	Null	Null	Feedforward	Medium	True	ON	7	Medium	Null	Null	10/05/2024 23:43:05	Closed	Closed	ON	Busy	Closed	OFF	OFF	OFF	OFF	OFF	ON	25°	0 mm	ON	ON	0	OFF	OFF	OFF	OFF	OFF	OFF	OFF	OFF	Closed	OFF	OFF	OFF
					118	Watering Time	Activate Sprinklers	No users in the garden	What	Null	Null	Null	Feedback	High	False	ON	5	Medium	Null	Null	08/05/2024 10:54:05	Closed	Closed	OFF	Unemployed	Open	OFF	OFF	OFF	OFF	OFF	ON	35°	0 mm	ON	ON	0	ON	OFF	OFF	OFF	OFF	OFF	OFF	OFF	Closed	OFF	OFF	OFF
					119	Watering Time	Activate Sprinklers	No users in the garden	What	Null	Null	Null	Feedback	Low	False	ON	6	Medium	Null	Null	08/05/2024 16:54:05	Closed	Closed	OFF	Unemployed	Open	OFF	OFF	OFF	OFF	OFF	ON	35°	0 mm	ON	ON	0	ON	OFF	OFF	OFF	OFF	OFF	OFF	OFF	Closed	OFF	OFF	OFF
					120	Watering Time	Activate Sprinklers	No users in the garden	What	Null	Null	Null	Feedback	Medium	False	ON	7	Medium	Null	Null	08/05/2024 18:54:05	Closed	Closed	OFF	Unemployed	Closed	OFF	OFF	OFF	OFF	OFF	ON	25°	0 mm	ON	ON	0	OFF	OFF	OFF	OFF	OFF	OFF	OFF	OFF	Closed	OFF	OFF	OFF
					121	Watering Time	Suspend Sprinklers	Rain Detected = True	What	Null	Null	Null	Feedback-Adaptation	High	False	ON	8	Medium	Null	Null	08/05/2024 10:54:06	Closed	Closed	OFF	Unemployed	Open	OFF	OFF	OFF	OFF	OFF	ON	35°	3 mm	ON	ON	0	ON	OFF	OFF	OFF	OFF	OFF	OFF	OFF	Closed	OFF	OFF	OFF
					122	Watering Time	Suspend Sprinklers	Rain Detected = True	What	Null	Null	Null	Feedback-Adaptation	Low	False	ON	9	Medium	Null	Null	08/05/2024 16:54:06	Closed	Closed	OFF	Unemployed	Open	OFF	OFF	OFF	OFF	OFF	ON	35°	2 mm	ON	ON	0	ON	OFF	OFF	OFF	OFF	OFF	OFF	OFF	Closed	OFF	OFF	OFF
					123	Watering Time	Suspend Sprinklers	Rain Detected = True	What	Null	Null	Null	Feedback-Adaptation	Medium	False	ON	10	Medium	Null	Null	08/05/2024 18:54:06	Closed	Closed	OFF	Unemployed	Closed	OFF	OFF	OFF	OFF	OFF	ON	25°	3 mm	ON	ON	0	OFF	OFF	OFF	OFF	OFF	OFF	OFF	OFF	Closed	OFF	OFF	OFF
					124	Anomalous Pressure	Manual Adjustment	Sprinkler Pressure > 50 PSI	What	Null	Null	Null	Feedforward	High	False	ON	8	Medium	Null	Null	08/05/2024 10:54:06	Closed	Closed	OFF	Unemployed	Open	OFF	OFF	OFF	OFF	OFF	ON	35°	3 mm	ON	ON	0	ON	OFF	OFF	OFF	OFF	OFF	OFF	OFF	Closed	OFF	OFF	OFF
					125	Anomalous Pressure	Manual Adjustment	Sprinkler Pressure > 50 PSI	What	Null	Null	Null	Feedforward	Low	False	ON	9	Medium	Null	Null	08/05/2024 16:54:06	Closed	Closed	OFF	Unemployed	Open	OFF	OFF	OFF	OFF	OFF	ON	35°	2 mm	ON	ON	0	ON	OFF	OFF	OFF	OFF	OFF	OFF	OFF	Closed	OFF	OFF	OFF
					126	Anomalous Pressure	Manual Adjustment	Sprinkler Pressure > 50 PSI	What	Null	Null	Null	Feedforward	Medium	False	ON	10	Medium	Null	Null	08/05/2024 18:54:06	Closed	Closed	OFF	Unemployed	Closed	OFF	OFF	OFF	OFF	OFF	ON	25°	3 mm	ON	ON	0	OFF	OFF	OFF	OFF	OFF	OFF	OFF	OFF	Closed	OFF	OFF	OFF
					127	Low Air Quality	Activate Air Sanitation	CO2 level > 100 & House Users > 0	What	Null	Null	Null	Feedback	High	False	ON	5	Medium	Null	Null	08/05/2024 10:54:05	Closed	Closed	OFF	Unemployed	Open	OFF	OFF	OFF	OFF	OFF	ON	35°	0 mm	ON	ON	0	ON	OFF	OFF	OFF	OFF	OFF	OFF	OFF	Closed	OFF	OFF	OFF
					128	Low Air Quality	Activate Air Sanitation	CO2 level > 100 & House Users > 0	What	Null	Null	Null	Feedback	Low	False	ON	6	Medium	Null	Null	08/05/2024 16:54:05	Closed	Closed	OFF	Unemployed	Open	OFF	OFF	OFF	OFF	OFF	ON	35°	0 mm	ON	ON	0	ON	OFF	OFF	OFF	OFF	OFF	OFF	OFF	Closed	OFF	OFF	OFF
					129	Low Air Quality	Activate Air Sanitation	CO2 level > 100 & House Users > 0	What	Null	Null	Null	Feedback	Medium	False	ON	7	Medium	Null	Null	08/05/2024 18:54:05	Closed	Closed	OFF	Unemployed	Closed	OFF	OFF	OFF	OFF	OFF	ON	25°	0 mm	ON	ON	0	OFF	OFF	OFF	OFF	OFF	OFF	OFF	OFF	Closed	OFF	OFF	OFF
					130	System Upgrade	Lock Temperature Controller	Null	What	Null	Null	Null	Feedback-Adaptation	High	False	ON	5	Medium	Null	Null	08/05/2024 10:54:05	Closed	Closed	OFF	Unemployed	Open	OFF	OFF	OFF	OFF	OFF	ON	35°	0 mm	ON	ON	0	UPDATE	UPDATE	OFF	OFF	OFF	OFF	OFF	OFF	Closed	OFF	OFF	OFF
					131	System Upgrade	Lock Temperature Controller	Null	What	Null	Null	Null	Feedback-Adaptation	Low	False	ON	6	Medium	Null	Null	08/05/2024 16:54:05	Closed	Closed	OFF	Unemployed	Open	OFF	OFF	OFF	OFF	OFF	ON	35°	0 mm	ON	ON	0	UPDATE	UPDATE	OFF	OFF	OFF	OFF	OFF	OFF	Closed	OFF	OFF	OFF
					132	System Upgrade	Lock Temperature Controller	Null	What	Null	Null	Null	Feedback-Adaptation	Medium	False	ON	7	Medium	Null	Null	08/05/2024 18:54:05	Closed	Closed	OFF	Unemployed	Closed	OFF	OFF	OFF	OFF	OFF	ON	25°	0 mm	ON	ON	0	UPDATE	UPDATE	OFF	OFF	OFF	OFF	OFF	OFF	Closed	OFF	OFF	OFF
					133	Intruder Detection	Activate Alarm	Null	What	Null	Null	Null	Feedback	High	False	ON	5	Medium	Null	Null	08/05/2024 10:54:05	Closed	Closed	OFF	Unemployed	Open	OFF	OFF	OFF	OFF	OFF	ON	35°	0 mm	ON	ON	1	ON	OFF	OFF	OFF	OFF	OFF	OFF	OFF	Closed	OFF	OFF	OFF
					134	Intruder Detection	Activate Alarm	Null	What	Null	Null	Null	Feedback	Low	False	ON	6	Medium	Null	Null	08/05/2024 16:54:05	Closed	Closed	OFF	Unemployed	Open	OFF	OFF	OFF	OFF	OFF	ON	35°	0 mm	ON	ON	1	ON	OFF	OFF	OFF	OFF	OFF	OFF	OFF	Closed	OFF	OFF	OFF
					135	Intruder Detection	Activate Alarm	Null	What	Null	Null	Null	Feedback	Medium	False	ON	7	Medium	Null	Null	08/05/2024 18:54:05	Closed	Closed	OFF	Unemployed	Closed	OFF	OFF	OFF	OFF	OFF	ON	25°	0 mm	ON	ON	1	OFF	OFF	OFF	OFF	OFF	OFF	OFF	OFF	Closed	OFF	OFF	OFF
					136	Lost Connection Server Security	Save data on local server	Null	What	Null	Null	Null	Feedback-Adaptation	High	False	ON	5	Medium	Null	Null	08/05/2024 10:54:05	Closed	Closed	OFF	Unemployed	Open	OFF	OFF	OFF	OFF	OFF	ON	35°	0 mm	ON	OFF	0	ON	OFF	OFF	OFF	OFF	OFF	OFF	OFF	Closed	OFF	OFF	OFF
					137	Lost Connection Server Security	Save data on local server	Null	What	Null	Null	Null	Feedback-Adaptation	Low	False	ON	6	Medium	Null	Null	08/05/2024 16:54:05	Closed	Closed	OFF	Unemployed	Open	OFF	OFF	OFF	OFF	OFF	ON	35°	0 mm	ON	OFF	0	ON	OFF	OFF	OFF	OFF	OFF	OFF	OFF	Closed	OFF	OFF	OFF
					138	Lost Connection Server Security	Save data on local server	Null	What	Null	Null	Null	Feedback-Adaptation	Medium	False	ON	7	Medium	Null	Null	08/05/2024 18:54:05	Closed	Closed	OFF	Unemployed	Closed	OFF	OFF	OFF	OFF	OFF	ON	25°	0 mm	ON	OFF	0	OFF	OFF	OFF	OFF	OFF	OFF	OFF	OFF	Closed	OFF	OFF	OFF
					139	Turn on Heating	Close Manual Window	Window-Open = false	What	Null	Null	Null	Feedforward	High	False	ON	5	Medium	Null	Null	08/05/2024 10:54:05	Closed	Closed	OFF	Unemployed	Open	OFF	OFF	OFF	OFF	OFF	ON	5°	0 mm	ON	ON	0	OFF	OFF	OFF	OFF	OFF	OFF	OFF	OFF	Closed	OFF	OFF	OFF
					140	Turn on Heating	Close Manual Window	Window-Open = false	What	Null	Null	Null	Feedforward	Low	False	ON	6	Medium	Null	Null	08/05/2024 16:54:05	Closed	Closed	OFF	Unemployed	Open	OFF	OFF	OFF	OFF	OFF	ON	5°	0 mm	ON	ON	0	OFF	OFF	OFF	OFF	OFF	OFF	OFF	OFF	Closed	OFF	OFF	OFF
					141	Turn on Heating	Close Manual Window	Window-Open = false	What	Null	Null	Null	Feedforward	Medium	False	ON	7	Medium	Null	Null	08/05/2024 18:54:05	Closed	Closed	OFF	Unemployed	Closed	OFF	OFF	OFF	OFF	OFF	ON	5°	0 mm	ON	ON	0	OFF	OFF	OFF	OFF	OFF	OFF	OFF	OFF	Closed	OFF	OFF	OFF
					142	User Rest	Enable System Security	User Confirmation = true	What	Null	Null	Null	Feedforward	High	False	ON	5	Medium	Null	Null	08/05/2024 23:54:05	Closed	Closed	ON	Busy	Closed	OFF	OFF	OFF	OFF	OFF	ON	35°	0 mm	ON	ON	0	OFF	OFF	OFF	OFF	OFF	OFF	OFF	OFF	Closed	OFF	OFF	OFF
					143	User Rest	Enable System Security	User Confirmation = true	What	Null	Null	Null	Feedforward	Low	False	ON	6	Medium	Null	Null	09/05/2024 22:54:05	Closed	Closed	ON	Busy	Closed	OFF	OFF	OFF	OFF	OFF	ON	35°	0 mm	ON	ON	0	OFF	OFF	OFF	OFF	OFF	OFF	OFF	OFF	Closed	OFF	OFF	OFF
					144	User Rest	Enable System Security	User Confirmation = true	What	Null	Null	Null	Feedforward	Medium	False	ON	7	Medium	Null	Null	10/05/2024 23:43:05	Closed	Closed	ON	Busy	Closed	OFF	OFF	OFF	OFF	OFF	ON	25°	0 mm	ON	ON	0	OFF	OFF	OFF	OFF	OFF	OFF	OFF	OFF	Closed	OFF	OFF	OFF
						Feedforward (07.06.2024)	Template (V.2)
					145	User Rest	Enable System Security	User Confirmation = true	What	Null	Null	Null	Feedforward	High	True	ON	5	Medium	Null	False	08/05/2024 23:54:05	Closed	Closed	ON	Busy	Closed	OFF	OFF	OFF	OFF	OFF	ON	35°	0 mm	ON	ON	0	OFF	OFF	OFF	OFF	OFF	OFF	OFF	OFF	Closed	OFF	OFF	OFF
					146	User Rest	Enable System Security	User Confirmation = true	What	Null	Null	Null	Feedforward	Low	True	ON	6	Medium	Null	False	09/05/2024 22:54:05	Closed	Closed	ON	Busy	Closed	OFF	OFF	OFF	OFF	OFF	ON	35°	0 mm	ON	ON	0	OFF	OFF	OFF	OFF	OFF	OFF	OFF	OFF	Closed	OFF	OFF	OFF
					147	User Rest	Enable System Security	User Confirmation = true	What	Null	Null	Null	Feedforward	Medium	True	ON	7	Medium	Null	False	10/05/2024 23:43:05	Closed	Closed	ON	Busy	Closed	OFF	OFF	OFF	OFF	OFF	ON	25°	0 mm	ON	ON	0	OFF	OFF	OFF	OFF	OFF	OFF	OFF	OFF	Closed	OFF	OFF	OFF
					148	User Rest	Enable System Security	User Confirmation = true	What	Null	Null	Null	Feedforward	High	False	ON	5	Medium	Null	False	08/05/2024 23:54:05	Closed	Closed	ON	Busy	Closed	OFF	OFF	OFF	OFF	OFF	ON	35°	0 mm	ON	ON	0	OFF	OFF	OFF	OFF	OFF	OFF	OFF	OFF	Closed	OFF	OFF	OFF
					149	User Rest	Enable System Security	User Confirmation = true	What	Null	Null	Null	Feedforward	Low	False	ON	6	Medium	Null	False	09/05/2024 22:54:05	Closed	Closed	ON	Busy	Closed	OFF	OFF	OFF	OFF	OFF	ON	35°	0 mm	ON	ON	0	OFF	OFF	OFF	OFF	OFF	OFF	OFF	OFF	Closed	OFF	OFF	OFF
					150	User Rest	Enable System Security	User Confirmation = true	What	Null	Null	Null	Feedforward	Medium	False	ON	7	Medium	Null	False	10/05/2024 23:43:05	Closed	Closed	ON	Busy	Closed	OFF	OFF	OFF	OFF	OFF	ON	25°	0 mm	ON	ON	0	OFF	OFF	OFF	OFF	OFF	OFF	OFF	OFF	Closed	OFF	OFF	OFF
					151	Anomalous Pressure	Manual Adjustment	Sprinkler Pressure > 50 PSI	What	Null	Null	Null	Feedforward	High	True	ON	8	Medium	Null	Null	08/05/2024 10:54:06	Closed	Closed	OFF	Unemployed	Open	OFF	OFF	OFF	OFF	OFF	ON	35°	3 mm	ON	ON	0	ON	OFF	OFF	OFF	OFF	OFF	OFF	OFF	Closed	OFF	OFF	OFF
					152	Anomalous Pressure	Manual Adjustment	Sprinkler Pressure > 50 PSI	What	Null	Null	Null	Feedforward	Low	True	ON	9	Medium	Null	Null	08/05/2024 16:54:06	Closed	Closed	OFF	Unemployed	Open	OFF	OFF	OFF	OFF	OFF	ON	35°	2 mm	ON	ON	0	ON	OFF	OFF	OFF	OFF	OFF	OFF	OFF	Closed	OFF	OFF	OFF
					153	Anomalous Pressure	Manual Adjustment	Sprinkler Pressure > 50 PSI	What	Null	Null	Null	Feedforward	Medium	True	ON	10	Medium	Null	Null	08/05/2024 18:54:06	Closed	Closed	OFF	Unemployed	Closed	OFF	OFF	OFF	OFF	OFF	ON	25°	3 mm	ON	ON	0	OFF	OFF	OFF	OFF	OFF	OFF	OFF	OFF	Closed	OFF	OFF	OFF
					154	Anomalous Pressure	Manual Adjustment	Sprinkler Pressure > 50 PSI	What	Null	Null	Null	Feedforward	High	False	ON	8	Medium	Null	Null	08/05/2024 10:54:06	Closed	Closed	OFF	Unemployed	Open	OFF	OFF	OFF	OFF	OFF	ON	35°	3 mm	ON	ON	0	ON	OFF	OFF	OFF	OFF	OFF	OFF	OFF	Closed	OFF	OFF	OFF
					155	Anomalous Pressure	Manual Adjustment	Sprinkler Pressure > 50 PSI	What	Null	Null	Null	Feedforward	Low	False	ON	9	Medium	Null	Null	08/05/2024 16:54:06	Closed	Closed	OFF	Unemployed	Open	OFF	OFF	OFF	OFF	OFF	ON	35°	2 mm	ON	ON	0	ON	OFF	OFF	OFF	OFF	OFF	OFF	OFF	Closed	OFF	OFF	OFF
					156	Anomalous Pressure	Manual Adjustment	Sprinkler Pressure > 50 PSI	What	Null	Null	Null	Feedforward	Medium	False	ON	10	Medium	Null	Null	08/05/2024 18:54:06	Closed	Closed	OFF	Unemployed	Closed	OFF	OFF	OFF	OFF	OFF	ON	25°	3 mm	ON	ON	0	OFF	OFF	OFF	OFF	OFF	OFF	OFF	OFF	Closed	OFF	OFF	OFF
					157	Turn on Heating	Close Manual Window	Window-Open = false	What	Null	Null	Null	Feedforward	High	True	ON	5	Medium	Null	Null	08/05/2024 10:54:05	Closed	Closed	OFF	Unemployed	Open	OFF	OFF	OFF	OFF	OFF	ON	5°	0 mm	ON	ON	0	OFF	OFF	OFF	OFF	OFF	OFF	OFF	OFF	Closed	OFF	OFF	OFF
					158	Turn on Heating	Close Manual Window	Window-Open = false	What	Null	Null	Null	Feedforward	Low	True	ON	6	Medium	Null	Null	08/05/2024 16:54:05	Closed	Closed	OFF	Unemployed	Open	OFF	OFF	OFF	OFF	OFF	ON	5°	0 mm	ON	ON	0	OFF	OFF	OFF	OFF	OFF	OFF	OFF	OFF	Closed	OFF	OFF	OFF
					159	Turn on Heating	Close Manual Window	Window-Open = false	What	Null	Null	Null	Feedforward	Medium	True	ON	7	Medium	Null	Null	08/05/2024 18:54:05	Closed	Closed	OFF	Unemployed	Closed	OFF	OFF	OFF	OFF	OFF	ON	5°	0 mm	ON	ON	0	OFF	OFF	OFF	OFF	OFF	OFF	OFF	OFF	Closed	OFF	OFF	OFF
					160	Turn on Heating	Close Manual Window	Window-Open = false	What	Null	Null	Null	Feedforward	High	False	ON	5	Medium	Null	Null	08/05/2024 10:54:05	Closed	Closed	OFF	Unemployed	Open	OFF	OFF	OFF	OFF	OFF	ON	5°	0 mm	ON	ON	0	OFF	OFF	OFF	OFF	OFF	OFF	OFF	OFF	Closed	OFF	OFF	OFF
					161	Turn on Heating	Close Manual Window	Window-Open = false	What	Null	Null	Null	Feedforward	Low	False	ON	6	Medium	Null	Null	08/05/2024 16:54:05	Closed	Closed	OFF	Unemployed	Open	OFF	OFF	OFF	OFF	OFF	ON	5°	0 mm	ON	ON	0	OFF	OFF	OFF	OFF	OFF	OFF	OFF	OFF	Closed	OFF	OFF	OFF
					162	Turn on Heating	Close Manual Window	Window-Open = false	What	Null	Null	Null	Feedforward	Medium	False	ON	7	Medium	Null	Null	08/05/2024 18:54:05	Closed	Closed	OFF	Unemployed	Closed	OFF	OFF	OFF	OFF	OFF	ON	5°	0 mm	ON	ON	0	OFF	OFF	OFF	OFF	OFF	OFF	OFF	OFF	Closed	OFF	OFF	OFF
					163	Supermarket Purchase	Purchase Request	User Confirmation = true	What	Null	Null	Null	Feedforward	High	True	ON	0	Low	Wait	Null	08/05/2024 10:54:05	Closed	Closed	OFF	Unemployed	Open	OFF	OFF	OFF	OFF	OFF	ON	35°	0 mm	ON	ON	0	ON	OFF	OFF	OFF	OFF	OFF	OFF	OFF	Closed	OFF	OFF	OFF
					164	Supermarket Purchase	Purchase Request	User Confirmation = true	What	Null	Null	Null	Feedforward	Low	True	ON	0	Low	Wait	Null	08/05/2024 16:54:05	Closed	Closed	OFF	Unemployed	Open	OFF	OFF	OFF	OFF	OFF	ON	35°	0 mm	ON	ON	0	ON	OFF	OFF	OFF	OFF	OFF	OFF	OFF	Closed	OFF	OFF	OFF
					165	Supermarket Purchase	Purchase Request	User Confirmation = true	What	Null	Null	Null	Feedforward	Medium	True	ON	0	Low	Wait	Null	08/05/2024 20:54:05	Closed	Closed	OFF	Unemployed	Closed	OFF	OFF	OFF	OFF	OFF	ON	25°	0 mm	ON	ON	0	OFF	OFF	OFF	OFF	OFF	OFF	OFF	OFF	Closed	OFF	OFF	OFF
					166	Supermarket Purchase	Purchase Request	User Confirmation = true	What	Null	Null	Null	Feedforward	High	False	ON	0	Low	Wait	Null	08/05/2024 10:54:05	Closed	Closed	OFF	Unemployed	Open	OFF	OFF	OFF	OFF	OFF	ON	35°	0 mm	ON	ON	0	ON	OFF	OFF	OFF	OFF	OFF	OFF	OFF	Closed	OFF	OFF	OFF
					167	Supermarket Purchase	Purchase Request	User Confirmation = true	What	Null	Null	Null	Feedforward	Low	False	ON	0	Low	Wait	Null	08/05/2024 16:54:05	Closed	Closed	OFF	Unemployed	Open	OFF	OFF	OFF	OFF	OFF	ON	35°	0 mm	ON	ON	0	ON	OFF	OFF	OFF	OFF	OFF	OFF	OFF	Closed	OFF	OFF	OFF
					168	Supermarket Purchase	Purchase Request	User Confirmation = true	What	Null	Null	Null	Feedforward	Medium	False	ON	0	Low	Wait	Null	08/05/2024 20:54:05	Closed	Closed	OFF	Unemployed	Closed	OFF	OFF	OFF	OFF	OFF	ON	25°	0 mm	ON	ON	0	OFF	OFF	OFF	OFF	OFF	OFF	OFF	OFF	Closed	OFF	OFF	OFF
					169	Routine Maintenance Alert	Optimize Energy Consumption	User Confirmation	What	Null	Null	Null	Feedback	Low	True	OFF	34	High	Null	True	08/05/2024 20:54:05	Closed	Closed	ON	Empty	Closed	OFF	ON	OFF	ON	ON	ON	33	0 mm	ON	ON	0	ON	OFF	OFF	OFF	OFF	ON	OFF	OFF	Closed	ON	ON	OFF
					170	Network Latency Issue	Initiate Cooling Protocol	Purchase Service Not Responding and Quantity of Products = 0	What	Null	Null	Null	Feedback	Medium	True	OFF	0	Low	Null	Null	08/05/2024 20:54:06	Closed	Closed	OFF	Empty	Closed	ON	OFF	OFF	OFF	OFF	ON	26	0 mm	OFF	ON	0	OFF	ON	OFF	OFF	ON	OFF	OFF	ON	Closed	OFF	ON	ON
					171	System Overheating	Run Diagnostic Tests	Window-Open = false	What	Null	Null	Null	Feedback	High	True	ON	7	Low	Null	Null	08/05/2024 20:54:07	Open	Closed	OFF	Empty	Open	ON	ON	OFF	OFF	ON	ON	24	0 mm	OFF	ON	0	ON	OFF	OFF	OFF	OFF	OFF	ON	ON	Closed	OFF	OFF	ON
					172	Unauthorized Access Detected	Lock System	Null	What	Why	Null	How	Feedback	Low	True	OFF	9	Low	Null	Null	08/05/2024 20:54:08	Closed	Closed	OFF	Empty	Closed	OFF	OFF	OFF	OFF	OFF	ON	19	3 mm	ON	ON	0	OFF	ON	ON	ON	OFF	OFF	ON	OFF	Closed	ON	ON	ON
					173	Device Firmware Update Needed	Optimize Energy Consumption	Sprinkler Pressure > 50 PSI	What	Why	Null	How	Feedback	Medium	True	ON	8	Low	Null	Null	08/05/2024 20:54:09	Open	Open	ON	Occupied	Open	OFF	ON	OFF	OFF	ON	ON	21	2 mm	ON	ON	0	ON	OFF	OFF	OFF	OFF	ON	OFF	OFF	Closed	OFF	ON	OFF
					174	Temperature Sensor Failure	Notify Security Personnel	Null	What	Why	Null	How	Feedback	High	True	ON	17	Medium	Null	Null	08/05/2024 20:54:10	Open	Open	ON	Empty	Closed	OFF	OFF	OFF	OFF	OFF	ON	15	3 mm	ON	ON	0	OFF	ON	ON	ON	OFF	ON	OFF	OFF	Closed	OFF	OFF	ON
					175	Unauthorized Access Detected	Dispatch Maintenance Team	No users in the garden	What	Why	Null	How	Feedback	Low	True	OFF	16	Medium	Null	Null	08/05/2024 20:54:11	Closed	Open	OFF	Occupied	Closed	ON	ON	OFF	ON	OFF	ON	18	3 mm	ON	ON	0	OFF	ON	OFF	OFF	OFF	OFF	ON	ON	Closed	OFF	OFF	OFF
					176	Unusual Activity Detected	Activate Fire Suppression System	Rain Detected = True	What	Why	Null	How	Feedback-Adaptation	Medium	True	OFF	17	Medium	Null	Null	08/05/2024 20:54:12	Closed	Closed	OFF	Occupied	Closed	ON	ON	OFF	ON	ON	ON	25	42 mm	OFF	ON	0	ON	ON	ON	OFF	ON	ON	ON	ON	Closed	ON	OFF	OFF
					177	Routine Maintenance Alert	Optimize Energy Consumption	CO2 level > 100 & House Users > 0	What	Why	Null	How	Feedback	High	True	OFF	13	Low	Null	Null	08/05/2024 20:54:13	Closed	Open	OFF	Occupied	Open	OFF	ON	OFF	ON	OFF	ON	23	3 mm	ON	ON	0	OFF	ON	OFF	OFF	ON	ON	ON	ON	Closed	OFF	ON	OFF
					178	Device Firmware Update Needed	Notify Security Personnel	Window-Open = false	What	Why	Null	How	Feedback	Low	False	ON	11	Low	Null	Null	08/05/2024 20:54:14	Open	Closed	ON	Empty	Closed	OFF	ON	OFF	ON	ON	ON	25	0 mm	OFF	ON	0	OFF	OFF	OFF	ON	OFF	ON	ON	OFF	Closed	ON	ON	OFF
					179	Network Latency Issue	Initiate Cooling Protocol	Purchase Service Not Responding and Quantity of Products = 0	What	Null	Null	Null	Feedback-Adaptation	Medium	False	ON	0	Low	Null	Null	08/05/2024 20:54:15	Open	Open	ON	Occupied	Open	ON	OFF	OFF	ON	OFF	ON	23	0 mm	ON	ON	0	OFF	OFF	ON	OFF	ON	OFF	ON	OFF	Closed	OFF	ON	OFF
					180	Energy Usage Spike	Send Alert to Admin	CO2 level > 100 & House Users > 0	What	Null	Null	Null	Feedback-Adaptation	High	False	ON	16	Medium	Null	Null	08/05/2024 20:54:16	Open	Open	OFF	Occupied	Open	ON	ON	ON	ON	OFF	ON	32	0 mm	ON	ON	0	OFF	OFF	OFF	OFF	ON	ON	ON	OFF	Closed	OFF	ON	ON
					181	Power Surge Detected	Trigger Backup Systems	No users in the garden	What	Why	Null	Null	Feedback-Adaptation	Low	False	ON	3	Low	Null	Null	08/05/2024 20:54:17	Open	Open	ON	Empty	Closed	ON	ON	ON	ON	ON	ON	20	0 mm	ON	ON	0	OFF	OFF	OFF	ON	OFF	ON	OFF	OFF	Closed	ON	ON	ON
					182	Smoke Alarm Triggered	Lock System	User Confirmation = true	What	Why	Null	Null	Feedback	Medium	False	ON	15	Medium	Null	True	08/05/2024 20:54:18	Closed	Closed	ON	Occupied	Closed	OFF	OFF	ON	ON	OFF	ON	16	0 mm	OFF	ON	0	OFF	OFF	ON	ON	ON	OFF	ON	ON	Closed	ON	OFF	ON
					183	Water Leak Identified	Send Alert to Admin	CO2 level > 100 & House Users > 0	What	Why	Null	Null	Feedback-Adaptation	High	False	OFF	42	High	Null	Null	08/05/2024 20:54:19	Open	Closed	ON	Empty	Open	ON	ON	ON	OFF	OFF	ON	33	0 mm	ON	ON	0	OFF	OFF	OFF	OFF	OFF	ON	ON	ON	Closed	ON	ON	ON
					184	Energy Usage Spike	Send Alert to Admin	CO2 level > 100 & House Users > 0	What	Why	Null	Null	Feedback	Low	False	ON	18	Medium	Null	Null	08/05/2024 20:54:20	Open	Closed	ON	Occupied	Closed	ON	ON	OFF	ON	OFF	ON	23	0 mm	OFF	ON	0	OFF	OFF	OFF	ON	OFF	ON	OFF	ON	Closed	OFF	ON	OFF
					185	Unexpected Shutdown	Dispatch Maintenance Team	Purchase Service Not Responding and Quantity of Products = 0	What	Why	Null	Null	Feedback-Adaptation	Medium	False	OFF	0	Low	Null	Null	08/05/2024 20:54:21	Closed	Closed	OFF	Occupied	Open	ON	ON	OFF	ON	OFF	ON	23	0 mm	ON	ON	0	OFF	OFF	OFF	OFF	OFF	OFF	ON	OFF	Closed	ON	OFF	OFF
					186	Routine Maintenance Alert	Optimize Energy Consumption	Window-Open = false	What	Why	Null	Null	Feedback-Adaptation	High	False	OFF	8	Low	Null	Null	08/05/2024 20:54:22	Open	Open	ON	Empty	Closed	ON	OFF	OFF	OFF	OFF	ON	28	0 mm	ON	ON	0	OFF	OFF	OFF	OFF	OFF	OFF	OFF	OFF	Closed	OFF	OFF	OFF
					187	Device Firmware Update Needed	Run Diagnostic Tests	CO2 level > 100 & House Users > 0	What	Why	Null	Null	Feedback-Adaptation	Low	False	ON	9	Low	Null	Null	08/05/2024 20:54:23	Closed	Closed	ON	Occupied	Closed	ON	ON	ON	ON	OFF	ON	22	0 mm	OFF	ON	0	OFF	OFF	OFF	ON	ON	OFF	ON	OFF	Closed	ON	ON	OFF
					188	Unusual Activity Detected	Send Alert to Admin	No users in the garden	What	Why	Null	Null	Feedback	Medium	False	ON	7	Low	Null	Null	08/05/2024 20:54:24	Open	Closed	ON	Empty	Open	ON	OFF	ON	ON	OFF	ON	32	0 mm	OFF	ON	0	OFF	OFF	ON	ON	ON	OFF	OFF	ON	Closed	ON	OFF	ON
					189	Temperature Sensor Failure	Dispatch Maintenance Team	Sprinkler Pressure > 50 PSI	What	Null	Null	Null	Feedback-Adaptation	High	False	ON	15	Medium	Null	Null	08/05/2024 20:54:25	Open	Closed	ON	Empty	Open	ON	ON	OFF	OFF	OFF	ON	32	0 mm	ON	ON	0	OFF	OFF	OFF	ON	ON	OFF	ON	ON	Closed	OFF	ON	ON
					190	System Overheating	Dispatch Maintenance Team	Sprinkler Pressure > 50 PSI	What	Null	Null	Null	Feedback-Adaptation	Low	False	OFF	9	Medium	Null	Null	08/05/2024 20:54:26	Closed	Open	OFF	Empty	Closed	OFF	ON	OFF	ON	ON	ON	30	0 mm	OFF	ON	0	OFF	OFF	OFF	OFF	OFF	OFF	OFF	OFF	Closed	OFF	ON	ON
					191	Unexpected Shutdown	Initiate Cooling Protocol	No users in the garden	What	Null	Null	Null	Feedback-Adaptation	Medium	False	ON	9	Medium	Null	Null	08/05/2024 20:54:27	Closed	Closed	OFF	Occupied	Closed	OFF	ON	OFF	ON	OFF	ON	28	0 mm	OFF	ON	0	OFF	OFF	OFF	ON	OFF	ON	OFF	OFF	Closed	OFF	OFF	OFF
					192	Water Leak Identified	Shut Down Affected Components	Window-Open = false	What	Null	Null	Null	Feedback-Adaptation	High	False	OFF	42	Medium	Null	Null	08/05/2024 20:54:28	Open	Open	ON	Occupied	Closed	OFF	ON	OFF	ON	ON	ON	31	0 mm	ON	ON	0	OFF	OFF	OFF	ON	OFF	ON	ON	OFF	Closed	ON	ON	ON
					193	System Overheating	Schedule Repair	No users in the garden	What	Null	Null	Null	Feedback	Low	False	ON	14	Medium	Null	Null	08/05/2024 20:54:29	Open	Open	ON	Occupied	Open	ON	ON	ON	ON	ON	ON	30	0 mm	OFF	ON	0	OFF	OFF	OFF	OFF	OFF	ON	ON	ON	Closed	OFF	OFF	OFF
					194	Temperature Sensor Failure	Initiate Cooling Protocol	User Confirmation = true	What	Null	Null	Null	Feedback	Medium	False	ON	4	Low	Null	True	08/05/2024 20:54:30	Open	Open	OFF	Occupied	Closed	OFF	ON	OFF	ON	ON	ON	20	0 mm	ON	ON	0	OFF	OFF	ON	ON	ON	OFF	OFF	ON	Closed	ON	OFF	ON
					195	Smoke Alarm Triggered	Optimize Energy Consumption	User Confirmation = true	What	Null	Null	Null	Feedback	High	False	ON	1	Low	Null	True	08/05/2024 20:54:31	Closed	Open	ON	Occupied	Closed	OFF	OFF	ON	ON	OFF	ON	29	0 mm	OFF	ON	0	OFF	OFF	ON	ON	ON	ON	ON	ON	Closed	OFF	OFF	OFF
					196	Power Surge Detected	Schedule Repair	No users in the garden	What	Null	Null	Null	Feedback-Adaptation	Low	False	OFF	8	Low	Null	Null	08/05/2024 20:54:32	Open	Closed	ON	Occupied	Open	ON	ON	ON	OFF	OFF	ON	20	0 mm	ON	ON	0	OFF	OFF	ON	OFF	OFF	OFF	ON	ON	Closed	OFF	OFF	ON
					197	Smoke Alarm Triggered	Lock System	Purchase Service Not Responding and Quantity of Products = 0	What	Null	Null	Null	Feedback-Adaptation	Medium	False	OFF	0	Low	Null	Null	08/05/2024 20:54:33	Open	Closed	ON	Occupied	Closed	OFF	OFF	OFF	OFF	OFF	ON	20	0 mm	ON	ON	0	OFF	OFF	ON	ON	OFF	ON	ON	ON	Closed	ON	ON	OFF
					198	Network Latency Issue	Notify Security Personnel	Purchase Service Not Responding and Quantity of Products = 0	What	Null	What if	Null	Feedback-Adaptation	High	False	ON	0	Low	Null	Null	08/05/2024 20:54:34	Open	Closed	ON	Occupied	Closed	ON	OFF	ON	ON	OFF	ON	30	0 mm	ON	ON	0	OFF	OFF	ON	ON	ON	OFF	OFF	OFF	Closed	OFF	OFF	OFF
					199	Unexpected Shutdown	Send Alert to Admin	Purchase Service Not Responding and Quantity of Products = 0	What	Null	What if	Null	Feedback	Low	False	OFF	0	Low	Null	Null	08/05/2024 20:54:35	Closed	Open	OFF	Empty	Open	OFF	OFF	ON	OFF	ON	ON	28	3 mm	OFF	ON	0	OFF	OFF	OFF	OFF	OFF	OFF	ON	OFF	Closed	ON	OFF	ON
					200	Energy Usage Spike	Initiate Cooling Protocol	Purchase Service Not Responding and Quantity of Products = 0	What	Null	What if	Null	Feedback-Adaptation	Medium	False	OFF	0	Low	Null	Null	08/05/2024 20:54:36	Closed	Closed	OFF	Occupied	Closed	ON	ON	ON	OFF	OFF	ON	16	2 mm	OFF	ON	0	OFF	OFF	ON	OFF	ON	OFF	OFF	ON	Closed	OFF	ON	ON
					201	Network Latency Issue	Trigger Backup Systems	User Confirmation = true	What	Null	What if	Null	Feedback	High	False	ON	6	Low	Null	True	08/05/2024 20:54:37	Open	Open	ON	Empty	Open	OFF	OFF	OFF	OFF	ON	ON	27	3 mm	OFF	ON	0	OFF	OFF	OFF	OFF	ON	ON	ON	OFF	Closed	ON	ON	ON
					202	Energy Usage Spike	Lock System	User Confirmation = true	What	Null	What if	Null	Feedback	Low	False	ON	7	Low	Null	True	08/05/2024 20:54:38	Open	Closed	OFF	Empty	Open	OFF	ON	ON	ON	OFF	ON	24	3 mm	ON	ON	0	OFF	OFF	ON	OFF	OFF	OFF	ON	OFF	Closed	ON	ON	OFF
					203	Unauthorized Access Detected	Run Diagnostic Tests	Purchase Service Not Responding and Quantity of Products = 0	What	Null	What if	Null	Feedback-Adaptation	Medium	False	OFF	0	Low	Null	Null	08/05/2024 20:54:39	Open	Open	ON	Empty	Open	OFF	OFF	OFF	ON	OFF	ON	27	2 mm	ON	ON	0	OFF	OFF	OFF	OFF	ON	ON	ON	ON	Closed	OFF	OFF	OFF
					204	Device Firmware Update Needed	Trigger Backup Systems	User Confirmation = true	What	Null	What if	Null	Feedback-Adaptation	High	False	OFF	13	Medium	Null	True	08/05/2024 20:54:40	Closed	Open	OFF	Empty	Open	ON	ON	OFF	ON	OFF	ON	22	3 mm	OFF	ON	0	OFF	OFF	ON	OFF	ON	OFF	ON	OFF	Closed	ON	ON	OFF
					205	Routine Maintenance Alert	Initiate Cooling Protocol	User Confirmation = true	What	Null	What if	Null	Feedback	Low	True	ON	14	Medium	Null	True	08/05/2024 20:54:41	Open	Closed	ON	Occupied	Open	ON	ON	OFF	OFF	ON	ON	19	0 mm	ON	ON	0	OFF	OFF	OFF	OFF	ON	ON	ON	OFF	Closed	OFF	ON	OFF
					206	Unusual Activity Detected	Activate Fire Suppression System	User Confirmation	What	Null	What if	Null	Feedback	Medium	True	ON	25	High	Null	False	08/05/2024 20:54:42	Closed	Open	OFF	Occupied	Open	OFF	ON	ON	OFF	OFF	ON	30	0 mm	OFF	ON	0	OFF	OFF	OFF	OFF	ON	ON	OFF	ON	Closed	OFF	ON	ON
					207	Temperature Sensor Failure	Run Diagnostic Tests	Window-Open = false	What	Null	What if	Null	Feedback	High	True	ON	19	Medium	Null	Null	08/05/2024 20:54:43	Open	Closed	OFF	Empty	Closed	ON	ON	ON	ON	ON	ON	15	0 mm	OFF	ON	0	OFF	OFF	ON	OFF	OFF	OFF	OFF	OFF	Closed	ON	OFF	ON
					208	Network Latency Issue	Lock System	Purchase Service Not Responding and Quantity of Products = 0	What	Null	What if	Null	Feedback-Adaptation	Low	False	OFF	0	Low	Null	Null	08/05/2024 20:54:44	Closed	Open	ON	Empty	Closed	OFF	OFF	OFF	ON	OFF	ON	32	0 mm	OFF	ON	0	OFF	OFF	ON	ON	ON	OFF	OFF	OFF	Closed	OFF	ON	ON
					209	Power Surge Detected	Lock System	Purchase Service Not Responding and Quantity of Products = 0	What	Null	What if	Null	Feedback	Medium	False	ON	0	Low	Null	Null	08/05/2024 20:54:45	Closed	Open	ON	Empty	Open	OFF	OFF	OFF	OFF	ON	ON	27	0 mm	OFF	ON	0	OFF	OFF	ON	OFF	OFF	OFF	ON	ON	Closed	ON	ON	OFF
					210	Power Surge Detected	Restart System	Purchase Service Not Responding and Quantity of Products = 0	What	Null	What if	Null	Feedback-Adaptation	High	False	OFF	0	Low	Null	Null	08/05/2024 20:54:46	Closed	Closed	OFF	Empty	Closed	ON	ON	ON	OFF	OFF	ON	20	0 mm	OFF	ON	0	OFF	OFF	ON	OFF	OFF	OFF	ON	OFF	Closed	OFF	OFF	ON
					211	Unauthorized Access Detected	Run Diagnostic Tests	Null	What	Null	What if	Null	Feedback	Low	True	ON	14	Medium	Null	Null	08/05/2024 20:54:47	Closed	Closed	OFF	Empty	Open	OFF	OFF	ON	ON	ON	ON	34	0 mm	ON	ON	0	OFF	OFF	ON	ON	OFF	ON	OFF	ON	Closed	ON	ON	OFF
					212	Water Leak Identified	Schedule Repair	CO2 level > 100 & House Users > 0	What	Null	What if	Null	Feedback-Adaptation	Medium	True	OFF	6	Low	Null	Null	08/05/2024 20:54:48	Open	Closed	OFF	Occupied	Open	ON	ON	ON	ON	OFF	ON	22	0 mm	OFF	ON	0	OFF	OFF	ON	OFF	OFF	OFF	ON	ON	Closed	ON	ON	OFF
					213	Unexpected Shutdown	Schedule Repair	User Confirmation	What	Null	What if	Null	Feedback-Adaptation	High	True	ON	9	Low	Null	False	08/05/2024 20:54:49	Closed	Closed	ON	Occupied	Closed	ON	ON	OFF	OFF	OFF	ON	25	0 mm	OFF	ON	0	OFF	OFF	OFF	ON	ON	OFF	OFF	OFF	Closed	OFF	ON	ON
					214	Device Firmware Update Needed	Trigger Backup Systems	No users in the garden	What	Null	Null	Null	Feedback	Low	False	ON	12	Medium	Null	Null	08/05/2024 20:54:50	Closed	Open	ON	Occupied	Open	ON	OFF	OFF	ON	OFF	ON	33	0 mm	OFF	ON	0	OFF	OFF	OFF	ON	ON	ON	OFF	OFF	Closed	OFF	OFF	ON
					215	System Overheating	Restart System	User Confirmation	What	Null	Null	Null	Feedback	Medium	False	OFF	14	Medium	Null	False	08/05/2024 20:54:51	Closed	Open	ON	Empty	Open	ON	ON	ON	ON	ON	ON	18	0 mm	ON	ON	0	OFF	OFF	ON	ON	OFF	OFF	OFF	OFF	Closed	ON	OFF	OFF
					216	Unusual Activity Detected	Run Diagnostic Tests	Rain Detected = True	What	Null	Null	Null	Feedback	High	False	ON	17	Medium	Null	Null	08/05/2024 20:54:52	Open	Open	ON	Occupied	Open	OFF	ON	OFF	OFF	ON	ON	26	10 mm	ON	ON	0	OFF	OFF	OFF	OFF	ON	ON	ON	OFF	Closed	ON	ON	ON
					217	Unexpected Shutdown	Run Diagnostic Tests	CO2 level > 100 & House Users > 0	What	Null	Null	Null	Feedback	Low	True	OFF	13	Medium	Null	Null	08/05/2024 20:54:53	Closed	Closed	OFF	Occupied	Open	ON	OFF	OFF	ON	OFF	ON	29	3 mm	ON	ON	0	OFF	OFF	ON	OFF	OFF	OFF	ON	ON	Closed	OFF	OFF	ON
					218	Smoke Alarm Triggered	Trigger Backup Systems	CO2 level > 100 & House Users > 0	What	Null	Null	How	Feedback-Adaptation	Medium	True	OFF	40	High	Null	Null	08/05/2024 20:54:54	Closed	Closed	ON	Occupied	Open	ON	OFF	OFF	OFF	ON	ON	18	2 mm	OFF	ON	0	OFF	OFF	ON	ON	ON	OFF	OFF	OFF	Closed	ON	OFF	ON
					219	Power Surge Detected	Send Alert to Admin	Rain Detected = True	What	Null	Null	How	Feedback-Adaptation	High	True	OFF	26	High	Null	Null	08/05/2024 20:54:55	Open	Closed	OFF	Occupied	Closed	ON	OFF	ON	ON	ON	ON	31	13 mm	ON	ON	0	OFF	OFF	OFF	OFF	OFF	OFF	OFF	OFF	Closed	ON	ON	OFF
					220	Water Leak Identified	Run Diagnostic Tests	User Confirmation = true	What	Null	Null	How	Feedback	Low	False	OFF	27	High	True	Null	08/05/2024 20:54:56	Closed	Open	OFF	Empty	Open	OFF	OFF	ON	ON	ON	ON	22	3 mm	ON	ON	0	OFF	OFF	OFF	ON	OFF	ON	OFF	ON	Closed	OFF	ON	OFF
					221	Unusual Activity Detected	Optimize Energy Consumption	Purchase Service Not Responding and Quantity of Products = 0	What	Null	Null	How	Feedback	Medium	False	OFF	0	Low	Null	Null	08/05/2024 20:54:57	Closed	Open	ON	Occupied	Open	ON	ON	ON	ON	OFF	ON	31	2 mm	ON	ON	0	OFF	OFF	OFF	ON	ON	OFF	ON	ON	Closed	ON	ON	ON
					222	Unexpected Shutdown	Restart System	Sprinkler Pressure > 50 PSI	What	Null	Null	How	Feedback	High	False	OFF	6	High	Null	Null	08/05/2024 20:54:58	Closed	Closed	OFF	Empty	Closed	OFF	ON	ON	OFF	ON	ON	34	3 mm	ON	ON	0	OFF	OFF	OFF	OFF	OFF	ON	ON	ON	Closed	OFF	OFF	OFF
					223	Device Firmware Update Needed	Run Diagnostic Tests	No users in the garden	What	Null	Null	How	Feedback	Low	True	OFF	6	High	Null	Null	08/05/2024 20:54:59	Open	Open	OFF	Empty	Closed	ON	ON	OFF	OFF	ON	ON	21	0 mm	ON	ON	0	OFF	OFF	ON	ON	ON	OFF	OFF	ON	Closed	OFF	ON	OFF
					224	Unexpected Shutdown	Dispatch Maintenance Team	Null	What	Null	Null	How	Feedback	Medium	True	ON	16	Medium	Null	Null	08/05/2024 20:54:60	Open	Open	OFF	Empty	Open	OFF	ON	OFF	ON	OFF	ON	15	0 mm	ON	ON	0	OFF	OFF	OFF	OFF	OFF	OFF	ON	OFF	Closed	OFF	ON	OFF
					225	Unusual Activity Detected	Shut Down Affected Components	User Confirmation	What	Null	Null	How	Feedback-Adaptation	High	True	ON	15	Low	Null	True	08/05/2024 20:54:61	Closed	Open	ON	Occupied	Open	OFF	OFF	OFF	OFF	ON	ON	34	10 mm	ON	ON	0	OFF	OFF	OFF	ON	OFF	OFF	OFF	OFF	Closed	OFF	ON	ON
					226	Routine Maintenance Alert	Schedule Repair	Rain Detected = True	What	Null	Null	How	Feedback	Low	False	OFF	17	Medium	Null	Null	08/05/2024 20:54:62	Closed	Closed	ON	Empty	Open	ON	OFF	ON	ON	ON	ON	26	40 mm	OFF	ON	0	OFF	OFF	ON	OFF	OFF	ON	OFF	OFF	Closed	OFF	ON	OFF
					227	Unexpected Shutdown	Send Alert to Admin	Rain Detected = True	What	Null	Null	How	Feedback-Adaptation	Medium	False	ON	25	High	Null	Null	08/05/2024 20:54:63	Open	Open	OFF	Occupied	Closed	OFF	OFF	OFF	OFF	OFF	ON	27	49 mm	OFF	ON	0	OFF	OFF	OFF	OFF	OFF	ON	ON	OFF	Closed	OFF	OFF	OFF
					228	Unauthorized Access Detected	Schedule Repair	User Confirmation	What	Null	Null	How	Feedback-Adaptation	High	False	OFF	28	High	Null	False	08/05/2024 20:54:64	Open	Open	OFF	Occupied	Closed	OFF	ON	OFF	OFF	ON	ON	30	0 mm	ON	ON	0	OFF	OFF	OFF	OFF	OFF	ON	OFF	ON	Closed	ON	OFF	ON
[truncated: 25 more columns]
