# Supplementary material for: Automatic generation of explanations in autonomous systems: enhancing human interaction in smart home environments
Source: PeerJ Comput Sci. 2025 Aug 29;11:e3041. doi: 10.7717/peerj-cs.3041 (PMC12453768; doi:10.7717/peerj-cs.3041)
Supplement: Supplemental Information 3 — The code dictionary and the description of each spreadsheet of the “Dataset” and “Questionnaire answers & data analysis” workbooks. [file peerj-cs-11-3041-s003.xlsx]

## Sheet: Dictionary
	Code Dictionary: Questionnaire answers & data analysis
	Data Questionnaire	This spreadsheet shows the raw data after the application of the questionnaire used in the research.
	General Data	In this sheet we have made the first processing of the data sheet, “Data Questionnaire” where data such as number of participants, gender, age and technological experience are obtained.
	E01	This sheet is used to process the data on scenario 01. Only the frequency of responses is obtained according to the response scale.
	E02	This sheet is used to process the data on scenario 02. Only the frequency of responses is obtained according to the response scale.
	E03	This sheet is used to process the data on scenario 03. Only the frequency of responses is obtained according to the response scale.
	E04	This sheet is used to process the data on scenario 04. Only the frequency of responses is obtained according to the response scale.
	E05	This sheet is used to process the data on scenario 05. Only the frequency of responses is obtained according to the response scale.
	DF1	This sheet shows the frequency and percentage values after analyzing the results of scenario 01.
	DF2	This sheet shows the frequency and percentage values after analyzing the results of scenario 02.
	DF3	This sheet shows the frequency and percentage values after analyzing the results of scenario 03.
	DF4	This sheet shows the frequency and percentage values after analyzing the results of scenario 04.
	DF5	This sheet shows the frequency and percentage values after analyzing the results of scenario 05.
	Average	In this sheet we obtain the average (%) over the five scenarios analyzed. This allows us to know the performance of our proposal.
	Code Dictionary: Dataset
	Dataset	This sheet contains the generated data set. It represents different contexts based on the smart home services.
	Search-scenario	This sheet contains the data set of the “Dataset” sheet but incorporates a search option to obtain the data (LOG) of the desired row.
